# Supplementary material for: Global diversity of terrestrial Mirusviruses reveals host expansion to Archaea
Source: Research Square preprint supplement (doi:10.21203/rs.3.rs-8102722/v1), 2025-12-02
Supplement: Supplementary file 1 [file 8c421d79f2c0d789219c3d74.xlsx]

## Sheet: Content
Supplementary Tables 1-7
Supplementary Table 1	Structural Similarity of Mirusvirus Major Capsid Proteins (MCPs) to Reference MCPs
Supplementary Table 2	Summary of Mirusvirus Phylogenetic Lineages and Environmental Sources
Supplementary Table 3	Annotation and Functional Classification of Auxiliary Metabolic Genes (AMGs) in Mirusvirus Genomes
Supplementary Table 4	Summary of Annotated Circular and Linear Mirusvirus Genomes
Supplementary Table 5	Summary of Archaea Associated with Mirusviruses Identified via BLASTn Analysis
Supplementary Table 6	Summary of Mirusvirus-Derived Endogenous Viral Elements within Archaeal Genomes
Supplementary Table 7	Detailed Information on Sequencing Reads Used for the Identification of Mirusvirus Genomes

## Sheet: Suppl Table 1
ID	length(aa)	Ecosystems	E-value (hmmsearch)	Bitscore (hmmsearch)	TM value-mirus based	TM value-herpes&caudo based
Mirus_AL_1_16	210	Agricultural Land	5.9e-50	179.8	0.72625	0.34815
Mirus_AL_2_22	1308	Agricultural Land	1.5e-37	138.8	0.53046	0.31458
Mirus_AL_3_109	1362	Agricultural Land	9e-34	126.3	0.5195	0.44731
Mirus_AL_4_32	422	Agricultural Land	1.2e-33	125.9	0.56501	0.3366
Mirus_AS_1_8	1429	Artificial Surfaces	4.5e-85	295.8	0.56607	0.41
Mirus_AS_2_17	1287	Artificial Surfaces	8.8e-74	258.5	0.58731	0.43603
Mirus_AS_3_16	1481	Artificial Surfaces	1e-53	192.2	0.61928	0.3328
Mirus_EST_1_8	613	Estuary	1.8e-270	908.2	0.9604	0.37926
Mirus_EST_2_43	613	Estuary	1.8e-270	908.2	0.96011	0.37227
Mirus_EST_3_75	612	Estuary	5e-246	827.4	0.91869	0.53417
Mirus_EST_4_30	731	Estuary	6.9e-240	807.1	0.90354	0.3183
Mirus_EST_5_4	731	Estuary	2.1e-239	805.5	0.88439	0.34818
Mirus_EST_6_5	881	Estuary	3.8e-221	745.2	0.814	0.29945
Mirus_EST_7_42	696	Estuary	3e-203	686.1	0.82012	0.34592
Mirus_EST_8_1	666	Estuary	3.9e-174	589.9	0.64749	0.3266
Mirus_EST_9_64	572	Estuary	5.2e-118	404.6	0.77575	0.34833
Mirus_EST_10_47	403	Estuary	3.9e-101	348.9	0.77481	0.4494
Mirus_EST_11_45	403	Estuary	3.9e-101	348.9	0.76677	0.44788
Mirus_EST_12_1	251	Estuary	3.5e-90	312.7	0.75341	0.57957
Mirus_FOR_1_3	1423	Forest	2.1e-111	382.7	0.61509	0.386
Mirus_FOR_2_101	873	Forest	1.8e-93	323.5	0.80768	0.35453
Mirus_FOR_3_21	1281	Forest	9.3e-75	261.7	0.57075	0.32262
Mirus_FOR_4_43	966	Forest	1.7e-55	198.1	0.61211	0.31014
Mirus_GLA_1_10	734	Glacier	7.8e-42	153	0.63098	0.36883
Mirus_GLA_2_7	734	Glacier	7.8e-42	153	0.6508	0.35618
Mirus_GRA_1_61	1411	Grassland	4.2e-101	348.7	0.64333	0.31936
Mirus_GRO_1_6	571	Groundwater	3.5e-154	524	0.84147	0.5481
Mirus_GRO_2_4	931	Groundwater	1.3e-116	400	0.56507	0.37859
Mirus_GRO_3_51	1540	Groundwater	4.2e-114	391.7	0.59584	0.45405
Mirus_GRO_4_8	1599	Groundwater	7.1e-110	377.7	0.51032	0.40659
Mirus_GRO_5_10	1039	Groundwater	2.9e-109	375.7	0.59885	0.435
Mirus_GRO_6_5	1063	Groundwater	1.6e-105	363.3	0.59785	0.41358
Mirus_GRO_7_22	1063	Groundwater	1.6e-105	363.3	0.59559	0.41661
Mirus_GRO_8_33	1071	Groundwater	4.1e-105	362	0.58243	0.38779
Mirus_GRO_9_9	1053	Groundwater	1.3e-103	357	0.58628	0.36301
Mirus_GRO_10_4	994	Groundwater	7.8e-95	328	0.52591	0.3678
Mirus_GRO_11_46	1060	Groundwater	1.2e-87	304.3	0.6648	0.35798
Mirus_GRO_12_34	1344	Groundwater	4e-84	292.6	0.55883	0.37937
Mirus_GRO_13_9	1272	Groundwater	1.1e-83	291.2	0.53121	0.3402
Mirus_GRO_14_4	989	Groundwater	1.5e-82	287.5	0.63225	0.31899
Mirus_GRO_15_4	1458	Groundwater	3.4e-81	283	0.59699	0.40682
Mirus_GRO_16_96	1480	Groundwater	4.3e-80	279.3	0.56455	0.3646
Mirus_GRO_17_45	1123	Groundwater	1.4e-78	274.3	0.74849	0.33627
Mirus_GRO_18_3	1010	Groundwater	2.1e-78	273.7	0.54744	0.36425
Mirus_GRO_19_2	2164	Groundwater	3.4e-77	269.8	0.55833	0.41689
Mirus_GRO_20_111	2374	Groundwater	8.4e-64	225.5	0.39042	0.39126
Mirus_GRO_21_13	1109	Groundwater	2.9e-53	190.7	0.73444	0.22222
Mirus_GRO_22_9	708	Groundwater	2.3e-46	168	0.61235	0.30315
Mirus_GRO_23_43	782	Groundwater	4e-46	167.1	0.64404	0.31419
Mirus_GRO_25_8	655	Groundwater	1e-43	159.2	0.66259	0.31706
Mirus_GRO_26_1	525	Groundwater	2.9e-43	157.7	0.6846	0.49714
Mirus_GRO_27_12	362	Groundwater	8.3e-39	143	0.70101	0.32419
Mirus_GRO_28_1	737	Groundwater	4.5e-36	133.9	0.61175	0.35254
Mirus_GRO_29_15	665	Groundwater	4.3e-34	127.4	0.23935	0.1804
Mirus_GRO_30_81	630	Groundwater	4.1e-32	120.9	0.77565	0.31626
Mirus_GRO_31_20	1363	Groundwater	7.8e-27	103.4	0.57344	0.44891
Mirus_GRO_32_28	721	Groundwater	2e-26	102.1	0.18732	0.12058
Mirus_WET_1_17	1010	Wetland	3e-127	435.1	0.59633	0.38457
Mirus_WET_2_12	1420	Wetland	2.8e-110	379	0.5758	0.42322
Mirus_WET_3_8	1312	Wetland	8.5e-110	377.4	0.69353	0.41703
Mirus_WET_4_19	1155	Wetland	7.2e-60	212.5	0.54341	0.41484
Mirus_WET_5_28	1155	Wetland	7.2e-60	212.5	0.58431	0.42807
Mirus_WET_6_7	1580	Wetland	3e-52	187.4	0.51991	0.44322
Mirus_WET_7_169	857	Wetland	8.6e-45	162.7	0.66883	0.43144
Mirus_WET_8_17	673	Wetland	3.1e-31	118	0.69809	0.29031
Mirus_AL_5_39	1499	Agricultural Land	4.4e-112	385	0.60006	0.42927

## Sheet: Suppl Table 2
Genomes	Clade	Type	Source
Mirusviricota_M05_0122_TARA_00003_3	M05	Reference	Surface sea
Mirusviricota_M05_0123_TARA_00016_5	M05	Reference	Surface sea
Mirusviricota_M03_0107_TARA_00004_8	M01&M03	Reference	Surface sea
Mirusviricota_M03_0106_TARA_00017_3	M01&M03	Reference	Surface sea
Mirusviricota_M03_0104_TARA_00027_24	M01&M03	Reference	Surface sea
Mirusviricota_M01_0026_TARA_00014_3	M01&M03	Reference	Surface sea
Mirusviricota_M03_0105_TARA_00021_6	M01&M03	Reference	Surface sea
Mirusviricota_M03_0099_TARA_00011_5	M01&M03	Reference	Surface sea
Mirusviricota_M03_0111_TARA_00017_3	M01&M03	Reference	Surface sea
Mirusviricota_M03_0112_TARA_00003_12	M01&M03	Reference	Surface sea
Mirusviricota_M03_0108_TARA_00018_11	M01&M03	Reference	Surface sea
Mirusviricota_M02_0076_TARA_00008_37	M02	Reference	Surface sea
Mirusviricota_M02_0070_TARA_00003_16	M02	Reference	Surface sea
Mirusviricota_M02_0083_TARA_00003_53	M02	Reference	Surface sea
deepsea_biorixv2025_mirusvirus_MV4_69233355_11	M02	Reference	Deep sea
Mirusviricota_M02_0072_TARA_00014_1	M02	Reference	Surface sea
deepsea_biorixv2025_mirusvirus_MV3_5667935_28	M02	Reference	Deep sea
Mirusviricota_M02_0078_TARA_00002_13	M02	Reference	Surface sea
Mirusviricota_M02_0071_TARA_00004_12	M02	Reference	Surface sea
deepsea_biorixv2025_mirusvirus_MV2_14868042_1	M02	Reference	Deep sea
Mirusviricota_M02_0081_TARA_00060_1	M02	Reference	Surface sea
Mirusviricota_M02_0081_TARA_00041_1	M02	Reference	Surface sea
Mirusviricota_M02_0069_TARA_00015_2	M02	Reference	Surface sea
Mirusviricota_M02_0058_TARA_00004_26	M02	Reference	Surface sea
Mirusviricota_M02_0080_TARA_00068_8	M02	Reference	Surface sea
Mirusviricota_M02_0082_TARA_00036_3	M02	Reference	Surface sea
Mirusviricota_M02_0067_TARA_00026_2	M02	Reference	Surface sea
Mirusviricota_M02_0065_TARA_00037_4	M02	Reference	Surface sea
Mirusviricota_M02_0050_TARA_00002_20	M02	Reference	Surface sea
Mirus_EST_1_8	M02	This study	Estuary
Mirusviricota_M02_0055_TARA_00027_1	M02	Reference	Surface sea
Mirusviricota_M02_0056_TARA_00001_18	M02	Reference	Surface sea
Mirusviricota_M02_0089_TARA_00004_4	M02	Reference	Surface sea
Mirusviricota_M02_0088_TARA_00035_14	M02	Reference	Surface sea
Mirusviricota_M02_0060_TARA_00024_7	M02	Reference	Surface sea
Mirusviricota_M02_0053_TARA_00047_3	M02	Reference	Surface sea
Mirusviricota_M02_0064_TARA_00003_2	M02	Reference	Surface sea
Mirusviricota_M02_0062_TARA_00022_4	M02	Reference	Surface sea
Mirusviricota_M02_0054_TARA_00002_32	M02	Reference	Surface sea
Mirusviricota_M02_0059_TARA_00011_11	M02	Reference	Surface sea
Mirusviricota_M02_0068_TARA_00009_5	M02	Reference	Surface sea
Mirusviricota_M02_0059_TARA_00027_9	M02	Reference	Surface sea
Mirusviricota_M02_0057_TARA_00002_4	M02	Reference	Surface sea
Mirusviricota_M02_0087_TARA_00035_5	M02	Reference	Surface sea
Mirusviricota_M02_0086_TARA_00026_8	M02	Reference	Surface sea
Mirusviricota_M07_0127_TARA_00002_65	M06&M07	Reference	Surface sea
Mirusviricota_M07_0126_TARA_00001_7	M06&M07	Reference	Surface sea
Mirus_EST_7_42	M06&M07	This study	Estuary
Mirusviricota_M06_0124_TARA_00003_14	M06&M07	Reference	Surface sea
Mirusviricota_M06_0125_TARA_00002_4	M06&M07	Reference	Surface sea
Mirusviricota_M06_0124_TARA_00003_15	M06&M07	Reference	Surface sea
Mirusviricota_M01_0038_TARA_00007_8	M01&M04	Reference	Surface sea
Mirusviricota_M01_0033_TARA_00006_15	M01&M04	Reference	Surface sea
Mirusviricota_M01_0017_TARA_00006_4	M01&M04	Reference	Surface sea
Mirusviricota_M01_0028_TARA_00005_7	M01&M04	Reference	Surface sea
Mirusviricota_M01_0026_TARA_00018_5	M01&M04	Reference	Surface sea
Mirusviricota_M01_0018_TARA_00008_1	M01&M04	Reference	Surface sea
Mirusviricota_M01_0001_TARA_00039_6	M01&M04	Reference	Surface sea
Mirusviricota_M01_0025_TARA_00014_36	M01&M04	Reference	Surface sea
Mirusviricota_M01_0022_TARA_00005_26	M01&M04	Reference	Surface sea
Mirusviricota_M01_0030_TARA_00002_21	M01&M04	Reference	Surface sea
Mirusviricota_M01_0002_TARA_00002_5	M01&M04	Reference	Surface sea
Mirus_EST_12_1	M01&M04	This study	Estuary
Mirus_EST_3_75	M01&M04	This study	Estuary
Mirusviricota_M04_0119_TARA_00009_14	M01&M04	Reference	Surface sea
Mirusviricota_M01_0042_TARA_00005_21	M01&M04	Reference	Surface sea
Mirusviricota_M01_0008_TARA_00011_10	M01&M04	Reference	Surface sea
Mirusviricota_M01_0007_TARA_00003_3	M01&M04	Reference	Surface sea
Mirusviricota_M01_0006_TARA_00008_4	M01&M04	Reference	Surface sea
Mirusviricota_M01_0005_TARA_00009_16	M01&M04	Reference	Surface sea
Mirusviricota_M01_0003_TARA_00015_22	M01&M04	Reference	Surface sea
Mirusviricota_M01_0024_TARA_00002_1	M01&M04	Reference	Surface sea
Mirusviricota_M01_0010_TARA_00011_7	M01&M04	Reference	Surface sea
Mirusviricota_M01_0010_TARA_00014_5	M01&M04	Reference	Surface sea
Mirus_EST_6_5	M01&M04	This study	Estuary
Mirus_EST_8_1	M01&M04	This study	Estuary
Mirusviricota_M01_0035_TARA_00005_13	M01&M04	Reference	Surface sea
Mirusviricota_M01_0036_TARA_00002_5	M01&M04	Reference	Surface sea
Mirusviricota_M01_0014_TARA_00001_61	M01&M04	Reference	Surface sea
Mirusviricota_M01_0031_TARA_00002_23	M01&M04	Reference	Surface sea
Mirusviricota_M01_0031_TARA_00009_6	M01&M04	Reference	Surface sea
Mirusviricota_M01_0029_TARA_00004_40	M01&M04	Reference	Surface sea
Mirusviricota_M01_0009_TARA_00001_15	M01&M04	Reference	Surface sea
Mirusviricota_M01_0015_TARA_00001_70	M01&M04	Reference	Surface sea
Mirusviricota_M01_0023_TARA_00006_1	M01&M04	Reference	Surface sea
Mirusviricota_M01_0012_TARA_00002_81	M01&M04	Reference	Surface sea
Mirusviricota_M01_0016_TARA_00025_6	M01&M04	Reference	Surface sea
Mirus_EST_4_30	M01&M04	This study	Estuary
Mirus_EST_5_4	M01&M04	This study	Estuary
current_biology_LGRX01003006.1_6	E01	Reference	Eukaryotic assemblies
current_biology_LGRX01037181.1_1	E01	Reference	Eukaryotic assemblies
current_biology_LGRX01034885.1_2	E01	Reference	Eukaryotic assemblies
current_biology_LGRX01000007.1_26	E01	Reference	Eukaryotic assemblies
24_AprH_contigs_gt2500_contig_19438_segment0_pilon_4	E01	Reference	Freshwater
current_biology_LGRX01030410.1_1	E01	Reference	Eukaryotic assemblies
current_biology_LGRX01004602.1_6	E01	Reference	Eukaryotic assemblies
current_biology_LGRX01000309.1_17	E01	Reference	Eukaryotic assemblies
current_biology_LGRX01004666.1_1	E01	Reference	Eukaryotic assemblies
current_biology_LGRX01000001.1_113	E01	Reference	Eukaryotic assemblies
Mirus_GRO_1_6	A01	This study	Groundwater
Mirus_AL_1_16	A01	This study	Agricultural Land
Mirus_EST_9_64	A01	This study	Estuary
Mirus_EST_10_47	A01	This study	Estuary
current_biology_BLSF01000061.1_107	E02	Reference	Eukaryotic assemblies
current_biology_JAGYYQ010000054.1_4	E02	Reference	Eukaryotic assemblies
current_biology_CM015707.1_158	E02	Reference	Eukaryotic assemblies
current_biology_KQ758882.1_94	E02	Reference	Eukaryotic assemblies
current_biology_CAJHUC010000281.1_273	E02	Reference	Eukaryotic assemblies
current_biology_LNGJ01000552.1_6	E02	Reference	Eukaryotic assemblies
current_biology_CM015708.1_56	E02	Reference	Eukaryotic assemblies
current_biology_NPFB01000045.1_49	E02	Reference	Eukaryotic assemblies
current_biology_KQ758850.1_5936	E02	Reference	Eukaryotic assemblies
current_biology_LNGJ01004689.1_27	E02	Reference	Eukaryotic assemblies
current_biology_BGKB01000168.1_100	E02	Reference	Eukaryotic assemblies
current_biology_SMSO01000032.1_3367	E02	Reference	Eukaryotic assemblies
current_biology_QDJC01003023.1_5	E02	Reference	Eukaryotic assemblies
current_biology_MU652259.1_1	E03	Reference	Eukaryotic assemblies
current_biology_MU647098.1_188	E03	Reference	Eukaryotic assemblies
current_biology_MU647192.1_118	E03	Reference	Eukaryotic assemblies
current_biology_MU647343.1_92	E03	Reference	Eukaryotic assemblies
current_biology_MU648466.1_9	E03	Reference	Eukaryotic assemblies
current_biology_MU647948.1_21	E03	Reference	Eukaryotic assemblies
21_MarE_contigs_gt2500_contig_14089_segment0_pilon_21	A02	Reference	Freshwater
21_MarE_contigs_gt2500_contig_10398_segment0_pilon_4	A02	Reference	Freshwater
current_biology_MU651408.1_1	E04	Reference	Eukaryotic assemblies
current_biology_MU648878.1_3	E04	Reference	Eukaryotic assemblies
current_biology_MU647596.1_89	E04	Reference	Eukaryotic assemblies
current_biology_MU647545.1_19	E04	Reference	Eukaryotic assemblies
current_biology_MU648145.1_7	E04	Reference	Eukaryotic assemblies
current_biology_MU647862.1_12	E04	Reference	Eukaryotic assemblies
current_biology_MU646366.1_1151	E04	Reference	Eukaryotic assemblies
03_JunE_contigs_gt2500_contig_19780_segment0_pilon_16	A03	Reference	Freshwater
current_biology_CANNYO010001087.1_13	A03	Reference	Eukaryotic assemblies
23_AprE_contigs_gt2500_contig_18063_segment0_pilon_35	A03	Reference	Freshwater
01_MayE_contigs_gt2500_contig_6659_segment0_pilon_12	A03	Reference	Freshwater
current_biology_CANNYO010001533.1_2	A03	Reference	Eukaryotic assemblies
23_AprE_contigs_gt2500_contig_18063_segment0_pilon_36	A03	Reference	Freshwater
current_biology_CANNYO010001104.1_8	A03	Reference	Eukaryotic assemblies
current_biology_CANNYO010000276.1_4	A03	Reference	Eukaryotic assemblies
deepsea_biorixv2025_mirusvirus_MV5_3774862_16	A04	Reference	Deep sea
17_JanE_contigs_gt2500_contig_8242_segment0_pilon_82	A04	Reference	Freshwater
15_DecE_contigs_gt2500_contig_7449_segment0_pilon_144	A04	Reference	Freshwater
17_JanE_contigs_gt2500_contig_18971_segment0_pilon_79	A04	Reference	Freshwater
24_AprH_contigs_gt2500_contig_5508_segment0_pilon_27	A04	Reference	Freshwater
19_FebE_contigs_gt2500_contig_2624_segment0_pilon_72	A04	Reference	Freshwater
03_JunE_contigs_gt2500_contig_25527_segment0_pilon_22	A04	Reference	Freshwater
05_JulE_contigs_gt2500_contig_10097_segment0_pilon_103	A04	Reference	Freshwater
09_SepE_contigs_gt2500_contig_1040_segment0_pilon_42	A04	Reference	Freshwater
07_AugE_contigs_gt2500_contig_2822_segment0_pilon_107	A04	Reference	Freshwater
17_JanE_contigs_gt2500_contig_5800_segment0_pilon_68	A04	Reference	Freshwater
15_DecE_contigs_gt2500_contig_3680_segment2_pilon_87	A04	Reference	Freshwater
21_MarE_contigs_gt2500_contig_7547_segment0_pilon_4	A04	Reference	Freshwater
17_JanE_contigs_gt2500_contig_5800_segment0_pilon_67	A04	Reference	Freshwater
19_FebE_contigs_gt2500_contig_11700_segment0_pilon_164	A04	Reference	Freshwater
22_MarH_contigs_gt2500_contig_2034_segment0_pilon_86	A04	Reference	Freshwater
09_SepE_contigs_gt2500_contig_23345_segment0_pilon_23	A04	Reference	Freshwater
03_JunE_contigs_gt2500_contig_25527_segment0_pilon_23	A04	Reference	Freshwater
deepsea_biorixv2025_mirusvirus_MV1_8090676_4	A05	Reference	Freshwater
21_MarE_contigs_gt2500_contig_6815_segment0_pilon_14	A05	Reference	Freshwater
01_MayE_contigs_gt2500_contig_12881_segment0_pilon_1	A05	Reference	Freshwater
24_AprH_contigs_gt2500_contig_21911_segment0_pilon_65	A05	Reference	Freshwater
01_MayE_contigs_gt2500_contig_14090_segment0_pilon_21	A05	Reference	Freshwater
20_FebH_contigs_gt2500_contig_1418_segment0_pilon_113	A05	Reference	Freshwater
19_FebE_contigs_gt2500_contig_15718_segment0_pilon_6	A05	Reference	Freshwater
13_NovE_contigs_gt2500_contig_3336_segment0_pilon_39	A05	Reference	Freshwater
15_DecE_contigs_gt2500_contig_7351_segment0_pilon_27	A05	Reference	Freshwater
17_JanE_contigs_gt2500_contig_22705_segment0_pilon_72	A05	Reference	Freshwater
22_MarH_contigs_gt2500_contig_19585_segment0_pilon_85	A05	Reference	Freshwater
19_FebE_contigs_gt2500_contig_17675_segment0_pilon_79	A05	Reference	Freshwater
03_JunE_contigs_gt2500_contig_13205_segment0_pilon_109	A05	Reference	Freshwater
17_JanE_contigs_gt2500_contig_7370_segment0_pilon_163	A05	Reference	Freshwater
15_DecE_contigs_gt2500_contig_5685_segment0_pilon_84	A05	Reference	Freshwater
03_JunE_contigs_gt2500_contig_13205_segment0_pilon_108	A05	Reference	Freshwater
01_MayE_contigs_gt2500_contig_1159_segment0_pilon_41	A05	Reference	Freshwater
09_SepE_contigs_gt2500_contig_6941_segment0_pilon_6	A05	Reference	Freshwater
01_MayE_contigs_gt2500_contig_1159_segment0_pilon_40	A05	Reference	Freshwater
11_OctE_contigs_gt2500_contig_759_segment0_pilon_30	A05	Reference	Freshwater
01_MayE_contigs_gt2500_contig_3839_segment0_pilon_18	A05	Reference	Freshwater
22_MarH_contigs_gt2500_contig_3713_segment0_pilon_211	A05	Reference	Freshwater
17_JanE_contigs_gt2500_contig_9612_segment0_pilon_192	A05	Reference	Freshwater
24_AprH_contigs_gt2500_contig_21911_segment0_pilon_63	A05	Reference	Freshwater
23_AprE_contigs_gt2500_contig_10913_segment0_pilon_255	A05	Reference	Freshwater
23_AprE_contigs_gt2500_contig_112_segment0_pilon_368	A05	Reference	Freshwater
21_MarE_contigs_gt2500_contig_20743_segment0_pilon_5	A05	Reference	Freshwater
03_JunE_contigs_gt2500_contig_19621_segment0_pilon_48	A05	Reference	Freshwater
01_MayE_contigs_gt2500_contig_13198_segment0_pilon_42	A05	Reference	Freshwater
02_MayH_contigs_gt2500_contig_9512_segment0_pilon_12	A05	Reference	Freshwater
24_AprH_contigs_gt2500_contig_9892_segment0_pilon_23	A05	Reference	Freshwater
17_JanE_contigs_gt2500_contig_7838_segment0_pilon_56	A05	Reference	Freshwater
22_MarH_contigs_gt2500_contig_970_segment0_pilon_50	A05	Reference	Freshwater
19_FebE_contigs_gt2500_contig_3519_segment0_pilon_47	A05	Reference	Freshwater
Mirus_GRO_3_51	A06	This study	Groundwater
Mirus_GRO_2_4	A06	This study	Groundwater
Mirus_WET_1_17	A06	This study	Wetland
Mirus_GRO_18_3	A06	This study	Groundwater
Mirus_GRO_10_4	A06	This study	Groundwater
Mirus_GRO_8_33	A06	This study	Groundwater
Mirus_GRO_26_1	A06	This study	Groundwater
Mirus_GRO_27_12	A06	This study	Groundwater
Mirus_GRO_9_9	A06	This study	Groundwater
Mirus_GRO_5_10	A06	This study	Groundwater
Mirus_GRO_7_22	A06	This study	Groundwater
Mirus_AL_4_32	T01	This study	Agricultural Land
Mirus_WET_3_8	T01	This study	Wetland
Mirus_GRO_16_96	T01	This study	Groundwater
Mirus_GRO_12_34	T01	This study	Groundwater
Mirus_AS_1_8	T01	This study	Artificial Surfaces
current_biology_CDFJ01186769.1_15	T02	Reference	Eukaryotic assemblies
Mirus_AS_2_17	T02	This study	Artificial Surfaces
Mirus_FOR_1_3	T02	This study	Forest
Mirus_WET_2_12	T02	This study	Wetland
23_AprE_contigs_gt2500_contig_5556_segment0_pilon_371	T02	Reference	Freshwater
Mirus_AS_3_16	T03	This study	Artificial Surfaces
Mirus_WET_6_7	T03	This study	Wetland
Mirus_AL_3_109	T03	This study	Agricultural Land
Mirus_WET_8_17	T03	This study	Wetland
Mirus_WET_4_19	T03	This study	Wetland
Mirus_AL_2_22	A07	This study	Agricultural Land
Mirus_GRO_11_46	A07	This study	Groundwater
Mirus_GRO_24_9	A07	This study	Groundwater
10_SepH_contigs_gt2500_contig_4879_segment0_pilon_13	A07	Reference	Freshwater
08_AugH_contigs_gt2500_contig_1968_segment0_pilon_21	A07	Reference	Freshwater
Mirus_GRO_14_4	A07	This study	Groundwater
Mirus_FOR_3_21	A07	This study	Forest
Mirus_FOR_4_43	A07	This study	Forest
Mirus_GRO_21_13	A07	This study	Groundwater
Mirus_GRO_15_4	A07	This study	Groundwater
Mirus_GRO_13_9	A07	This study	Groundwater
Mirus_FOR_2_101	A07	This study	Forest
Mirus_GRO_28_1	A07	This study	Groundwater
Mirus_GRO_4_8	A07	This study	Groundwater
Mirus_GRA_1_61	A07	This study	Grassland
naturemicrobiology_3300013307.a	A07	This study	Forest
Mirus_GRO_25_8	A08	This study	Groundwater
Mirus_GRO_22_9	A08	This study	Groundwater
Mirus_GRO_31_20	A09	This study	Groundwater
Mirus_GRO_17_45	A09	This study	Groundwater
Mirus_GRO_30_81	A09	This study	Groundwater
glacier_k141_19135323_flag_1_multi_14.0000_len_13899_10	A09	This study	Glacier
Mirus_WET_7_169	E05	This study	Wetland
Mirus_GRO_23_43	E05	This study	Groundwater
deepsea_biorixv2025_mirusvirus_MV1_296681_7	E05	Reference	Deep sea
current_biology_BJOX01002217.1_42	E05	Reference	Eukaryotic assemblies
current_biology_BJOX01002059.1_73	E05	Reference	Eukaryotic assemblies
current_biology_BJOX01002551.1_32	E05	Reference	Eukaryotic assemblies
current_biology_WBZZ01006110.1_22	E05	Reference	Eukaryotic assemblies
current_biology_BJOX01002739.1_6	E05	Reference	Eukaryotic assemblies
current_biology_BJOX01001092.1_29	E05	Reference	Eukaryotic assemblies
current_biology_WBZZ01006285.1_230	E05	Reference	Eukaryotic assemblies
current_biology_BJOX01001934.1_21	E05	Reference	Eukaryotic assemblies
current_biology_WBZZ01000861.1_25	E05	Reference	Eukaryotic assemblies
current_biology_BJOX01000147.1_239	E05	Reference	Eukaryotic assemblies
current_biology_WBZZ01004032.1_87	E05	Reference	Eukaryotic assemblies
current_biology_BJOX01001484.1_103	E05	Reference	Eukaryotic assemblies
current_biology_WBZZ01002519.1_80	E05	Reference	Eukaryotic assemblies
current_biology_WBZZ01000347.1_20	E05	Reference	Eukaryotic assemblies
current_biology_BJOX01001073.1_99	E05	Reference	Eukaryotic assemblies
current_biology_WBZZ01000680.1_15	E05	Reference	Eukaryotic assemblies
current_biology_BJOX01000870.1_107	E05	Reference	Eukaryotic assemblies
current_biology_WBZZ01003201.1_95	E05	Reference	Eukaryotic assemblies
current_biology_WBZZ01002188.1_91	E05	Reference	Eukaryotic assemblies
current_biology_BJOX01001166.1_121	E05	Reference	Eukaryotic assemblies
current_biology_BJOX01001948.1_34	E05	Reference	Eukaryotic assemblies
current_biology_BJOX01000286.1_16	E05	Reference	Eukaryotic assemblies
current_biology_WBZZ01002895.1_135	E05	Reference	Eukaryotic assemblies
current_biology_WBZZ01002895.1_114	E05	Reference	Eukaryotic assemblies
current_biology_BJOX01006925.1_1	E05	Reference	Eukaryotic assemblies
current_biology_BJOX01000050.1_1193	E05	Reference	Eukaryotic assemblies
current_biology_BJOX01000050.1_1177	E05	Reference	Eukaryotic assemblies
current_biology_WBZZ01003591.1_53	E05	Reference	Eukaryotic assemblies
current_biology_WBZZ01002417.1_52	E05	Reference	Eukaryotic assemblies
current_biology_BJOX01000325.1_8	E05	Reference	Eukaryotic assemblies
current_biology_WBZZ01006838.1_38	E05	Reference	Eukaryotic assemblies
current_biology_BJOX01003091.1_17	E05	Reference	Eukaryotic assemblies
current_biology_BJOX01000179.1_323	E05	Reference	Eukaryotic assemblies
current_biology_WBZZ01006387.1_115	E05	Reference	Eukaryotic assemblies
current_biology_WBZZ01004542.1_78	E05	Reference	Eukaryotic assemblies
current_biology_WBZZ01005554.1_4	E05	Reference	Eukaryotic assemblies
current_biology_BJOX01001184.1_130	E05	Reference	Eukaryotic assemblies
current_biology_WBZZ01005929.1_23	E05	Reference	Eukaryotic assemblies
current_biology_WBZZ01002628.1_13	E05	Reference	Eukaryotic assemblies
current_biology_WBZZ01005322.1_80	E05	Reference	Eukaryotic assemblies
current_biology_BJOX01002796.1_41	E05	Reference	Eukaryotic assemblies
current_biology_WBZZ01003335.1_17	E05	Reference	Eukaryotic assemblies
current_biology_BJOX01002378.1_20	E05	Reference	Eukaryotic assemblies
Mirus_GRO_19_2	/	This study	Groundwater
current_biology_JH993101.1_6	/	Reference	Eukaryotic assemblies

## Sheet: Suppl Table 3
gene	gene_id	scaffold	auxiliary_score	amg_flags	gene_description	module	sheet	header	subheader	potential_amg	gene_id_origin	metabolism	reference	verified
TARA_AON_NCLDV_00005_000000000005__full-cat_2_66	K01520	TARA_AON_NCLDV_00005_000000000005__full-cat_2	3	M	dUTP pyrophosphatase [EC:3.6.1.23] [RN:R02100]	Pyrimidine deoxyribonuleotide biosynthesis, CDP/CTP => dCDP/dCTP,dTDP/dTTP	MISC	Information systems	Nucleotide	TRUE	genome_summary_form
TARA_AON_NCLDV_00005_000000000008__full-cat_2_6	K01626	TARA_AON_NCLDV_00005_000000000008__full-cat_2	3	MF	3-deoxy-7-phosphoheptulonate synthase [EC:2.5.1.54] [RN:R01826]	Shikimate pathway, phosphoenolpyruvate + erythrose-4P => chorismate	Organic Nitrogen	Amino Acid		TRUE	genome_summary_form
TARA_AON_NCLDV_00022_000000000021__full-cat_2_5	K01520	TARA_AON_NCLDV_00022_000000000021__full-cat_2	3	MF	dUTP pyrophosphatase [EC:3.6.1.23] [RN:R02100]	Pyrimidine deoxyribonuleotide biosynthesis, CDP/CTP => dCDP/dCTP,dTDP/dTTP	MISC	Information systems	Nucleotide	TRUE	genome_summary_form
TARA_AON_NCLDV_00036_000000000001__full-cat_2_23	K01520	TARA_AON_NCLDV_00036_000000000001__full-cat_2	3	M	dUTP pyrophosphatase [EC:3.6.1.23] [RN:R02100]	Pyrimidine deoxyribonuleotide biosynthesis, CDP/CTP => dCDP/dCTP,dTDP/dTTP	MISC	Information systems	Nucleotide	TRUE	genome_summary_form
TARA_AON_NCLDV_00036_000000000007__full-cat_1_10	K00525	TARA_AON_NCLDV_00036_000000000007__full-cat_1	2	MKE	ribonucleoside-diphosphate reductase [EC:1.17.4.1] [RN:R02024]	Pyrimidine deoxyribonuleotide biosynthesis, CDP/CTP => dCDP/dCTP,dTDP/dTTP	MISC	Information systems	Nucleotide	TRUE	genome_summary_form
TARA_AON_NCLDV_00050_000000000004__full-cat_2_21	K00526	TARA_AON_NCLDV_00050_000000000004__full-cat_2	2	MKE	ribonucleoside-diphosphate reductase [EC:1.17.4.1] [RN:R02024]	Pyrimidine deoxyribonuleotide biosynthesis, CDP/CTP => dCDP/dCTP,dTDP/dTTP	MISC	Information systems	Nucleotide	TRUE	genome_summary_form
TARA_AON_NCLDV_00056_000000000004__full-cat_1_15	K00525	TARA_AON_NCLDV_00056_000000000004__full-cat_1	2	MKE	ribonucleoside-diphosphate reductase [EC:1.17.4.1] [RN:R02024]	Pyrimidine deoxyribonuleotide biosynthesis, CDP/CTP => dCDP/dCTP,dTDP/dTTP	MISC	Information systems	Nucleotide	TRUE	genome_summary_form
TARA_ARC_NCLDV_00035_000000000019__full-cat_2_15	K01520	TARA_ARC_NCLDV_00035_000000000019__full-cat_2	3	MF	dUTP pyrophosphatase [EC:3.6.1.23] [RN:R02100]	Pyrimidine deoxyribonuleotide biosynthesis, CDP/CTP => dCDP/dCTP,dTDP/dTTP	MISC	Information systems	Nucleotide	TRUE	genome_summary_form
TARA_ARC_NCLDV_00078_000000000001__full-cat_2_7	K00525	TARA_ARC_NCLDV_00078_000000000001__full-cat_2	3	MKE	ribonucleoside-diphosphate reductase [EC:1.17.4.1] [RN:R02024]	Pyrimidine deoxyribonuleotide biosynthesis, CDP/CTP => dCDP/dCTP,dTDP/dTTP	MISC	Information systems	Nucleotide	TRUE	genome_summary_form
TARA_ARC_NCLDV_00078_000000000001__full-cat_2_11	K00526	TARA_ARC_NCLDV_00078_000000000001__full-cat_2	3	MKEF	ribonucleoside-diphosphate reductase [EC:1.17.4.1] [RN:R02024]	Pyrimidine deoxyribonuleotide biosynthesis, CDP/CTP => dCDP/dCTP,dTDP/dTTP	MISC	Information systems	Nucleotide	TRUE	genome_summary_form
TARA_ARC_NCLDV_00106_000000000022__full-cat_2_8	K01520	TARA_ARC_NCLDV_00106_000000000022__full-cat_2	3	M	dUTP pyrophosphatase [EC:3.6.1.23] [RN:R02100]	Pyrimidine deoxyribonuleotide biosynthesis, CDP/CTP => dCDP/dCTP,dTDP/dTTP	MISC	Information systems	Nucleotide	TRUE	genome_summary_form
TARA_ARC_NCLDV_00142_000000000008__full-cat_2_6	K00526	TARA_ARC_NCLDV_00142_000000000008__full-cat_2	3	MKEF	ribonucleoside-diphosphate reductase [EC:1.17.4.1] [RN:R02024]	Pyrimidine deoxyribonuleotide biosynthesis, CDP/CTP => dCDP/dCTP,dTDP/dTTP	MISC	Information systems	Nucleotide	TRUE	genome_summary_form
TARA_MED_NCLDV_00048_000000000009__full-cat_2_36	K00526	TARA_MED_NCLDV_00048_000000000009__full-cat_2	3	MKEF	ribonucleoside-diphosphate reductase [EC:1.17.4.1] [RN:R02024]	Pyrimidine deoxyribonuleotide biosynthesis, CDP/CTP => dCDP/dCTP,dTDP/dTTP	MISC	Information systems	Nucleotide	TRUE	genome_summary_form
TARA_MED_NCLDV_00067_000000000002__full-cat_2_30	K00525	TARA_MED_NCLDV_00067_000000000002__full-cat_2	3	MKE	ribonucleoside-diphosphate reductase [EC:1.17.4.1] [RN:R02024]	Pyrimidine deoxyribonuleotide biosynthesis, CDP/CTP => dCDP/dCTP,dTDP/dTTP	MISC	Information systems	Nucleotide	TRUE	genome_summary_form
TARA_MED_NCLDV_00094_000000000002__full-cat_2_35	K00526	TARA_MED_NCLDV_00094_000000000002__full-cat_2	2	MKE	ribonucleoside-diphosphate reductase [EC:1.17.4.1] [RN:R02024]	Pyrimidine deoxyribonuleotide biosynthesis, CDP/CTP => dCDP/dCTP,dTDP/dTTP	MISC	Information systems	Nucleotide	TRUE	genome_summary_form
TARA_MED_NCLDV_00096_000000000001__full-cat_2_15	K00525	TARA_MED_NCLDV_00096_000000000001__full-cat_2	3	MKE	ribonucleoside-diphosphate reductase [EC:1.17.4.1] [RN:R02024]	Pyrimidine deoxyribonuleotide biosynthesis, CDP/CTP => dCDP/dCTP,dTDP/dTTP	MISC	Information systems	Nucleotide	TRUE	genome_summary_form
TARA_MED_NCLDV_00100_000000000013__full-cat_2_10	K00560	TARA_MED_NCLDV_00100_000000000013__full-cat_2	3	MF	thymidylate synthase [EC:2.1.1.45] [RN:R02101]	Pyrimidine deoxyribonuleotide biosynthesis, CDP/CTP => dCDP/dCTP,dTDP/dTTP	MISC	Information systems	Nucleotide	TRUE	genome_summary_form
TARA_MED_NCLDV_00112_000000000003__full-cat_2_12	K00526	TARA_MED_NCLDV_00112_000000000003__full-cat_2	3	MKE	ribonucleoside-diphosphate reductase [EC:1.17.4.1] [RN:R02024]	Pyrimidine deoxyribonuleotide biosynthesis, CDP/CTP => dCDP/dCTP,dTDP/dTTP	MISC	Information systems	Nucleotide	TRUE	genome_summary_form
TARA_MED_NCLDV_00114_000000000003__full-cat_2_3	K01520	TARA_MED_NCLDV_00114_000000000003__full-cat_2	3	MF	dUTP pyrophosphatase [EC:3.6.1.23] [RN:R02100]	Pyrimidine deoxyribonuleotide biosynthesis, CDP/CTP => dCDP/dCTP,dTDP/dTTP	MISC	Information systems	Nucleotide	TRUE	genome_summary_form
TARA_PON_NCLDV_00018_000000000004__full-cat_1_12	I31	TARA_PON_NCLDV_00018_000000000004__full-cat_1	2	M	Inhibitors primarily of the papain-like cysteine peptidases in family C1 known as the thyropins	Inhibitors primarily of the papain-like cysteine peptidases	Organic Nitrogen	Peptidase		TRUE	genome_summary_form
TARA_PON_NCLDV_00021_000000000017__full-cat_1_8	K01520	TARA_PON_NCLDV_00021_000000000017__full-cat_1	2	M	dUTP pyrophosphatase [EC:3.6.1.23] [RN:R02100]	Pyrimidine deoxyribonuleotide biosynthesis, CDP/CTP => dCDP/dCTP,dTDP/dTTP	MISC	Information systems	Nucleotide	TRUE	genome_summary_form
TARA_PON_NCLDV_00033_000000000005__full-cat_2_14	K01520	TARA_PON_NCLDV_00033_000000000005__full-cat_2	3	M	dUTP pyrophosphatase [EC:3.6.1.23] [RN:R02100]	Pyrimidine deoxyribonuleotide biosynthesis, CDP/CTP => dCDP/dCTP,dTDP/dTTP	MISC	Information systems	Nucleotide	TRUE	genome_summary_form
TARA_PON_NCLDV_00033_000000000005__full-cat_2_19	GT2	TARA_PON_NCLDV_00033_000000000005__full-cat_2	3	M	GT2 cellulose synthase (EC 2.4.1.12); chitin synthase (EC 2.4.1.16); dolichyl-phosphate beta-D-mannosyltransferase (EC 2.4.1.83); dolichyl-phosphate beta-glucosyltransferase (EC 2.4.1.117); N-acetylglucosaminyltransferase (EC 2.4.1.-); N-acetylgalactosaminyltransferase (EC 2.4.1.-); hyaluronan synthase (EC 2.4.1.212); chitin oligosaccharide synthase (EC 2.4.1.-); beta-1,3-glucan synthase (EC 2.4.…	GlycosylTransferases	carbon utilization	CAZY		TRUE	genome_summary_form
TARA_PON_NCLDV_00034_000000000002__full-cat_2_19	K00526	TARA_PON_NCLDV_00034_000000000002__full-cat_2	3	MKE	ribonucleoside-diphosphate reductase [EC:1.17.4.1] [RN:R02024]	Pyrimidine deoxyribonuleotide biosynthesis, CDP/CTP => dCDP/dCTP,dTDP/dTTP	MISC	Information systems	Nucleotide	TRUE	genome_summary_form
TARA_PON_NCLDV_00045_000000000004__full-cat_2_9	K01520	TARA_PON_NCLDV_00045_000000000004__full-cat_2	3	MF	dUTP pyrophosphatase [EC:3.6.1.23] [RN:R02100]	Pyrimidine deoxyribonuleotide biosynthesis, CDP/CTP => dCDP/dCTP,dTDP/dTTP	MISC	Information systems	Nucleotide	TRUE	genome_summary_form
TARA_PSE_NCLDV_00013_000000000002__full-cat_2_24	K09882	TARA_PSE_NCLDV_00013_000000000002__full-cat_2	3	MF	cobS; cobaltochelatase CobS [EC:6.6.1.2]	Cobalamin biosynthesis, precorrin2 => cobinamide	MISC	aerobic corrin ring synthesis		TRUE	genome_summary_form
TARA_PSE_NCLDV_00013_000000000040__full-cat_1_5	M17	TARA_PSE_NCLDV_00013_000000000040__full-cat_1	2	MF	Catlytic type: Metallo; any N-terminal amino acid can be released from dipeptides and polypeptides, although there is a preference for leucine; bonds with proline in P1 are not cleaved; maximally active between pH 9 and 9.5	Aminopeptidases	Organic Nitrogen	Peptidase		TRUE	genome_summary_form
TARA_PSW_NCLDV_00026_000000000003__full-cat_2_5	K00525	TARA_PSW_NCLDV_00026_000000000003__full-cat_2	3	MKEF	ribonucleoside-diphosphate reductase [EC:1.17.4.1] [RN:R02024]	Pyrimidine deoxyribonuleotide biosynthesis, CDP/CTP => dCDP/dCTP,dTDP/dTTP	MISC	Information systems	Nucleotide	TRUE	genome_summary_form
TARA_PSW_NCLDV_00026_000000000009__full-cat_1_36	K01626	TARA_PSW_NCLDV_00026_000000000009__full-cat_1	2	M	3-deoxy-7-phosphoheptulonate synthase [EC:2.5.1.54] [RN:R01826]	Shikimate pathway, phosphoenolpyruvate + erythrose-4P => chorismate	Organic Nitrogen	Amino Acid		TRUE	genome_summary_form
TARA_PSW_NCLDV_00040_000000000018__full-cat_2_21	K00525	TARA_PSW_NCLDV_00040_000000000018__full-cat_2	3	MKE	ribonucleoside-diphosphate reductase [EC:1.17.4.1] [RN:R02024]	Pyrimidine deoxyribonuleotide biosynthesis, CDP/CTP => dCDP/dCTP,dTDP/dTTP	MISC	Information systems	Nucleotide	TRUE	genome_summary_form
TARA_PSW_NCLDV_00043_000000000007__full-cat_2_11	I15	TARA_PSW_NCLDV_00043_000000000007__full-cat_2	3	M	Inhibitors of serine endopeptidases in family S1	Inhibitors of serine endopeptidases in family S1	Organic Nitrogen	Peptidase		TRUE	genome_summary_form
TARA_PSW_NCLDV_00043_000000000014__full-cat_2_5	K01520	TARA_PSW_NCLDV_00043_000000000014__full-cat_2	3	MF	dUTP pyrophosphatase [EC:3.6.1.23] [RN:R02100]	Pyrimidine deoxyribonuleotide biosynthesis, CDP/CTP => dCDP/dCTP,dTDP/dTTP	MISC	Information systems	Nucleotide	TRUE	genome_summary_form
TARA_PSW_NCLDV_00044_000000000006__full-cat_1_19	K00525	TARA_PSW_NCLDV_00044_000000000006__full-cat_1	2	MKE	ribonucleoside-diphosphate reductase [EC:1.17.4.1] [RN:R02024]	Pyrimidine deoxyribonuleotide biosynthesis, CDP/CTP => dCDP/dCTP,dTDP/dTTP	MISC	Information systems	Nucleotide	TRUE	genome_summary_form
TARA_PSW_NCLDV_00045_000000000005__full-cat_1_19	K00525	TARA_PSW_NCLDV_00045_000000000005__full-cat_1	2	MKE	ribonucleoside-diphosphate reductase [EC:1.17.4.1] [RN:R02024]	Pyrimidine deoxyribonuleotide biosynthesis, CDP/CTP => dCDP/dCTP,dTDP/dTTP	MISC	Information systems	Nucleotide	TRUE	genome_summary_form
TARA_PSW_NCLDV_00055_000000000001__full-cat_1_19	K00525	TARA_PSW_NCLDV_00055_000000000001__full-cat_1	2	MKE	ribonucleoside-diphosphate reductase [EC:1.17.4.1] [RN:R02024]	Pyrimidine deoxyribonuleotide biosynthesis, CDP/CTP => dCDP/dCTP,dTDP/dTTP	MISC	Information systems	Nucleotide	TRUE	genome_summary_form
TARA_PSW_NCLDV_00055_000000000004__full-cat_2_20	A31	TARA_PSW_NCLDV_00055_000000000004__full-cat_2	3	M	Catlytic type: Aspartate; HycI endopeptidase releases a 32-residue C-terminal peptide by cleavage of an -Arg-Met- bond;HybD cleaves following the equivalent -His-Met- bond in hydrogenase 2, removing 15 residues; HycI and HybD are in the processing of the precursors of bacterial hydrogenases to their active forms	Endopeptidases	Organic Nitrogen	Peptidase		TRUE	genome_summary_form
TARA_SOC_NCLDV_00004_000000000022__full-cat_1_6	K00525	TARA_SOC_NCLDV_00004_000000000022__full-cat_1	2	MKEF	ribonucleoside-diphosphate reductase [EC:1.17.4.1] [RN:R02024]	Pyrimidine deoxyribonuleotide biosynthesis, CDP/CTP => dCDP/dCTP,dTDP/dTTP	MISC	Information systems	Nucleotide	TRUE	genome_summary_form
TARA_SOC_NCLDV_00009_000000000005__full-cat_2_15	K00525	TARA_SOC_NCLDV_00009_000000000005__full-cat_2	3	MKE	ribonucleoside-diphosphate reductase [EC:1.17.4.1] [RN:R02024]	Pyrimidine deoxyribonuleotide biosynthesis, CDP/CTP => dCDP/dCTP,dTDP/dTTP	MISC	Information systems	Nucleotide	TRUE	genome_summary_form
TARA_SOC_NCLDV_00016_000000000002__full-cat_1_17	K00526	TARA_SOC_NCLDV_00016_000000000002__full-cat_1	2	MKE	ribonucleoside-diphosphate reductase [EC:1.17.4.1] [RN:R02024]	Pyrimidine deoxyribonuleotide biosynthesis, CDP/CTP => dCDP/dCTP,dTDP/dTTP	MISC	Information systems	Nucleotide	TRUE	genome_summary_form
TARA_SOC_NCLDV_00016_000000000003__full-cat_2_43	K00525	TARA_SOC_NCLDV_00016_000000000003__full-cat_2	3	MKEF	ribonucleoside-diphosphate reductase [EC:1.17.4.1] [RN:R02024]	Pyrimidine deoxyribonuleotide biosynthesis, CDP/CTP => dCDP/dCTP,dTDP/dTTP	MISC	Information systems	Nucleotide	TRUE	genome_summary_form
estuary_lwj.CRR363253.k141_1948929_length_113613_cov_13.2970__full-cat_2_89	K01520	estuary_lwj.CRR363253.k141_1948929_length_113613_cov_13.2970__full-cat_2	3	M	dUTP pyrophosphatase [EC:3.6.1.23] [RN:R02100]	Pyrimidine deoxyribonuleotide biosynthesis, CDP/CTP => dCDP/dCTP,dTDP/dTTP	MISC	Information systems	Nucleotide	TRUE	genome_summary_form
estuary_lwj.CRR363264.k141_872621_length_54956_cov_56.5222__full-cat_2_17	K00525	estuary_lwj.CRR363264.k141_872621_length_54956_cov_56.5222__full-cat_2	3	MKE	ribonucleoside-diphosphate reductase [EC:1.17.4.1] [RN:R02024]	Pyrimidine deoxyribonuleotide biosynthesis, CDP/CTP => dCDP/dCTP,dTDP/dTTP	MISC	Information systems	Nucleotide	TRUE	genome_summary_form
estuary_lwj.CRR363266.k141_2677322_length_49713_cov_23.5579__full-cat_2_43	K00560	estuary_lwj.CRR363266.k141_2677322_length_49713_cov_23.5579__full-cat_2	3	M	thymidylate synthase [EC:2.1.1.45] [RN:R02101]	Pyrimidine deoxyribonuleotide biosynthesis, CDP/CTP => dCDP/dCTP,dTDP/dTTP	MISC	Information systems	Nucleotide	TRUE	genome_summary_form
estuary_lwj.CRR363266.k141_2677322_length_49713_cov_23.5579__full-cat_2_50	K00525	estuary_lwj.CRR363266.k141_2677322_length_49713_cov_23.5579__full-cat_2	3	MKE	ribonucleoside-diphosphate reductase [EC:1.17.4.1] [RN:R02024]	Pyrimidine deoxyribonuleotide biosynthesis, CDP/CTP => dCDP/dCTP,dTDP/dTTP	MISC	Information systems	Nucleotide	TRUE	genome_summary_form
TARA_AON_NCLDV_00028_000000000023__full-cat_2_13	PF01734	TARA_AON_NCLDV_00028_000000000023__full-cat_2	3	MKF	Patatin-like phospholipase						amg_database		Roux et al. 2016	FALSE
TARA_AON_NCLDV_00036_000000000001__full-cat_2_14	PF01467	TARA_AON_NCLDV_00036_000000000001__full-cat_2	3	MK	Cytidylyltransferase						amg_database		Roux et al. 2016	FALSE
TARA_AON_NCLDV_00036_000000000007__full-cat_1_10	EC:1.17.4.1	TARA_AON_NCLDV_00036_000000000007__full-cat_1	2	MKE	nrdA/nrdB; ribonucleotide reductase (RNR)	M00053					amg_database		Thompson et al. 2011; Sullivan et al. 2005	TRUE
TARA_AON_NCLDV_00036_000000000007__full-cat_1_10	PF02867	TARA_AON_NCLDV_00036_000000000007__full-cat_1	2	MKE	nrdA/nrdB; ribonucleotide reductase (RNR)	M00053					amg_database		Thompson et al. 2011; Sullivan et al. 2005	TRUE
TARA_AON_NCLDV_00036_000000000007__full-cat_1_10	K00525	TARA_AON_NCLDV_00036_000000000007__full-cat_1	2	MKE	nrdA/nrdB; ribonucleotide reductase (RNR)	M00053					amg_database		Thompson et al. 2011; Sullivan et al. 2005	TRUE
TARA_AON_NCLDV_00036_000000000007__full-cat_1_10	PF00317	TARA_AON_NCLDV_00036_000000000007__full-cat_1	2	MKE	nrdA/nrdB; ribonucleotide reductase (RNR)	M00053					amg_database		Thompson et al. 2011; Sullivan et al. 2005	TRUE
TARA_AON_NCLDV_00036_000000000007__full-cat_1_24	PF01734	TARA_AON_NCLDV_00036_000000000007__full-cat_1	2	MKF	Patatin-like phospholipase						amg_database		Roux et al. 2016	FALSE
TARA_AON_NCLDV_00050_000000000004__full-cat_2_21	EC:1.17.4.1	TARA_AON_NCLDV_00050_000000000004__full-cat_2	2	MKE	nrdA/nrdB; ribonucleotide reductase (RNR)	M00053					amg_database		Thompson et al. 2011; Sullivan et al. 2005	TRUE
TARA_AON_NCLDV_00052_000000000002__full-cat_2_24	PF01734	TARA_AON_NCLDV_00052_000000000002__full-cat_2	3	MKF	Patatin-like phospholipase						amg_database		Roux et al. 2016	FALSE
TARA_AON_NCLDV_00056_000000000004__full-cat_1_15	EC:1.17.4.1	TARA_AON_NCLDV_00056_000000000004__full-cat_1	2	MKE	nrdA/nrdB; ribonucleotide reductase (RNR)	M00053					amg_database		Thompson et al. 2011; Sullivan et al. 2005	TRUE
TARA_AON_NCLDV_00056_000000000004__full-cat_1_15	PF02867	TARA_AON_NCLDV_00056_000000000004__full-cat_1	2	MKE	nrdA/nrdB; ribonucleotide reductase (RNR)	M00053					amg_database		Thompson et al. 2011; Sullivan et al. 2005	TRUE
TARA_AON_NCLDV_00056_000000000004__full-cat_1_15	K00525	TARA_AON_NCLDV_00056_000000000004__full-cat_1	2	MKE	nrdA/nrdB; ribonucleotide reductase (RNR)	M00053					amg_database		Thompson et al. 2011; Sullivan et al. 2005	TRUE
TARA_AON_NCLDV_00056_000000000004__full-cat_1_15	PF00317	TARA_AON_NCLDV_00056_000000000004__full-cat_1	2	MKE	nrdA/nrdB; ribonucleotide reductase (RNR)	M00053					amg_database		Thompson et al. 2011; Sullivan et al. 2005	TRUE
TARA_ARC_NCLDV_00023_000000000018__full-cat_2_6	PF00262	TARA_ARC_NCLDV_00023_000000000018__full-cat_2	3	MKF	Calreticulin family						amg_database		Roux et al. 2016	FALSE
TARA_ARC_NCLDV_00023_000000000046__full-cat_2_2	PF03721	TARA_ARC_NCLDV_00023_000000000046__full-cat_2	3	MKF	UDP-glucose/GDP-mannose dehydrogenase family, NAD binding domain						amg_database		Roux et al. 2016	FALSE
TARA_ARC_NCLDV_00031_000000000005__full-cat_1_30	PF00534	TARA_ARC_NCLDV_00031_000000000005__full-cat_1	2	MK	Glycosyl transferases group 1						amg_database		Roux et al. 2016	FALSE
TARA_ARC_NCLDV_00078_000000000001__full-cat_2_7	EC:1.17.4.1	TARA_ARC_NCLDV_00078_000000000001__full-cat_2	3	MKE	nrdA/nrdB; ribonucleotide reductase (RNR)	M00053					amg_database		Thompson et al. 2011; Sullivan et al. 2005	TRUE
TARA_ARC_NCLDV_00078_000000000001__full-cat_2_7	PF02867	TARA_ARC_NCLDV_00078_000000000001__full-cat_2	3	MKE	nrdA/nrdB; ribonucleotide reductase (RNR)	M00053					amg_database		Thompson et al. 2011; Sullivan et al. 2005	TRUE
TARA_ARC_NCLDV_00078_000000000001__full-cat_2_7	K00525	TARA_ARC_NCLDV_00078_000000000001__full-cat_2	3	MKE	nrdA/nrdB; ribonucleotide reductase (RNR)	M00053					amg_database		Thompson et al. 2011; Sullivan et al. 2005	TRUE
TARA_ARC_NCLDV_00078_000000000001__full-cat_2_7	PF00317	TARA_ARC_NCLDV_00078_000000000001__full-cat_2	3	MKE	nrdA/nrdB; ribonucleotide reductase (RNR)	M00053					amg_database		Thompson et al. 2011; Sullivan et al. 2005	TRUE
TARA_ARC_NCLDV_00078_000000000001__full-cat_2_11	EC:1.17.4.1	TARA_ARC_NCLDV_00078_000000000001__full-cat_2	3	MKEF	nrdA/nrdB; ribonucleotide reductase (RNR)	M00053					amg_database		Thompson et al. 2011; Sullivan et al. 2005	TRUE
TARA_ARC_NCLDV_00078_000000000016__full-cat_2_7	PF01066	TARA_ARC_NCLDV_00078_000000000016__full-cat_2	3	MK	CDP-alcohol phosphatidyltransferase						amg_database		Roux et al. 2016	FALSE
TARA_ARC_NCLDV_00115_000000000014__full-cat_2_9	PF01734	TARA_ARC_NCLDV_00115_000000000014__full-cat_2	3	MK	Patatin-like phospholipase						amg_database		Roux et al. 2016	FALSE
TARA_ARC_NCLDV_00142_000000000008__full-cat_2_6	EC:1.17.4.1	TARA_ARC_NCLDV_00142_000000000008__full-cat_2	3	MKEF	nrdA/nrdB; ribonucleotide reductase (RNR)	M00053					amg_database		Thompson et al. 2011; Sullivan et al. 2005	TRUE
TARA_MED_NCLDV_00048_000000000009__full-cat_2_36	EC:1.17.4.1	TARA_MED_NCLDV_00048_000000000009__full-cat_2	3	MKEF	nrdA/nrdB; ribonucleotide reductase (RNR)	M00053					amg_database		Thompson et al. 2011; Sullivan et al. 2005	TRUE
TARA_MED_NCLDV_00067_000000000002__full-cat_2_28	PF01734	TARA_MED_NCLDV_00067_000000000002__full-cat_2	3	MK	Patatin-like phospholipase						amg_database		Roux et al. 2016	FALSE
TARA_MED_NCLDV_00067_000000000002__full-cat_2_30	EC:1.17.4.1	TARA_MED_NCLDV_00067_000000000002__full-cat_2	3	MKE	nrdA/nrdB; ribonucleotide reductase (RNR)	M00053					amg_database		Thompson et al. 2011; Sullivan et al. 2005	TRUE
TARA_MED_NCLDV_00067_000000000002__full-cat_2_30	PF02867	TARA_MED_NCLDV_00067_000000000002__full-cat_2	3	MKE	nrdA/nrdB; ribonucleotide reductase (RNR)	M00053					amg_database		Thompson et al. 2011; Sullivan et al. 2005	TRUE
TARA_MED_NCLDV_00067_000000000002__full-cat_2_30	K00525	TARA_MED_NCLDV_00067_000000000002__full-cat_2	3	MKE	nrdA/nrdB; ribonucleotide reductase (RNR)	M00053					amg_database		Thompson et al. 2011; Sullivan et al. 2005	TRUE
TARA_MED_NCLDV_00067_000000000002__full-cat_2_30	PF00317	TARA_MED_NCLDV_00067_000000000002__full-cat_2	3	MKE	nrdA/nrdB; ribonucleotide reductase (RNR)	M00053					amg_database		Thompson et al. 2011; Sullivan et al. 2005	TRUE
TARA_MED_NCLDV_00091_000000000001__full-cat_1_12	PF01734	TARA_MED_NCLDV_00091_000000000001__full-cat_1	2	MK	Patatin-like phospholipase						amg_database		Roux et al. 2016	FALSE
TARA_MED_NCLDV_00094_000000000002__full-cat_2_35	EC:1.17.4.1	TARA_MED_NCLDV_00094_000000000002__full-cat_2	2	MKE	nrdA/nrdB; ribonucleotide reductase (RNR)	M00053					amg_database		Thompson et al. 2011; Sullivan et al. 2005	TRUE
TARA_MED_NCLDV_00094_000000000003__full-cat_2_42	PF04488	TARA_MED_NCLDV_00094_000000000003__full-cat_2	3	MK	Glycosyltransferase sugar-binding region containing DXD motif						amg_database		Roux et al. 2016	FALSE
TARA_MED_NCLDV_00096_000000000001__full-cat_2_10	PF01734	TARA_MED_NCLDV_00096_000000000001__full-cat_2	3	MK	Patatin-like phospholipase						amg_database		Roux et al. 2016	FALSE
TARA_MED_NCLDV_00096_000000000001__full-cat_2_15	EC:1.17.4.1	TARA_MED_NCLDV_00096_000000000001__full-cat_2	3	MKE	nrdA/nrdB; ribonucleotide reductase (RNR)	M00053					amg_database		Thompson et al. 2011; Sullivan et al. 2005	TRUE
TARA_MED_NCLDV_00096_000000000001__full-cat_2_15	PF02867	TARA_MED_NCLDV_00096_000000000001__full-cat_2	3	MKE	nrdA/nrdB; ribonucleotide reductase (RNR)	M00053					amg_database		Thompson et al. 2011; Sullivan et al. 2005	TRUE
TARA_MED_NCLDV_00096_000000000001__full-cat_2_15	K00525	TARA_MED_NCLDV_00096_000000000001__full-cat_2	3	MKE	nrdA/nrdB; ribonucleotide reductase (RNR)	M00053					amg_database		Thompson et al. 2011; Sullivan et al. 2005	TRUE
TARA_MED_NCLDV_00096_000000000001__full-cat_2_15	PF00317	TARA_MED_NCLDV_00096_000000000001__full-cat_2	3	MKE	nrdA/nrdB; ribonucleotide reductase (RNR)	M00053					amg_database		Thompson et al. 2011; Sullivan et al. 2005	TRUE
TARA_MED_NCLDV_00100_000000000004__full-cat_2_4	PF01734	TARA_MED_NCLDV_00100_000000000004__full-cat_2	3	MKF	Patatin-like phospholipase						amg_database		Roux et al. 2016	FALSE
TARA_MED_NCLDV_00112_000000000003__full-cat_2_12	EC:1.17.4.1	TARA_MED_NCLDV_00112_000000000003__full-cat_2	3	MKE	nrdA/nrdB; ribonucleotide reductase (RNR)	M00053					amg_database		Thompson et al. 2011; Sullivan et al. 2005	TRUE
TARA_MED_NCLDV_00118_000000000012__full-cat_2_16	PF13532	TARA_MED_NCLDV_00118_000000000012__full-cat_2	3	MKF	2OG-Fe(II) oxygenase superfamily						amg_database	M	Roux et al. 2016	FALSE
TARA_PON_NCLDV_00021_000000000013__full-cat_2_9	PF01734	TARA_PON_NCLDV_00021_000000000013__full-cat_2	3	MKF	Patatin-like phospholipase						amg_database		Roux et al. 2016	FALSE
TARA_PON_NCLDV_00033_000000000005__full-cat_2_38	PF01073	TARA_PON_NCLDV_00033_000000000005__full-cat_2	3	MK	3-beta hydroxysteroid dehydrogenase/isomerase family						amg_database	M	Roux et al. 2016	FALSE
TARA_PON_NCLDV_00033_000000000005__full-cat_2_38	PF04321	TARA_PON_NCLDV_00033_000000000005__full-cat_2	3	MK	RmlD substrate binding domain						amg_database		Roux et al. 2016	FALSE
TARA_PON_NCLDV_00033_000000000005__full-cat_2_38	PF01370	TARA_PON_NCLDV_00033_000000000005__full-cat_2	3	MK	NAD dependent epimerase/dehydratase family						amg_database		Roux et al. 2016	FALSE
TARA_PON_NCLDV_00034_000000000001__full-cat_2_13	PF01734	TARA_PON_NCLDV_00034_000000000001__full-cat_2	3	MK	Patatin-like phospholipase						amg_database		Roux et al. 2016	FALSE
TARA_PON_NCLDV_00034_000000000002__full-cat_2_19	EC:1.17.4.1	TARA_PON_NCLDV_00034_000000000002__full-cat_2	3	MKE	nrdA/nrdB; ribonucleotide reductase (RNR)	M00053					amg_database		Thompson et al. 2011; Sullivan et al. 2005	TRUE
TARA_PON_NCLDV_00034_000000000003__full-cat_2_6	PF04321	TARA_PON_NCLDV_00034_000000000003__full-cat_2	3	MKF	RmlD substrate binding domain						amg_database		Roux et al. 2016	FALSE
TARA_PON_NCLDV_00034_000000000003__full-cat_2_6	PF01370	TARA_PON_NCLDV_00034_000000000003__full-cat_2	3	MKF	NAD dependent epimerase/dehydratase family						amg_database		Roux et al. 2016	FALSE
TARA_PON_NCLDV_00034_000000000003__full-cat_2_50	PF00487	TARA_PON_NCLDV_00034_000000000003__full-cat_2	3	MK	Fatty acid desaturase						amg_database	M	Roux et al. 2016	FALSE
TARA_PSE_NCLDV_00013_000000000002__full-cat_2_10	PF01503	TARA_PSE_NCLDV_00013_000000000002__full-cat_2	3	MKF	Phosphoribosyl-ATP pyrophosphohydrolase						amg_database	M	Roux et al. 2016	FALSE
TARA_PSE_NCLDV_00013_000000000004__full-cat_2_2	PF04321	TARA_PSE_NCLDV_00013_000000000004__full-cat_2	3	MKF	RmlD substrate binding domain						amg_database		Roux et al. 2016	FALSE
TARA_PSE_NCLDV_00013_000000000004__full-cat_2_2	PF01370	TARA_PSE_NCLDV_00013_000000000004__full-cat_2	3	MKF	NAD dependent epimerase/dehydratase family						amg_database		Roux et al. 2016	FALSE
TARA_PSE_NCLDV_00013_000000000004__full-cat_2_6	PF02543	TARA_PSE_NCLDV_00013_000000000004__full-cat_2	3	MKF	Carbamoyltransferase						amg_database		Roux et al. 2016	FALSE
TARA_PSE_NCLDV_00013_000000000004__full-cat_2_13	PF01073	TARA_PSE_NCLDV_00013_000000000004__full-cat_2	3	MKF	3-beta hydroxysteroid dehydrogenase/isomerase family						amg_database	M	Roux et al. 2016	FALSE
TARA_PSE_NCLDV_00013_000000000004__full-cat_2_13	PF04321	TARA_PSE_NCLDV_00013_000000000004__full-cat_2	3	MKF	RmlD substrate binding domain						amg_database		Roux et al. 2016	FALSE
TARA_PSE_NCLDV_00013_000000000004__full-cat_2_13	PF01370	TARA_PSE_NCLDV_00013_000000000004__full-cat_2	3	MKF	NAD dependent epimerase/dehydratase family						amg_database		Roux et al. 2016	FALSE
TARA_PSE_NCLDV_00013_000000000023__full-cat_1_13	PF01734	TARA_PSE_NCLDV_00013_000000000023__full-cat_1	2	MKF	Patatin-like phospholipase						amg_database		Roux et al. 2016	FALSE
TARA_PSE_NCLDV_00013_000000000024__full-cat_1_3	PF13640	TARA_PSE_NCLDV_00013_000000000024__full-cat_1	1	MKF	2OG-Fe(II) oxygenase superfamily						amg_database	M	Roux et al. 2016	FALSE
TARA_PSE_NCLDV_00013_000000000045__full-cat_1_3	PF13640	TARA_PSE_NCLDV_00013_000000000045__full-cat_1	1	MKF	2OG-Fe(II) oxygenase superfamily						amg_database	M	Roux et al. 2016	FALSE
TARA_PSE_NCLDV_00013_000000000045__full-cat_1_4	PF13759	TARA_PSE_NCLDV_00013_000000000045__full-cat_1	1	MKF	Putative 2OG-Fe(II) oxygenase						amg_database	M	Roux et al. 2016	FALSE
TARA_PSE_NCLDV_00013_000000000050__full-cat_1_8	PF02672	TARA_PSE_NCLDV_00013_000000000050__full-cat_1	1	MKE	cp12, calvin cycle protein inhibitor	M00006					amg_database		Thompson et al. 2011	TRUE
TARA_PSE_NCLDV_00050_000000000003__full-cat_1_11	PF13759	TARA_PSE_NCLDV_00050_000000000003__full-cat_1	2	MKF	Putative 2OG-Fe(II) oxygenase						amg_database	M	Roux et al. 2016	FALSE
TARA_PSW_NCLDV_00021_000000000061__full-cat_2_5	PF04321	TARA_PSW_NCLDV_00021_000000000061__full-cat_2	3	MKF	RmlD substrate binding domain						amg_database		Roux et al. 2016	FALSE
TARA_PSW_NCLDV_00021_000000000061__full-cat_2_5	PF01370	TARA_PSW_NCLDV_00021_000000000061__full-cat_2	3	MKF	NAD dependent epimerase/dehydratase family						amg_database		Roux et al. 2016	FALSE
TARA_PSW_NCLDV_00021_000000000061__full-cat_2_6	PF00984	TARA_PSW_NCLDV_00021_000000000061__full-cat_2	3	MKF	UDP-glucose/GDP-mannose dehydrogenase family, central domain						amg_database		Roux et al. 2016	FALSE
TARA_PSW_NCLDV_00021_000000000061__full-cat_2_6	PF03721	TARA_PSW_NCLDV_00021_000000000061__full-cat_2	3	MKF	UDP-glucose/GDP-mannose dehydrogenase family, NAD binding domain						amg_database		Roux et al. 2016	FALSE
TARA_PSW_NCLDV_00026_000000000003__full-cat_2_5	EC:1.17.4.1	TARA_PSW_NCLDV_00026_000000000003__full-cat_2	3	MKEF	nrdA/nrdB; ribonucleotide reductase (RNR)	M00053					amg_database		Thompson et al. 2011; Sullivan et al. 2005	TRUE
TARA_PSW_NCLDV_00026_000000000003__full-cat_2_5	PF02867	TARA_PSW_NCLDV_00026_000000000003__full-cat_2	3	MKEF	nrdA/nrdB; ribonucleotide reductase (RNR)	M00053					amg_database		Thompson et al. 2011; Sullivan et al. 2005	TRUE
TARA_PSW_NCLDV_00026_000000000003__full-cat_2_5	K00525	TARA_PSW_NCLDV_00026_000000000003__full-cat_2	3	MKEF	nrdA/nrdB; ribonucleotide reductase (RNR)	M00053					amg_database		Thompson et al. 2011; Sullivan et al. 2005	TRUE
TARA_PSW_NCLDV_00026_000000000003__full-cat_2_5	PF00317	TARA_PSW_NCLDV_00026_000000000003__full-cat_2	3	MKEF	nrdA/nrdB; ribonucleotide reductase (RNR)	M00053					amg_database		Thompson et al. 2011; Sullivan et al. 2005	TRUE
TARA_PSW_NCLDV_00026_000000000009__full-cat_1_20	PF01073	TARA_PSW_NCLDV_00026_000000000009__full-cat_1	2	MK	3-beta hydroxysteroid dehydrogenase/isomerase family						amg_database	M	Roux et al. 2016	FALSE
TARA_PSW_NCLDV_00026_000000000009__full-cat_1_20	PF04321	TARA_PSW_NCLDV_00026_000000000009__full-cat_1	2	MK	RmlD substrate binding domain						amg_database		Roux et al. 2016	FALSE
TARA_PSW_NCLDV_00026_000000000009__full-cat_1_20	PF01370	TARA_PSW_NCLDV_00026_000000000009__full-cat_1	2	MK	NAD dependent epimerase/dehydratase family						amg_database		Roux et al. 2016	FALSE
TARA_PSW_NCLDV_00026_000000000009__full-cat_1_21	PF01762	TARA_PSW_NCLDV_00026_000000000009__full-cat_1	2	MK	Galactosyltransferase						amg_database		Roux et al. 2016	FALSE
TARA_PSW_NCLDV_00040_000000000007__full-cat_2_6	PF13561	TARA_PSW_NCLDV_00040_000000000007__full-cat_2	3	MK	Enoyl-(Acyl carrier protein) reductase						amg_database	M	Roux et al. 2016	FALSE
TARA_PSW_NCLDV_00040_000000000007__full-cat_2_6	PF00106	TARA_PSW_NCLDV_00040_000000000007__full-cat_2	3	MK	short chain dehydrogenase						amg_database	M	Roux et al. 2016	FALSE
TARA_PSW_NCLDV_00040_000000000007__full-cat_2_6	PF01370	TARA_PSW_NCLDV_00040_000000000007__full-cat_2	3	MK	NAD dependent epimerase/dehydratase family						amg_database		Roux et al. 2016	FALSE
TARA_PSW_NCLDV_00040_000000000018__full-cat_2_21	EC:1.17.4.1	TARA_PSW_NCLDV_00040_000000000018__full-cat_2	3	MKE	nrdA/nrdB; ribonucleotide reductase (RNR)	M00053					amg_database		Thompson et al. 2011; Sullivan et al. 2005	TRUE
TARA_PSW_NCLDV_00040_000000000018__full-cat_2_21	PF02867	TARA_PSW_NCLDV_00040_000000000018__full-cat_2	3	MKE	nrdA/nrdB; ribonucleotide reductase (RNR)	M00053					amg_database		Thompson et al. 2011; Sullivan et al. 2005	TRUE
TARA_PSW_NCLDV_00040_000000000018__full-cat_2_21	K00525	TARA_PSW_NCLDV_00040_000000000018__full-cat_2	3	MKE	nrdA/nrdB; ribonucleotide reductase (RNR)	M00053					amg_database		Thompson et al. 2011; Sullivan et al. 2005	TRUE
TARA_PSW_NCLDV_00040_000000000018__full-cat_2_21	PF00317	TARA_PSW_NCLDV_00040_000000000018__full-cat_2	3	MKE	nrdA/nrdB; ribonucleotide reductase (RNR)	M00053					amg_database		Thompson et al. 2011; Sullivan et al. 2005	TRUE
TARA_PSW_NCLDV_00044_000000000006__full-cat_1_3	PF01734	TARA_PSW_NCLDV_00044_000000000006__full-cat_1	2	MKF	Patatin-like phospholipase						amg_database		Roux et al. 2016	FALSE
TARA_PSW_NCLDV_00044_000000000006__full-cat_1_19	EC:1.17.4.1	TARA_PSW_NCLDV_00044_000000000006__full-cat_1	2	MKE	nrdA/nrdB; ribonucleotide reductase (RNR)	M00053					amg_database		Thompson et al. 2011; Sullivan et al. 2005	TRUE
TARA_PSW_NCLDV_00044_000000000006__full-cat_1_19	PF02867	TARA_PSW_NCLDV_00044_000000000006__full-cat_1	2	MKE	nrdA/nrdB; ribonucleotide reductase (RNR)	M00053					amg_database		Thompson et al. 2011; Sullivan et al. 2005	TRUE
TARA_PSW_NCLDV_00044_000000000006__full-cat_1_19	K00525	TARA_PSW_NCLDV_00044_000000000006__full-cat_1	2	MKE	nrdA/nrdB; ribonucleotide reductase (RNR)	M00053					amg_database		Thompson et al. 2011; Sullivan et al. 2005	TRUE
TARA_PSW_NCLDV_00044_000000000006__full-cat_1_19	PF00317	TARA_PSW_NCLDV_00044_000000000006__full-cat_1	2	MKE	nrdA/nrdB; ribonucleotide reductase (RNR)	M00053					amg_database		Thompson et al. 2011; Sullivan et al. 2005	TRUE
TARA_PSW_NCLDV_00045_000000000001__full-cat_2_39	PF01734	TARA_PSW_NCLDV_00045_000000000001__full-cat_2	3	MK	Patatin-like phospholipase						amg_database		Roux et al. 2016	FALSE
TARA_PSW_NCLDV_00045_000000000005__full-cat_1_19	EC:1.17.4.1	TARA_PSW_NCLDV_00045_000000000005__full-cat_1	2	MKE	nrdA/nrdB; ribonucleotide reductase (RNR)	M00053					amg_database		Thompson et al. 2011; Sullivan et al. 2005	TRUE
TARA_PSW_NCLDV_00045_000000000005__full-cat_1_19	PF02867	TARA_PSW_NCLDV_00045_000000000005__full-cat_1	2	MKE	nrdA/nrdB; ribonucleotide reductase (RNR)	M00053					amg_database		Thompson et al. 2011; Sullivan et al. 2005	TRUE
TARA_PSW_NCLDV_00045_000000000005__full-cat_1_19	K00525	TARA_PSW_NCLDV_00045_000000000005__full-cat_1	2	MKE	nrdA/nrdB; ribonucleotide reductase (RNR)	M00053					amg_database		Thompson et al. 2011; Sullivan et al. 2005	TRUE
TARA_PSW_NCLDV_00045_000000000005__full-cat_1_19	PF00317	TARA_PSW_NCLDV_00045_000000000005__full-cat_1	2	MKE	nrdA/nrdB; ribonucleotide reductase (RNR)	M00053					amg_database		Thompson et al. 2011; Sullivan et al. 2005	TRUE
TARA_PSW_NCLDV_00051_000000000010__full-cat_2_7	PF13532	TARA_PSW_NCLDV_00051_000000000010__full-cat_2	3	MK	2OG-Fe(II) oxygenase superfamily						amg_database	M	Roux et al. 2016	FALSE
TARA_PSW_NCLDV_00055_000000000001__full-cat_1_6	PF01734	TARA_PSW_NCLDV_00055_000000000001__full-cat_1	2	MK	Patatin-like phospholipase						amg_database		Roux et al. 2016	FALSE
TARA_PSW_NCLDV_00055_000000000001__full-cat_1_19	EC:1.17.4.1	TARA_PSW_NCLDV_00055_000000000001__full-cat_1	2	MKE	nrdA/nrdB; ribonucleotide reductase (RNR)	M00053					amg_database		Thompson et al. 2011; Sullivan et al. 2005	TRUE
TARA_PSW_NCLDV_00055_000000000001__full-cat_1_19	PF02867	TARA_PSW_NCLDV_00055_000000000001__full-cat_1	2	MKE	nrdA/nrdB; ribonucleotide reductase (RNR)	M00053					amg_database		Thompson et al. 2011; Sullivan et al. 2005	TRUE
TARA_PSW_NCLDV_00055_000000000001__full-cat_1_19	K00525	TARA_PSW_NCLDV_00055_000000000001__full-cat_1	2	MKE	nrdA/nrdB; ribonucleotide reductase (RNR)	M00053					amg_database		Thompson et al. 2011; Sullivan et al. 2005	TRUE
TARA_PSW_NCLDV_00055_000000000001__full-cat_1_19	PF00317	TARA_PSW_NCLDV_00055_000000000001__full-cat_1	2	MKE	nrdA/nrdB; ribonucleotide reductase (RNR)	M00053					amg_database		Thompson et al. 2011; Sullivan et al. 2005	TRUE
TARA_SOC_NCLDV_00002_000000000007__full-cat_2_6	PF13532	TARA_SOC_NCLDV_00002_000000000007__full-cat_2	3	MK	2OG-Fe(II) oxygenase superfamily						amg_database	M	Roux et al. 2016	FALSE
TARA_SOC_NCLDV_00004_000000000022__full-cat_1_6	EC:1.17.4.1	TARA_SOC_NCLDV_00004_000000000022__full-cat_1	2	MKEF	nrdA/nrdB; ribonucleotide reductase (RNR)	M00053					amg_database		Thompson et al. 2011; Sullivan et al. 2005	TRUE
TARA_SOC_NCLDV_00004_000000000022__full-cat_1_6	PF02867	TARA_SOC_NCLDV_00004_000000000022__full-cat_1	2	MKEF	nrdA/nrdB; ribonucleotide reductase (RNR)	M00053					amg_database		Thompson et al. 2011; Sullivan et al. 2005	TRUE
TARA_SOC_NCLDV_00004_000000000022__full-cat_1_6	K00525	TARA_SOC_NCLDV_00004_000000000022__full-cat_1	2	MKEF	nrdA/nrdB; ribonucleotide reductase (RNR)	M00053					amg_database		Thompson et al. 2011; Sullivan et al. 2005	TRUE
TARA_SOC_NCLDV_00004_000000000022__full-cat_1_6	PF00317	TARA_SOC_NCLDV_00004_000000000022__full-cat_1	2	MKEF	nrdA/nrdB; ribonucleotide reductase (RNR)	M00053					amg_database		Thompson et al. 2011; Sullivan et al. 2005	TRUE
TARA_SOC_NCLDV_00009_000000000005__full-cat_2_15	EC:1.17.4.1	TARA_SOC_NCLDV_00009_000000000005__full-cat_2	3	MKE	nrdA/nrdB; ribonucleotide reductase (RNR)	M00053					amg_database		Thompson et al. 2011; Sullivan et al. 2005	TRUE
TARA_SOC_NCLDV_00009_000000000005__full-cat_2_15	PF02867	TARA_SOC_NCLDV_00009_000000000005__full-cat_2	3	MKE	nrdA/nrdB; ribonucleotide reductase (RNR)	M00053					amg_database		Thompson et al. 2011; Sullivan et al. 2005	TRUE
TARA_SOC_NCLDV_00009_000000000005__full-cat_2_15	K00525	TARA_SOC_NCLDV_00009_000000000005__full-cat_2	3	MKE	nrdA/nrdB; ribonucleotide reductase (RNR)	M00053					amg_database		Thompson et al. 2011; Sullivan et al. 2005	TRUE
TARA_SOC_NCLDV_00009_000000000005__full-cat_2_15	PF00317	TARA_SOC_NCLDV_00009_000000000005__full-cat_2	3	MKE	nrdA/nrdB; ribonucleotide reductase (RNR)	M00053					amg_database		Thompson et al. 2011; Sullivan et al. 2005	TRUE
TARA_SOC_NCLDV_00016_000000000002__full-cat_1_17	EC:1.17.4.1	TARA_SOC_NCLDV_00016_000000000002__full-cat_1	2	MKE	nrdA/nrdB; ribonucleotide reductase (RNR)	M00053					amg_database		Thompson et al. 2011; Sullivan et al. 2005	TRUE
TARA_SOC_NCLDV_00016_000000000003__full-cat_2_43	EC:1.17.4.1	TARA_SOC_NCLDV_00016_000000000003__full-cat_2	3	MKEF	nrdA/nrdB; ribonucleotide reductase (RNR)	M00053					amg_database		Thompson et al. 2011; Sullivan et al. 2005	TRUE
TARA_SOC_NCLDV_00016_000000000003__full-cat_2_43	PF02867	TARA_SOC_NCLDV_00016_000000000003__full-cat_2	3	MKEF	nrdA/nrdB; ribonucleotide reductase (RNR)	M00053					amg_database		Thompson et al. 2011; Sullivan et al. 2005	TRUE
TARA_SOC_NCLDV_00016_000000000003__full-cat_2_43	K00525	TARA_SOC_NCLDV_00016_000000000003__full-cat_2	3	MKEF	nrdA/nrdB; ribonucleotide reductase (RNR)	M00053					amg_database		Thompson et al. 2011; Sullivan et al. 2005	TRUE
TARA_SOC_NCLDV_00016_000000000003__full-cat_2_43	PF00317	TARA_SOC_NCLDV_00016_000000000003__full-cat_2	3	MKEF	nrdA/nrdB; ribonucleotide reductase (RNR)	M00053					amg_database		Thompson et al. 2011; Sullivan et al. 2005	TRUE
TARA_SOC_NCLDV_00016_000000000006__full-cat_1_15	PF01734	TARA_SOC_NCLDV_00016_000000000006__full-cat_1	2	MK	Patatin-like phospholipase						amg_database		Roux et al. 2016	FALSE
estuary_lwj.CRR363253.k141_1948929_length_113613_cov_13.2970__full-cat_2_56	PF13661	estuary_lwj.CRR363253.k141_1948929_length_113613_cov_13.2970__full-cat_2	3	MK	2OG-Fe(II) oxygenase superfamily						amg_database	M	Roux et al. 2016	FALSE
estuary_lwj.CRR363253.k141_1948929_length_113613_cov_13.2970__full-cat_2_57	PF13661	estuary_lwj.CRR363253.k141_1948929_length_113613_cov_13.2970__full-cat_2	3	MK	2OG-Fe(II) oxygenase superfamily						amg_database	M	Roux et al. 2016	FALSE
estuary_lwj.CRR363253.k141_1948929_length_113613_cov_13.2970__full-cat_2_85	PF04488	estuary_lwj.CRR363253.k141_1948929_length_113613_cov_13.2970__full-cat_2	3	MK	Glycosyltransferase sugar-binding region containing DXD motif						amg_database		Roux et al. 2016	FALSE
estuary_lwj.CRR363253.k141_1948929_length_113613_cov_13.2970__full-cat_2_86	PF01467	estuary_lwj.CRR363253.k141_1948929_length_113613_cov_13.2970__full-cat_2	3	MK	Cytidylyltransferase						amg_database		Roux et al. 2016	FALSE
estuary_lwj.CRR363264.k141_872621_length_54956_cov_56.5222__full-cat_2_17	EC:1.17.4.1	estuary_lwj.CRR363264.k141_872621_length_54956_cov_56.5222__full-cat_2	3	MKE	nrdA/nrdB; ribonucleotide reductase (RNR)	M00053					amg_database		Thompson et al. 2011; Sullivan et al. 2005	TRUE
estuary_lwj.CRR363264.k141_872621_length_54956_cov_56.5222__full-cat_2_17	PF02867	estuary_lwj.CRR363264.k141_872621_length_54956_cov_56.5222__full-cat_2	3	MKE	nrdA/nrdB; ribonucleotide reductase (RNR)	M00053					amg_database		Thompson et al. 2011; Sullivan et al. 2005	TRUE
estuary_lwj.CRR363264.k141_872621_length_54956_cov_56.5222__full-cat_2_17	K00525	estuary_lwj.CRR363264.k141_872621_length_54956_cov_56.5222__full-cat_2	3	MKE	nrdA/nrdB; ribonucleotide reductase (RNR)	M00053					amg_database		Thompson et al. 2011; Sullivan et al. 2005	TRUE
estuary_lwj.CRR363264.k141_872621_length_54956_cov_56.5222__full-cat_2_17	PF00317	estuary_lwj.CRR363264.k141_872621_length_54956_cov_56.5222__full-cat_2	3	MKE	nrdA/nrdB; ribonucleotide reductase (RNR)	M00053					amg_database		Thompson et al. 2011; Sullivan et al. 2005	TRUE
estuary_lwj.CRR363266.k141_2677322_length_49713_cov_23.5579__full-cat_2_50	EC:1.17.4.1	estuary_lwj.CRR363266.k141_2677322_length_49713_cov_23.5579__full-cat_2	3	MKE	nrdA/nrdB; ribonucleotide reductase (RNR)	M00053					amg_database		Thompson et al. 2011; Sullivan et al. 2005	TRUE
estuary_lwj.CRR363266.k141_2677322_length_49713_cov_23.5579__full-cat_2_50	PF02867	estuary_lwj.CRR363266.k141_2677322_length_49713_cov_23.5579__full-cat_2	3	MKE	nrdA/nrdB; ribonucleotide reductase (RNR)	M00053					amg_database		Thompson et al. 2011; Sullivan et al. 2005	TRUE
estuary_lwj.CRR363266.k141_2677322_length_49713_cov_23.5579__full-cat_2_50	K00525	estuary_lwj.CRR363266.k141_2677322_length_49713_cov_23.5579__full-cat_2	3	MKE	nrdA/nrdB; ribonucleotide reductase (RNR)	M00053					amg_database		Thompson et al. 2011; Sullivan et al. 2005	TRUE
estuary_lwj.CRR363266.k141_2677322_length_49713_cov_23.5579__full-cat_2_50	PF00317	estuary_lwj.CRR363266.k141_2677322_length_49713_cov_23.5579__full-cat_2	3	MKE	nrdA/nrdB; ribonucleotide reductase (RNR)	M00053					amg_database		Thompson et al. 2011; Sullivan et al. 2005	TRUE
estuary_lwj.CRR363266.k141_2677322_length_49713_cov_23.5579__full-cat_2_52	PF01734	estuary_lwj.CRR363266.k141_2677322_length_49713_cov_23.5579__full-cat_2	3	MK	Patatin-like phospholipase						amg_database		Roux et al. 2016	FALSE
estuary_re_lwj.CRR363257.k141_1381036_length_113332_cov_15.5788__full-cat_2_38	PF01734	estuary_re_lwj.CRR363257.k141_1381036_length_113332_cov_15.5788__full-cat_2	2	MK	Patatin-like phospholipase						amg_database		Roux et al. 2016	FALSE
natureeebinma_GSV_42070__full-cat_1_52	PF04616	natureeebinma_42070__full-cat_1	1	MK	Glycosyl hydrolases family 43; beta-1,4-xylosidase						amg_database		Emerson et al. 2018	FALSE

## Sheet: Suppl Table 4
seq_name	length	topology	coordinates	n_genes	genetic_code	virus_score	fdr	n_hallmarks	marker_enrichment
naturemicrobiology_3300013307.a:Ga0157372_10000035	174335	DTR	NA	150	11	0.9648	NA	1	11.0989
groundwater_k141_1521678_length_187768_cov_23.3277	187768	DTR	NA	171	11	0.9646	NA	2	9.9183
TARA_MED_NCLDV_00096_000000000002	82193	ITR	NA	88	11	0.9177	NA	2	16.0862
natureeebinma_42070	108489	DTR	NA	64	11	0.9021	NA	1	10.0589
natureeebinma_66536	44307	ITR	NA	54	11	0.8872	NA	2	8.2905
natureeebinma_77362	131968	ITR	NA	107	11	0.8503	NA	1	3.5055
groundwater_k141_1592359_length_167851_cov_63.7987	167851	DTR	NA	115	11	0.8309	NA	1	6.4502
groundwater_k141_1162044_length_135593_cov_24.0002	135593	DTR	NA	146	11	0.8002	NA	1	7.9169

## Sheet: Suppl Table 5
id	archaeal genome taxonomy	mapped virus	virus lineage	MCP	Portal	Triplex1	Triplex2	DNApolB	RNApolA	TFIIS	Number of mirusvirus marker genes	identity	length	mismatch	gapopen	qstart	qend	sstart	send	evalue	bitscore
clean_rmdup_total_ncbi_gtdb_archaea_ref.part_002.fna::GCA_001714685.2_genomic_MDTP02000017.1Methanosarcinasp.Ant1MSANT_contig000017,wholegenomeshotgunsequence:CRT:468	Halobacteriota	Mirus_AS_1_8	T01	Yes							1	100	24	0	0	2	25	40794	40771	2.71e-06	48.1
clean_rmdup_total_ncbi_gtdb_archaea_ref.part_005.fna::GCA_002508425.1_genomic_DAKU01000018.1MAGTPA_asm:MethanosarcinaceaearchaeonUBA470UBA470_contig_32389,wholegenomeshotgunsequence:CRT:107	Halobacteriota	TARA_ION_NCLDV_00014_000000000006	M04								0	94.444	36	1	1	6	40	14643	14608	3.48e-06	48.1
clean_rmdup_total_ncbi_gtdb_archaea_ref.part_011.fna::GCA_003665935.1_genomic_QPLR01000099.1Halobellussp.Atlit-31RP_contig000100,wholegenomeshotgunsequence:CRT:45	Halobacteriota	TARA_MED_NCLDV_00076_000000000031	M04								0	97.297	37	1	0	24	60	2492	2528	2.97e-11	65.9
clean_rmdup_total_ncbi_gtdb_archaea_ref.part_011.fna::GCA_003665935.1_genomic_QPLR01000099.1Halobellussp.Atlit-31RP_contig000100,wholegenomeshotgunsequence:CRT:45	Halobacteriota	TARA_MED_NCLDV_00076_000000000017	M04								0	100	29	0	0	32	60	7264	7292	7.23e-09	58
clean_rmdup_total_ncbi_gtdb_archaea_ref.part_011.fna::GCA_003665935.1_genomic_QPLR01000099.1Halobellussp.Atlit-31RP_contig000100,wholegenomeshotgunsequence:CRT:46	Halobacteriota	TARA_MED_NCLDV_00076_000000000031	M04								0	96.667	30	1	0	1	30	2499	2528	2.07e-07	52
clean_rmdup_total_ncbi_gtdb_archaea_ref.part_011.fna::GCA_003665935.1_genomic_QPLR01000099.1Halobellussp.Atlit-31RP_contig000100,wholegenomeshotgunsequence:CRT:46	Halobacteriota	TARA_MED_NCLDV_00076_000000000017	M04								0	100	25	0	0	6	30	7268	7292	8.16e-07	50.1
clean_rmdup_total_ncbi_gtdb_archaea_ref.part_011.fna::GCA_003665935.1_genomic_QPLR01000099.1Halobellussp.Atlit-31RP_contig000100,wholegenomeshotgunsequence:CRT:48	Halobacteriota	TARA_MED_NCLDV_00076_000000000017	M04								0	96.552	29	1	0	12	40	7268	7296	1.57e-06	50.1
clean_rmdup_total_ncbi_gtdb_archaea_ref.part_011.fna::GCA_003665935.1_genomic_QPLR01000099.1Halobellussp.Atlit-31RP_contig000100,wholegenomeshotgunsequence:CRT:60	Halobacteriota	Mirus_GRO_24_9	A03	Yes							1	96.667	30	1	0	29	58	16846	16875	4.71e-07	52
clean_rmdup_total_ncbi_gtdb_archaea_ref.part_014.fna::GCA_007571135.1_genomic_RKRY01000164.1MAG:Nitrosopumilussp.isolatePNGco_C_binVS21scaffold_460,wholegenomeshotgunsequence:CRT:201	Thermoproteota	13_NovE_contigs_gt2500_contig_3336_segment0_pilon	A06	Yes							1	100	24	0	0	24	47	57574	57597	4.13e-06	48.1
clean_rmdup_total_ncbi_gtdb_archaea_ref.part_014.fna::GCA_007571135.1_genomic_RKRY01000164.1MAG:Nitrosopumilussp.isolatePNGco_C_binVS21scaffold_460,wholegenomeshotgunsequence:CRT:201	Thermoproteota	15_DecE_contigs_gt2500_contig_7351_segment0_pilon	A06	Yes							1	100	24	0	0	24	47	6472	6449	4.13e-06	48.1
clean_rmdup_total_ncbi_gtdb_archaea_ref.part_014.fna::GCA_007571135.1_genomic_RKRY01000164.1MAG:Nitrosopumilussp.isolatePNGco_C_binVS21scaffold_460,wholegenomeshotgunsequence:CRT:201	Thermoproteota	21_MarE_contigs_gt2500_contig_10398_segment0_pilon	A07	Yes							1	100	25	0	0	23	47	15797	15773	1.04e-06	50.1
clean_rmdup_total_ncbi_gtdb_archaea_ref.part_014.fna::GCA_007571135.1_genomic_RKRY01000164.1MAG:Nitrosopumilussp.isolatePNGco_C_binVS21scaffold_460,wholegenomeshotgunsequence:CRT:201	Thermoproteota	TARA_ARC_NCLDV_00123_000000000003	M07								0	100	24	0	0	24	47	2740	2717	4.13e-06	48.1
clean_rmdup_total_ncbi_gtdb_archaea_ref.part_014.fna::GCA_007571135.1_genomic_RKRY01000164.1MAG:Nitrosopumilussp.isolatePNGco_C_binVS21scaffold_460,wholegenomeshotgunsequence:CRT:201	Thermoproteota	TARA_ARC_NCLDV_00123_000000000002	M07								0	100	24	0	0	24	47	1280	1257	4.13e-06	48.1
clean_rmdup_total_ncbi_gtdb_archaea_ref.part_014.fna::GCA_007571135.1_genomic_RKRY01000164.1MAG:Nitrosopumilussp.isolatePNGco_C_binVS21scaffold_460,wholegenomeshotgunsequence:CRT:201	Thermoproteota	TARA_AON_NCLDV_00056_000000000002	M01						Yes		1	100	24	0	0	24	47	35	12	4.13e-06	48.1
clean_rmdup_total_ncbi_gtdb_archaea_ref.part_014.fna::GCA_007571135.1_genomic_RKRY01000164.1MAG:Nitrosopumilussp.isolatePNGco_C_binVS21scaffold_460,wholegenomeshotgunsequence:CRT:201	Thermoproteota	CM015708.1	E04	Yes	Yes		Yes	Yes	Yes		5	100	24	0	0	24	47	21836	21813	4.13e-06	48.1
clean_rmdup_total_ncbi_gtdb_archaea_ref.part_014.fna::GCA_007571135.1_genomic_RKRY01000164.1MAG:Nitrosopumilussp.isolatePNGco_C_binVS21scaffold_460,wholegenomeshotgunsequence:CRT:201	Thermoproteota	23_AprE_contigs_gt2500_contig_112_segment0_pilon	A06	Yes	Yes						2	100	24	0	0	24	47	147368	147345	4.13e-06	48.1
clean_rmdup_total_ncbi_gtdb_archaea_ref.part_014.fna::GCA_007571135.1_genomic_RKRY01000164.1MAG:Nitrosopumilussp.isolatePNGco_C_binVS21scaffold_460,wholegenomeshotgunsequence:CRT:201	Thermoproteota	21_MarE_contigs_gt2500_contig_3530_segment0_pilon	A06	Yes	Yes						2	100	24	0	0	24	47	41935	41912	4.13e-06	48.1
clean_rmdup_total_ncbi_gtdb_archaea_ref.part_014.fna::GCA_007571135.1_genomic_RKRY01000164.1MAG:Nitrosopumilussp.isolatePNGco_C_binVS21scaffold_460,wholegenomeshotgunsequence:CRT:201	Thermoproteota	09_SepE_contigs_gt2500_contig_6941_segment0_pilon	A06	Yes							1	100	24	0	0	24	47	85974	85951	4.13e-06	48.1
clean_rmdup_total_ncbi_gtdb_archaea_ref.part_014.fna::GCA_007571135.1_genomic_RKRY01000164.1MAG:Nitrosopumilussp.isolatePNGco_C_binVS21scaffold_460,wholegenomeshotgunsequence:CRT:201	Thermoproteota	01_MayE_contigs_gt2500_contig_13198_segment0_pilon	A06	Yes							1	100	24	0	0	24	47	15770	15747	4.13e-06	48.1
clean_rmdup_total_ncbi_gtdb_archaea_ref.part_014.fna::GCA_007571135.1_genomic_RKRY01000164.1MAG:Nitrosopumilussp.isolatePNGco_C_binVS21scaffold_460,wholegenomeshotgunsequence:CRT:201	Thermoproteota	TARA_ARC_NCLDV_00023_000000000007	M02			Yes	Yes				2	100	24	0	0	24	47	10150	10173	4.13e-06	48.1
clean_rmdup_total_ncbi_gtdb_archaea_ref.part_014.fna::GCA_007571135.1_genomic_RKRY01000164.1MAG:Nitrosopumilussp.isolatePNGco_C_binVS21scaffold_460,wholegenomeshotgunsequence:CRT:201	Thermoproteota	Mirus_GRO_21_13	A03	Yes							1	100	24	0	0	24	47	21487	21510	4.13e-06	48.1
clean_rmdup_total_ncbi_gtdb_archaea_ref.part_014.fna::GCA_007571135.1_genomic_RKRY01000164.1MAG:Nitrosopumilussp.isolatePNGco_C_binVS21scaffold_460,wholegenomeshotgunsequence:CRT:201	Thermoproteota	24_AprH_contigs_gt2500_contig_9892_segment0_pilon	A06	Yes	Yes						2	100	24	0	0	24	47	76536	76559	4.13e-06	48.1
clean_rmdup_total_ncbi_gtdb_archaea_ref.part_014.fna::GCA_007571135.1_genomic_RKRY01000164.1MAG:Nitrosopumilussp.isolatePNGco_C_binVS21scaffold_460,wholegenomeshotgunsequence:CRT:201	Thermoproteota	23_AprE_contigs_gt2500_contig_5556_segment0_pilon	T02	Yes	Yes		Yes	Yes			4	100	24	0	0	24	47	348766	348789	4.13e-06	48.1
clean_rmdup_total_ncbi_gtdb_archaea_ref.part_014.fna::GCA_007571135.1_genomic_RKRY01000164.1MAG:Nitrosopumilussp.isolatePNGco_C_binVS21scaffold_460,wholegenomeshotgunsequence:CRT:201	Thermoproteota	22_MarH_contigs_gt2500_contig_970_segment0_pilon	A06	Yes	Yes						2	100	24	0	0	24	47	107486	107509	4.13e-06	48.1
clean_rmdup_total_ncbi_gtdb_archaea_ref.part_014.fna::GCA_007571135.1_genomic_RKRY01000164.1MAG:Nitrosopumilussp.isolatePNGco_C_binVS21scaffold_460,wholegenomeshotgunsequence:CRT:201	Thermoproteota	20_FebH_contigs_gt2500_contig_8072_segment0_pilon	A06	Yes	Yes						2	100	24	0	0	24	47	46678	46701	4.13e-06	48.1
clean_rmdup_total_ncbi_gtdb_archaea_ref.part_014.fna::GCA_007571135.1_genomic_RKRY01000164.1MAG:Nitrosopumilussp.isolatePNGco_C_binVS21scaffold_460,wholegenomeshotgunsequence:CRT:201	Thermoproteota	19_FebE_contigs_gt2500_contig_3519_segment0_pilon	A06	Yes	Yes						2	100	24	0	0	24	47	105682	105705	4.13e-06	48.1
clean_rmdup_total_ncbi_gtdb_archaea_ref.part_014.fna::GCA_007571135.1_genomic_RKRY01000164.1MAG:Nitrosopumilussp.isolatePNGco_C_binVS21scaffold_460,wholegenomeshotgunsequence:CRT:201	Thermoproteota	17_JanE_contigs_gt2500_contig_7838_segment0_pilon	A06	Yes	Yes						2	100	24	0	0	24	47	111895	111918	4.13e-06	48.1
clean_rmdup_total_ncbi_gtdb_archaea_ref.part_014.fna::GCA_007571135.1_genomic_RKRY01000164.1MAG:Nitrosopumilussp.isolatePNGco_C_binVS21scaffold_460,wholegenomeshotgunsequence:CRT:247	Thermoproteota	Mirus_AS_1_8	T01	Yes							1	100	23	0	0	9	31	24426	24404	8.15e-06	46.1
clean_rmdup_total_ncbi_gtdb_archaea_ref.part_014.fna::GCA_007571135.1_genomic_RKRY01000164.1MAG:Nitrosopumilussp.isolatePNGco_C_binVS21scaffold_460,wholegenomeshotgunsequence:CRT:623	Thermoproteota	Mirus_GRO_16_96	T01	Yes				Yes			2	100	26	0	0	16	41	86482	86457	3.22e-07	52
clean_rmdup_total_ncbi_gtdb_archaea_ref.part_014.fna::GCA_007571135.1_genomic_RKRY01000164.1MAG:Nitrosopumilussp.isolatePNGco_C_binVS21scaffold_460,wholegenomeshotgunsequence:CRT:623	Thermoproteota	Mirus_AS_2_17	T02	Yes							1	100	25	0	0	17	41	30619	30595	1.27e-06	50.1
clean_rmdup_total_ncbi_gtdb_archaea_ref.part_019.fna::GCA_013331925.1_genomic_DUFJ01000047.1MAGTPA_asm:CandidatusDiapherotritesarchaeonisolateUBA10036contig_193727,wholegenomeshotgunsequence:CRT:138	Iainarchaeota	TARA_ARC_NCLDV_00106_000000000015	M02								0	100	24	0	0	6	29	1840	1863	2.71e-06	48.1
clean_rmdup_total_ncbi_gtdb_archaea_ref.part_020.fna::GCA_014361205.1_genomic_JACIVZ010000127.1MAG:Methanomethylovoranssp.isolateMAG-12Methanomethylovorans_C3_bin7_Scaffold_127,wholegenomeshotgunsequence:CRT:1320	Halobacteriota	09_SepE_contigs_gt2500_contig_6941_segment0_pilon	A06	Yes							1	100	25	0	0	17	41	86161	86137	1.14e-06	50.1
clean_rmdup_total_ncbi_gtdb_archaea_ref.part_020.fna::GCA_014361205.1_genomic_JACIVZ010000127.1MAG:Methanomethylovoranssp.isolateMAG-12Methanomethylovorans_C3_bin7_Scaffold_127,wholegenomeshotgunsequence:CRT:1320	Halobacteriota	15_DecE_contigs_gt2500_contig_7351_segment0_pilon	A06	Yes							1	96.429	28	1	0	14	41	9868	9841	4.51e-06	48.1
clean_rmdup_total_ncbi_gtdb_archaea_ref.part_020.fna::GCA_014361205.1_genomic_JACIVZ010000127.1MAG:Methanomethylovoranssp.isolateMAG-12Methanomethylovorans_C3_bin7_Scaffold_127,wholegenomeshotgunsequence:CRT:1320	Halobacteriota	13_NovE_contigs_gt2500_contig_3336_segment0_pilon	A06	Yes							1	96.429	28	1	0	14	41	57549	57576	4.51e-06	48.1
clean_rmdup_total_ncbi_gtdb_archaea_ref.part_023.fna::GCA_015523685.1_genomic_WAJW01000078.1MAG:ArchaeoglobaceaearchaeonisolateS009_4_esomk151_156720,wholegenomeshotgunsequence:CRT:100	Halobacteriota	TARA_PSW_NCLDV_00085_000000000016	M01								0	96.774	31	1	0	1	31	969	999	6.06e-08	54
clean_rmdup_total_ncbi_gtdb_archaea_ref.part_023.fna::GCA_015523685.1_genomic_WAJW01000078.1MAG:ArchaeoglobaceaearchaeonisolateS009_4_esomk151_156720,wholegenomeshotgunsequence:CRT:100	Halobacteriota	TARA_PSW_NCLDV_00085_000000000020	M01								0	96.552	29	1	0	1	29	2235	2263	9.47e-07	50.1
clean_rmdup_total_ncbi_gtdb_archaea_ref.part_023.fna::GCA_015523685.1_genomic_WAJW01000078.1MAG:ArchaeoglobaceaearchaeonisolateS009_4_esomk151_156720,wholegenomeshotgunsequence:CRT:101	Halobacteriota	TARA_PSW_NCLDV_00085_000000000016	M01								0	96.667	30	1	0	1	30	969	998	2.4e-07	52
clean_rmdup_total_ncbi_gtdb_archaea_ref.part_023.fna::GCA_015523685.1_genomic_WAJW01000078.1MAG:ArchaeoglobaceaearchaeonisolateS009_4_esomk151_156720,wholegenomeshotgunsequence:CRT:101	Halobacteriota	TARA_PSW_NCLDV_00085_000000000020	M01								0	96.552	29	1	0	1	29	2235	2263	9.47e-07	50.1
clean_rmdup_total_ncbi_gtdb_archaea_ref.part_025.fna::GCA_016212395.1_genomic_JACRGF010000004.1MAG:CandidatusMicrarchaeotaarchaeonisolateNC_groundwater_1744_Pr3_B-0.1um_47_56SR-2_scaffold_141_54990,wholegenomeshotgunsequence:CRT:99	Micrarchaeota	Mirus_GRO_12_34	T01	Yes				Yes			2	100	25	0	0	8	32	65074	65050	6.85e-07	50.1
clean_rmdup_total_ncbi_gtdb_archaea_ref.part_027.fna::GCA_016840695.1_genomic_JAEORV010000149.1MAG:CandidatusLokiarchaeotaarchaeonisolateYap150.bin8.212contig-145_39527,wholegenomeshotgunsequence:CRT:459	Asgardarchaeota	TARA_MED_NCLDV_00114_000000000027	M01								0	96.429	28	1	0	1	28	3915	3888	2.84e-06	48.1
clean_rmdup_total_ncbi_gtdb_archaea_ref.part_030.fna::GCA_017935945.1_genomic_JAGBGN010000063.1MAG:CandidatusMethanomethylophilaceaearchaeonisolateRGIG9098Water_deer_Rectum.Co__c710906,wholegenomeshotgunsequence:CRT:328	Thermoplasmatota	Mirus_GRO_16_96	T01	Yes				Yes			2	96.875	32	0	1	2	32	86461	86492	3.22e-06	48.1
clean_rmdup_total_ncbi_gtdb_archaea_ref.part_030.fna::GCA_017935945.1_genomic_JAGBGN010000063.1MAG:CandidatusMethanomethylophilaceaearchaeonisolateRGIG9098Water_deer_Rectum.Co__c710906,wholegenomeshotgunsequence:CRT:328	Thermoplasmatota	TARA_MED_NCLDV_00069_000000000018	M03								0	100	26	0	0	6	31	5710	5735	2.07e-07	52
clean_rmdup_total_ncbi_gtdb_archaea_ref.part_031.fna::GCA_018304055.1_genomic_JAGVWY010000046.1CandidatusPacearchaeotaarchaeonisolateRIFCSPLOWO2_02_FULL_30_10rifcsplowo2_02_scaffold_3445,wholegenomeshotgunsequence:CRT:429	Nanobdellota	TARA_MED_NCLDV_00076_000000000007	M04								0	100	29	0	0	4	32	43	15	2.68e-09	58
clean_rmdup_total_ncbi_gtdb_archaea_ref.part_033.fna::GCA_018830205.1_genomic_JAHJSX010000064.1MAG:archaeonisolateOS_PC_MetaG.mb.32OS_PC_MetaG.mb.32_k141_310376,wholegenomeshotgunsequence:CRT:442	Hydrothermarchaeota	TARA_MED_NCLDV_00072_000000000036	M01								0	96.296	27	1	0	2	28	167	193	6.62e-06	46.1
clean_rmdup_total_ncbi_gtdb_archaea_ref.part_037.fna::GCA_021161055.1_genomic_JAGHBI010000040.1MAG:CandidatusDiapherotritesarchaeonisolateAUK252PB_MBMC_206_c_000000000018,wholegenomeshotgunsequence:CRT:352	Iainarchaeota	TARA_AON_NCLDV_00065_000000000011	M03								0	94.444	36	0	1	5	40	4069	4036	8.49e-07	50.1
clean_rmdup_total_ncbi_gtdb_archaea_ref.part_037.fna::GCA_021161055.1_genomic_JAGHBI010000040.1MAG:CandidatusDiapherotritesarchaeonisolateAUK252PB_MBMC_206_c_000000000018,wholegenomeshotgunsequence:CRT:352	Iainarchaeota	Mirus_AS_1_8	T01	Yes							1	96.429	28	1	0	3	30	119874	119901	3.35e-06	48.1
clean_rmdup_total_ncbi_gtdb_archaea_ref.part_045.fna::GCA_023659935.1_genomic_JAGXOK010000014.1CandidatusAenigmarchaeotaarchaeonLH_S6NODE_14_length_20665_cov_26.501262,wholegenomeshotgunsequence:CRT:411	Aenigmatarchaeota	TARA_PON_NCLDV_00021_000000000011	M01								0	100	24	0	0	5	28	3918	3941	3.87e-06	48.1
clean_rmdup_total_ncbi_gtdb_archaea_ref.part_045.fna::GCA_023659935.1_genomic_JAGXOK010000014.1CandidatusAenigmarchaeotaarchaeonLH_S6NODE_14_length_20665_cov_26.501262,wholegenomeshotgunsequence:CRT:553	Aenigmatarchaeota	TARA_MED_NCLDV_00048_000000000001	M02								0	100	24	0	0	3	26	29259	29282	2.84e-06	48.1
clean_rmdup_total_ncbi_gtdb_archaea_ref.part_049.fna::GCA_026712925.1_genomic_JAPOPJ010000062.1MAG:ThaumarchaeotaarchaeonisolateAPA_bin_56c_000000387489,wholegenomeshotgunsequence:CRT:1014	Thermoproteota	23_AprE_contigs_gt2500_contig_112_segment0_pilon	A06	Yes	Yes						2	100	30	0	0	2	31	409995	409966	5.42e-10	60
clean_rmdup_total_ncbi_gtdb_archaea_ref.part_049.fna::GCA_026712925.1_genomic_JAPOPJ010000062.1MAG:ThaumarchaeotaarchaeonisolateAPA_bin_56c_000000387489,wholegenomeshotgunsequence:CRT:1014	Thermoproteota	21_MarE_contigs_gt2500_contig_20743_segment0_pilon	A06	Yes							1	100	30	0	0	2	31	96	125	5.42e-10	60
clean_rmdup_total_ncbi_gtdb_archaea_ref.part_050.fna::GCA_027017165.1_genomic_JALURF010000035.1MAG:ThermofilaceaearchaeonisolateS146_metabat2_scaf2bin.032_VBS146_NODE_14338_length_5865_cov_1.554026,wholegenomeshotgunsequence:CRT:96	Thermoproteota	TARA_ARC_NCLDV_00178_000000000002	M05								0	100	25	0	0	8	32	4140	4116	5.55e-07	50.1
clean_rmdup_total_ncbi_gtdb_archaea_ref.part_054.fna::GCA_028572065.1_genomic_JAPVWK010000223.1MAG:MethanophagalesarchaeonisolateHMR2_5HMR2_5_000000000223,wholegenomeshotgunsequence:CRT:171	Halobacteriota	Mirus_FOR_4_43	A03	Yes	Yes		Yes				3	96.667	30	1	0	1	30	96730	96759	1.32e-07	52
clean_rmdup_total_ncbi_gtdb_archaea_ref.part_054.fna::GCA_028572065.1_genomic_JAPVWK010000223.1MAG:MethanophagalesarchaeonisolateHMR2_5HMR2_5_000000000223,wholegenomeshotgunsequence:CRT:171	Halobacteriota	Mirus_FOR_2_101	A03	Yes	Yes						2	96.429	28	1	0	3	30	12179	12206	2.06e-06	48.1
clean_rmdup_total_ncbi_gtdb_archaea_ref.part_057.fna::GCA_029263715.1_genomic_JAJUFP010000008.1MAG:Nitrososphaerasp.isolatebin14k141_494067_length_108786_cov_37.3287,wholegenomeshotgunsequence:CRT:1711	Thermoproteota	17_JanE_contigs_gt2500_contig_7370_segment0_pilon	A06	Yes	Yes						2	96.552	29	1	0	2	30	190992	191020	7.83e-07	50.1
clean_rmdup_total_ncbi_gtdb_archaea_ref.part_057.fna::GCA_029263715.1_genomic_JAJUFP010000008.1MAG:Nitrososphaerasp.isolatebin14k141_494067_length_108786_cov_37.3287,wholegenomeshotgunsequence:CRT:1711	Thermoproteota	15_DecE_contigs_gt2500_contig_5685_segment0_pilon	A06	Yes	Yes						2	96.552	29	1	0	2	30	52544	52516	7.83e-07	50.1
clean_rmdup_total_ncbi_gtdb_archaea_ref.part_057.fna::GCA_029263715.1_genomic_JAJUFP010000008.1MAG:Nitrososphaerasp.isolatebin14k141_494067_length_108786_cov_37.3287,wholegenomeshotgunsequence:CRT:1711	Thermoproteota	TARA_PSW_NCLDV_00040_000000000006	M01								0	100	24	0	0	1	24	3387	3410	3.1e-06	48.1
clean_rmdup_total_ncbi_gtdb_archaea_ref.part_057.fna::GCA_029263715.1_genomic_JAJUFP010000008.1MAG:Nitrososphaerasp.isolatebin14k141_494067_length_108786_cov_37.3287,wholegenomeshotgunsequence:CRT:1711	Thermoproteota	08_AugH_contigs_gt2500_contig_1968_segment0_pilon	A03	Yes	Yes						2	100	24	0	0	6	29	15221	15198	3.1e-06	48.1
clean_rmdup_total_ncbi_gtdb_archaea_ref.part_057.fna::GCA_029263715.1_genomic_JAJUFP010000008.1MAG:Nitrososphaerasp.isolatebin14k141_494067_length_108786_cov_37.3287,wholegenomeshotgunsequence:CRT:1711	Thermoproteota	03_JunE_contigs_gt2500_contig_13205_segment0_pilon	A06	Yes	Yes						2	100	24	0	0	1	24	82183	82160	3.1e-06	48.1
clean_rmdup_total_ncbi_gtdb_archaea_ref.part_059.fna::GCA_029984855.1_genomic_JARQZL010000089.1MAG:ArchaeoglobalesarchaeonisolateINS_M23_B45DNNIEKAA_89,wholegenomeshotgunsequence:CRT:282	Halobacteriota	CM015708.1	E04	Yes	Yes		Yes	Yes	Yes		5	100	24	0	0	13	36	85617	85594	2.71e-06	48.1
clean_rmdup_total_ncbi_gtdb_archaea_ref.part_059.fna::GCA_029984855.1_genomic_JARQZL010000089.1MAG:ArchaeoglobalesarchaeonisolateINS_M23_B45DNNIEKAA_89,wholegenomeshotgunsequence:CRT:282	Halobacteriota	CAJHUC010000281.1	E04	Yes	Yes		Yes	Yes	Yes	Yes	6	100	24	0	0	13	36	221532	221509	2.71e-06	48.1
clean_rmdup_total_ncbi_gtdb_archaea_ref.part_059.fna::GCA_029984855.1_genomic_JARQZL010000089.1MAG:ArchaeoglobalesarchaeonisolateINS_M23_B45DNNIEKAA_89,wholegenomeshotgunsequence:CRT:282	Halobacteriota	Mirus_WET_1_17	A02	Yes							1	100	24	0	0	13	36	13093	13116	2.71e-06	48.1
clean_rmdup_total_ncbi_gtdb_archaea_ref.part_071.fna::GCA_034723935.1_genomic_JAYEPK010000149.1MAG:CandidatusThermoplasmatotaarchaeonisolateMAG002MAG002_149,wholegenomeshotgunsequence:CRT:103	Thermoplasmatota	TARA_ARC_NCLDV_00054_000000000001	M02								0	100	27	0	0	1	27	3964	3938	9.82e-08	54
clean_rmdup_total_ncbi_gtdb_archaea_ref.part_071.fna::GCA_034723935.1_genomic_JAYEPK010000149.1MAG:CandidatusThermoplasmatotaarchaeonisolateMAG002MAG002_149,wholegenomeshotgunsequence:CRT:107	Thermoplasmatota	TARA_ARC_NCLDV_00054_000000000001	M02								0	100	26	0	0	2	27	3963	3938	1.98e-07	52
clean_rmdup_total_ncbi_gtdb_archaea_ref.part_082.fna::GCA_038046265.1_genomic_JBBSWN010000033.1MAG:NanoarchaeotaarchaeonisolateH51-bin052_1H51_bin052_1_000000000033,wholegenomeshotgunsequence:CRT:39	Nanobdellota	TARA_PSW_NCLDV_00066_000000000004	M02								0	100	26	0	0	11	36	1140	1115	2.31e-07	52
clean_rmdup_total_ncbi_gtdb_archaea_ref.part_082.fna::GCA_038046265.1_genomic_JBBSWN010000033.1MAG:NanoarchaeotaarchaeonisolateH51-bin052_1H51_bin052_1_000000000033,wholegenomeshotgunsequence:CRT:1752	Nanobdellota	Mirus_AS_1_8	T01	Yes							1	100	29	0	0	9	37	130635	130663	2.95e-09	58
clean_rmdup_total_ncbi_gtdb_archaea_ref.part_082.fna::GCA_038046265.1_genomic_JBBSWN010000033.1MAG:NanoarchaeotaarchaeonisolateH51-bin052_1H51_bin052_1_000000000033,wholegenomeshotgunsequence:CRT:1752	Nanobdellota	TARA_PON_NCLDV_00034_000000000002	M03		Yes						1	100	25	0	0	9	33	62323	62299	7.18e-07	50.1
clean_rmdup_total_ncbi_gtdb_archaea_ref.part_082.fna::GCA_038046265.1_genomic_JBBSWN010000033.1MAG:NanoarchaeotaarchaeonisolateH51-bin052_1H51_bin052_1_000000000033,wholegenomeshotgunsequence:CRT:1752	Nanobdellota	Mirus_GRO_16_96	T01	Yes				Yes			2	100	25	0	0	9	33	4144	4120	7.18e-07	50.1
clean_rmdup_total_ncbi_gtdb_archaea_ref.part_093.fna::GCA_946545675.1_genomic_CAMNNR010000134.1MAG:unculturedThermoplasmataarchaeonisolateSRR873597_bin.155_metaWRAP_v1.3_MAGgenomeassembly,contig:NODE.97150_length_3278_cov_4_511015,wholegenomeshotgunsequence:CRT:867	Thermoplasmatota	Mirus_GRO_11_46	A03	Yes							1	100	24	0	0	1	24	7798	7821	2.32e-06	48.1
clean_rmdup_total_ncbi_gtdb_archaea_ref.part_093.fna::GCA_946545675.1_genomic_CAMNNR010000134.1MAG:unculturedThermoplasmataarchaeonisolateSRR873597_bin.155_metaWRAP_v1.3_MAGgenomeassembly,contig:NODE.97150_length_3278_cov_4_511015,wholegenomeshotgunsequence:CRT:867	Thermoplasmatota	Mirus_WET_4_19	T03	Yes							1	96.296	27	1	0	1	27	14438	14464	9.17e-06	46.1
clean_rmdup_total_ncbi_gtdb_archaea_ref.part_093.fna::GCA_946545675.1_genomic_CAMNNR010000134.1MAG:unculturedThermoplasmataarchaeonisolateSRR873597_bin.155_metaWRAP_v1.3_MAGgenomeassembly,contig:NODE.97150_length_3278_cov_4_511015,wholegenomeshotgunsequence:CRT:867	Thermoplasmatota	24_AprH_contigs_gt2500_contig_9892_segment0_pilon	A06	Yes	Yes						2	100	23	0	0	1	23	59265	59287	9.17e-06	46.1
clean_rmdup_total_ncbi_gtdb_archaea_ref.part_093.fna::GCA_946545675.1_genomic_CAMNNR010000134.1MAG:unculturedThermoplasmataarchaeonisolateSRR873597_bin.155_metaWRAP_v1.3_MAGgenomeassembly,contig:NODE.97150_length_3278_cov_4_511015,wholegenomeshotgunsequence:CRT:867	Thermoplasmatota	23_AprE_contigs_gt2500_contig_112_segment0_pilon	A06	Yes	Yes						2	100	23	0	0	1	23	164652	164630	9.17e-06	46.1
clean_rmdup_total_ncbi_gtdb_archaea_ref.part_093.fna::GCA_946545675.1_genomic_CAMNNR010000134.1MAG:unculturedThermoplasmataarchaeonisolateSRR873597_bin.155_metaWRAP_v1.3_MAGgenomeassembly,contig:NODE.97150_length_3278_cov_4_511015,wholegenomeshotgunsequence:CRT:867	Thermoplasmatota	22_MarH_contigs_gt2500_contig_970_segment0_pilon	A06	Yes	Yes						2	100	23	0	0	1	23	90223	90245	9.17e-06	46.1
clean_rmdup_total_ncbi_gtdb_archaea_ref.part_093.fna::GCA_946545675.1_genomic_CAMNNR010000134.1MAG:unculturedThermoplasmataarchaeonisolateSRR873597_bin.155_metaWRAP_v1.3_MAGgenomeassembly,contig:NODE.97150_length_3278_cov_4_511015,wholegenomeshotgunsequence:CRT:867	Thermoplasmatota	21_MarE_contigs_gt2500_contig_3530_segment0_pilon	A06	Yes	Yes						2	100	23	0	0	1	23	59195	59173	9.17e-06	46.1
clean_rmdup_total_ncbi_gtdb_archaea_ref.part_093.fna::GCA_946545675.1_genomic_CAMNNR010000134.1MAG:unculturedThermoplasmataarchaeonisolateSRR873597_bin.155_metaWRAP_v1.3_MAGgenomeassembly,contig:NODE.97150_length_3278_cov_4_511015,wholegenomeshotgunsequence:CRT:867	Thermoplasmatota	20_FebH_contigs_gt2500_contig_8072_segment0_pilon	A06	Yes	Yes						2	100	23	0	0	1	23	29397	29419	9.17e-06	46.1
clean_rmdup_total_ncbi_gtdb_archaea_ref.part_093.fna::GCA_946545675.1_genomic_CAMNNR010000134.1MAG:unculturedThermoplasmataarchaeonisolateSRR873597_bin.155_metaWRAP_v1.3_MAGgenomeassembly,contig:NODE.97150_length_3278_cov_4_511015,wholegenomeshotgunsequence:CRT:867	Thermoplasmatota	19_FebE_contigs_gt2500_contig_3519_segment0_pilon	A06	Yes	Yes						2	100	23	0	0	1	23	88401	88423	9.17e-06	46.1
clean_rmdup_total_ncbi_gtdb_archaea_ref.part_093.fna::GCA_946545675.1_genomic_CAMNNR010000134.1MAG:unculturedThermoplasmataarchaeonisolateSRR873597_bin.155_metaWRAP_v1.3_MAGgenomeassembly,contig:NODE.97150_length_3278_cov_4_511015,wholegenomeshotgunsequence:CRT:867	Thermoplasmatota	17_JanE_contigs_gt2500_contig_7838_segment0_pilon	A06	Yes	Yes						2	100	23	0	0	1	23	94631	94653	9.17e-06	46.1
clean_rmdup_total_ncbi_gtdb_archaea_ref.part_093.fna::GCA_946545675.1_genomic_CAMNNR010000134.1MAG:unculturedThermoplasmataarchaeonisolateSRR873597_bin.155_metaWRAP_v1.3_MAGgenomeassembly,contig:NODE.97150_length_3278_cov_4_511015,wholegenomeshotgunsequence:CRT:867	Thermoplasmatota	02_MayH_contigs_gt2500_contig_9512_segment0_pilon	A06	Yes							1	100	23	0	0	1	23	19295	19317	9.17e-06	46.1
clean_rmdup_total_ncbi_gtdb_archaea_ref.part_093.fna::GCA_946545675.1_genomic_CAMNNR010000134.1MAG:unculturedThermoplasmataarchaeonisolateSRR873597_bin.155_metaWRAP_v1.3_MAGgenomeassembly,contig:NODE.97150_length_3278_cov_4_511015,wholegenomeshotgunsequence:CRT:867	Thermoplasmatota	01_MayE_contigs_gt2500_contig_13198_segment0_pilon	A06	Yes							1	100	23	0	0	1	23	33010	32988	9.17e-06	46.1
clean_rmdup_total_ncbi_gtdb_archaea_ref.part_095.fna::GCA_964014905.1_genomic_CAXHCG010000271.1MAGTPA_asm:unculturedCandidatusPoseidonialesarchaeonisolateSRR12479975_maxbin2_4genomeassembly,contig:ERZ4874294.9259,wholegenomeshotgunsequence:CRT:5800	Thermoplasmatota	TARA_ION_NCLDV_00011_000000000002	M02		Yes				Yes		2	96.552	29	1	0	7	35	15845	15873	6.53e-07	50.1
clean_rmdup_total_ncbi_gtdb_archaea_ref.part_095.fna::GCA_964014905.1_genomic_CAXHCG010000271.1MAGTPA_asm:unculturedCandidatusPoseidonialesarchaeonisolateSRR12479975_maxbin2_4genomeassembly,contig:ERZ4874294.9259,wholegenomeshotgunsequence:CRT:5800	Thermoplasmatota	TARA_AON_NCLDV_00040_000000000013	M02								0	96.552	29	1	0	7	35	1463	1491	6.53e-07	50.1
clean_rmdup_total_ncbi_gtdb_archaea_ref.part_095.fna::GCA_964014905.1_genomic_CAXHCG010000271.1MAGTPA_asm:unculturedCandidatusPoseidonialesarchaeonisolateSRR12479975_maxbin2_4genomeassembly,contig:ERZ4874294.9259,wholegenomeshotgunsequence:CRT:5800	Thermoplasmatota	TARA_ARC_NCLDV_00035_000000000001	M02								0	100	24	0	0	12	35	689	712	2.58e-06	48.1
clean_rmdup_total_ncbi_gtdb_archaea_ref.part_095.fna::GCA_964014905.1_genomic_CAXHCG010000271.1MAGTPA_asm:unculturedCandidatusPoseidonialesarchaeonisolateSRR12479975_maxbin2_4genomeassembly,contig:ERZ4874294.9259,wholegenomeshotgunsequence:CRT:7041	Thermoplasmatota	Mirus_AS_1_8	T01	Yes							1	100	26	0	0	5	30	62944	62969	1.73e-07	52
clean_rmdup_total_ncbi_gtdb_archaea_ref.part_095.fna::GCA_964014905.1_genomic_CAXHCG010000271.1MAGTPA_asm:unculturedCandidatusPoseidonialesarchaeonisolateSRR12479975_maxbin2_4genomeassembly,contig:ERZ4874294.9259,wholegenomeshotgunsequence:CRT:14189	Thermoplasmatota	TARA_MED_NCLDV_00125_000000000010	M01								0	100	24	0	0	13	36	1710	1733	2.84e-06	48.1
clean_rmdup_total_ncbi_gtdb_archaea_ref.part_096.fna::GCF_000739575.1_genomic_NZ_BBJO01000079.1HalobellusrufusstrainCBA1103,wholegenomeshotgunsequence:CRT:1661	Halobacteriota	TARA_MED_NCLDV_00107_000000000009	M01								0	96.429	28	1	0	2	29	1271	1244	4.9e-06	48.1
clean_rmdup_total_ncbi_gtdb_archaea_ref.part_096.fna::GCF_000739575.1_genomic_NZ_BBJO01000079.1HalobellusrufusstrainCBA1103,wholegenomeshotgunsequence:CRT:1661	Halobacteriota	TARA_AON_NCLDV_00025_000000000001	M03								0	96.429	28	1	0	2	29	16824	16797	4.9e-06	48.1
clean_rmdup_total_ncbi_gtdb_archaea_ref.part_097.fna::GCF_003383095.1_genomic_NZ_PSYW01000077.1Haloferaxsp.Atlit-12NP_contig000090,wholegenomeshotgunsequence:CRT:2055	Halobacteriota	22_MarH_contigs_gt2500_contig_2034_segment0_pilon	A05	Yes	Yes						2	100	24	0	0	12	35	159398	159375	3.48e-06	48.1
clean_rmdup_total_ncbi_gtdb_archaea_ref.part_097.fna::GCF_003383095.1_genomic_NZ_PSYW01000077.1Haloferaxsp.Atlit-12NP_contig000090,wholegenomeshotgunsequence:CRT:2055	Halobacteriota	17_JanE_contigs_gt2500_contig_5800_segment0_pilon	A05	Yes	Yes						2	100	24	0	0	12	35	132971	132948	3.48e-06	48.1
clean_rmdup_total_ncbi_gtdb_archaea_ref.part_097.fna::GCF_003383095.1_genomic_NZ_PSYW01000077.1Haloferaxsp.Atlit-12NP_contig000090,wholegenomeshotgunsequence:CRT:9543	Halobacteriota	TARA_SOC_NCLDV_00004_000000000019	M02								0	100	29	0	0	1	29	15282	15310	2.14e-09	58
clean_rmdup_total_ncbi_gtdb_archaea_ref.part_097.fna::GCF_003383095.1_genomic_NZ_PSYW01000077.1Haloferaxsp.Atlit-12NP_contig000090,wholegenomeshotgunsequence:CRT:9543	Halobacteriota	TARA_MED_NCLDV_00103_000000000008	M03								0	100	29	0	0	1	29	542	514	2.14e-09	58
clean_rmdup_total_ncbi_gtdb_archaea_ref.part_097.fna::GCF_003383095.1_genomic_NZ_PSYW01000077.1Haloferaxsp.Atlit-12NP_contig000090,wholegenomeshotgunsequence:CRT:9543	Halobacteriota	TARA_ARC_NCLDV_00106_000000000028	M02								0	100	26	0	0	1	26	1439	1414	1.32e-07	52
clean_rmdup_total_ncbi_gtdb_archaea_ref.part_097.fna::GCF_003383095.1_genomic_NZ_PSYW01000077.1Haloferaxsp.Atlit-12NP_contig000090,wholegenomeshotgunsequence:CRT:9543	Halobacteriota	TARA_ARC_NCLDV_00035_000000000015	M02								0	100	25	0	0	7	31	17193	17217	5.22e-07	50.1
clean_rmdup_total_ncbi_gtdb_archaea_ref.part_097.fna::GCF_003383095.1_genomic_NZ_PSYW01000077.1Haloferaxsp.Atlit-12NP_contig000090,wholegenomeshotgunsequence:CRT:9756	Halobacteriota	17_JanE_contigs_gt2500_contig_8242_segment0_pilon	A05	Yes							1	96.429	28	1	0	1	28	81121	81148	2.58e-06	48.1
clean_rmdup_total_ncbi_gtdb_archaea_ref.part_097.fna::GCF_003383095.1_genomic_NZ_PSYW01000077.1Haloferaxsp.Atlit-12NP_contig000090,wholegenomeshotgunsequence:CRT:9756	Halobacteriota	15_DecE_contigs_gt2500_contig_7449_segment0_pilon	A05	Yes							1	96.429	28	1	0	1	28	152919	152946	2.58e-06	48.1
clean_rmdup_total_ncbi_gtdb_archaea_ref.part_097.fna::GCF_003383095.1_genomic_NZ_PSYW01000077.1Haloferaxsp.Atlit-12NP_contig000090,wholegenomeshotgunsequence:CRT:9756	Halobacteriota	20_FebH_contigs_gt2500_contig_4490_segment0_pilon	A05	Yes							1	96.429	28	1	0	1	28	71539	71512	2.58e-06	48.1
clean_rmdup_total_ncbi_gtdb_archaea_ref.part_097.fna::GCF_003383095.1_genomic_NZ_PSYW01000077.1Haloferaxsp.Atlit-12NP_contig000090,wholegenomeshotgunsequence:CRT:9756	Halobacteriota	19_FebE_contigs_gt2500_contig_2624_segment0_pilon	A05	Yes							1	96.429	28	1	0	1	28	245687	245660	2.58e-06	48.1
clean_rmdup_total_ncbi_gtdb_archaea_ref.part_098.fna::GCF_015523185.1_genomic_NZ_WAKV01000033.1MAG:Thermococcussp.isolateS013_43k151_20403,wholegenomeshotgunsequence:CRT:9082	Methanobacteriota_B	TARA_ARC_NCLDV_00023_000000000031	M02								0	100	24	0	0	8	31	932	909	2.06e-06	48.1
clean_rmdup_total_ncbi_gtdb_archaea_ref.part_099.fna::GCF_029250625.1_genomic_NZ_JAQXEX010000053.1MAG:Poseidoniasp.isolatecluster2-bin.125k141_3278742,wholegenomeshotgunsequence:CRT:6871	Thermoplasmatota	19_FebE_contigs_gt2500_contig_17675_segment0_pilon	A06	Yes	Yes						2	100	25	0	0	1	25	26635	26611	8.16e-07	50.1
clean_rmdup_total_ncbi_gtdb_archaea_ref.part_099.fna::GCF_029250625.1_genomic_NZ_JAQXEX010000053.1MAG:Poseidoniasp.isolatecluster2-bin.125k141_3278742,wholegenomeshotgunsequence:CRT:6871	Thermoplasmatota	20_FebH_contigs_gt2500_contig_6188_segment0_pilon	A06	Yes	Yes						2	100	24	0	0	2	25	136867	136844	3.22e-06	48.1
clean_rmdup_total_ncbi_gtdb_archaea_ref.part_099.fna::GCF_029250625.1_genomic_NZ_JAQXEX010000053.1MAG:Poseidoniasp.isolatecluster2-bin.125k141_3278742,wholegenomeshotgunsequence:CRT:7228	Thermoplasmatota	TARA_MED_NCLDV_00098_000000000004	M04								0	100	24	0	0	11	34	17704	17727	2.71e-06	48.1
clean_rmdup_total_ncbi_gtdb_archaea_ref.part_100.fna::GCF_900114585.1_genomic_NZ_FOTL01000043.1MethanobrevibacterolleyaestrainDSM16632,wholegenomeshotgunsequence:CRT:631	Methanobacteriota	CM015708.1	E04	Yes	Yes		Yes	Yes	Yes		5	100	25	0	0	4	28	123972	123996	6.85e-07	50.1
clean_rmdup_total_ncbi_gtdb_archaea_ref.part_100.fna::GCF_900114585.1_genomic_NZ_FOTL01000043.1MethanobrevibacterolleyaestrainDSM16632,wholegenomeshotgunsequence:CRT:3136	Methanobacteriota	Mirus_EST_11_45	A01	Yes	Yes		Yes	Yes		Yes	5	100	24	0	0	7	30	50389	50366	2.71e-06	48.1
clean_rmdup_total_ncbi_gtdb_archaea_ref.part_100.fna::GCF_900114585.1_genomic_NZ_FOTL01000043.1MethanobrevibacterolleyaestrainDSM16632,wholegenomeshotgunsequence:CRT:3136	Methanobacteriota	Mirus_EST_10_47	A01	Yes	Yes		Yes	Yes		Yes	5	100	24	0	0	7	30	52924	52901	2.71e-06	48.1
output_clean_rmdup_total_ncbi_gtdb_archaea_ref.part_097_CRISPR1_SPACER5_985547_985620_____GCF_009601705.1_genomic_NZ_CP045687.1	Thermoproteota	24_AprH_contigs_gt2500_contig_9892_segment0_pilon	A06	Yes	Yes						2	98.246	57	1	0	1	57	213075	213019	3.64e-23	105
output_clean_rmdup_total_ncbi_gtdb_archaea_ref.part_097_CRISPR1_SPACER5_985547_985620_____GCF_009601705.1_genomic_NZ_CP045687.1	Thermoproteota	TARA_SOC_NCLDV_00009_000000000019	M02		Yes						1	98.214	56	1	0	1	56	5095	5040	1.44e-22	103
output_clean_rmdup_total_ncbi_gtdb_archaea_ref.part_097_CRISPR1_SPACER5_985547_985620_____GCF_009601705.1_genomic_NZ_CP045687.1	Thermoproteota	20_FebH_contigs_gt2500_contig_8072_segment0_pilon	A06	Yes	Yes						2	98.214	56	1	0	1	56	167600	167545	1.44e-22	103
output_clean_rmdup_total_ncbi_gtdb_archaea_ref.part_097_CRISPR1_SPACER5_985547_985620_____GCF_009601705.1_genomic_NZ_CP045687.1	Thermoproteota	03_JunE_contigs_gt2500_contig_13205_segment0_pilon	A06	Yes	Yes						2	98.214	56	1	0	1	56	27741	27686	1.44e-22	103
output_clean_rmdup_total_ncbi_gtdb_archaea_ref.part_097_CRISPR1_SPACER5_985547_985620_____GCF_009601705.1_genomic_NZ_CP045687.1	Thermoproteota	15_DecE_contigs_gt2500_contig_7449_segment0_pilon	A05	Yes							1	100	34	0	0	24	57	125802	125769	7.92e-12	67.9
output_clean_rmdup_total_ncbi_gtdb_archaea_ref.part_097_CRISPR1_SPACER5_985547_985620_____GCF_009601705.1_genomic_NZ_CP045687.1	Thermoproteota	Mirus_AS_2_17	T02	Yes							1	100	26	0	0	33	58	50641	50666	4.71e-07	52
output_clean_rmdup_total_ncbi_gtdb_archaea_ref.part_097_CRISPR1_SPACER5_985547_985620_____GCF_009601705.1_genomic_NZ_CP045687.1	Thermoproteota	TARA_ARC_NCLDV_00054_000000000012	M02								0	96.429	28	1	0	1	28	1644	1671	7.35e-06	48.1
output_clean_rmdup_total_ncbi_gtdb_archaea_ref.part_097_CRISPR1_SPACER5_985547_985620_____GCF_009601705.1_genomic_NZ_CP045687.1	Thermoproteota	Mirus_AL_3_109	T03	Yes				Yes			2	96.429	28	1	0	1	28	6156	6183	7.35e-06	48.1
output_groundwater_part5_SRR22388156_bin.65.txt_CRISPR1_SPACER2_100486_100523_____groundwater_part5_SRR22388156_bin.65_k141_1865787	Methanobacteriota	TARA_MED_NCLDV_00048_000000000002	M02								0	96.429	28	1	0	6	33	9927	9954	2.84e-06	48.1
output_hotspring_SRR25522558_bin.58.txt_CRISPR1_SPACER65_4512_4550_____hotspring_SRR25522558_bin.58_k141_151899	Thermoproteota	23_AprE_contigs_gt2500_contig_5556_segment0_pilon	T02	Yes	Yes		Yes	Yes			4	96.552	29	1	0	9	37	72991	72963	7.51e-07	50.1
crh_estuary_Wang9.bin.12.permissive::crh_estuary_Wang9.bin.12.permissive_NODE_1_length_99143_cov_5.736812:CRT:2	Thermoproteota	TARA_PSW_NCLDV_00066_000000000004	M02								0	100	26	0	0	11	36	1140	1115	2.15e-07	52
hotspring_SRR25522552_bin.5::hotspring_SRR25522552_bin.5_k141_1561913:CRT:5	Thermoproteota	TARA_ARC_NCLDV_00078_000000000014	M05		Yes						1	100	25	0	0	1	25	7326	7350	8.81e-07	50.1
hotspring_SRR25522552_bin.5::hotspring_SRR25522552_bin.5_k141_1561913:CRT:5	Thermoproteota	TARA_SOC_NCLDV_00002_000000000009	M02								0	100	25	0	0	1	25	372	348	8.81e-07	50.1
hydrothermal_vent_SRR7968110_bin.6::hydrothermal_vent_SRR7968110_bin.6_k141_17617:CRT:4	Methanobacteriota	TARA_PSE_NCLDV_00013_000000000043	M01								0	100	24	0	0	10	33	5732	5709	2.84e-06	48.1
mabin_S258bin.8::mabin_S258bin.8k141_1667065:CRT:2	Thermoproteota	CAJHUC010000281.1	E04	Yes	Yes		Yes	Yes	Yes	Yes	6	100	24	0	0	2	25	93149	93172	2.06e-06	48.1
mabin_SRR5195109rbin.31::mabin_SRR5195109rbin.31k141_1610869:CRT:5	Thermoproteota	22_MarH_contigs_gt2500_contig_19585_segment0_pilon	A06	Yes							1	96.429	28	1	0	25	52	50245	50218	9.8e-06	48.1
mabin_SRR5195109rbin.31::mabin_SRR5195109rbin.31k141_1610869:CRT:5	Thermoproteota	20_FebH_contigs_gt2500_contig_6188_segment0_pilon	A06	Yes	Yes						2	96.429	28	1	0	25	52	181125	181098	9.8e-06	48.1
mabin_SRR5195109rbin.31::mabin_SRR5195109rbin.31k141_1610869:CRT:5	Thermoproteota	19_FebE_contigs_gt2500_contig_17675_segment0_pilon	A06	Yes	Yes						2	96.429	28	1	0	25	52	71789	71762	9.8e-06	48.1
mabin_SRR5195109rbin.31::mabin_SRR5195109rbin.31k141_1610869:CRT:5	Thermoproteota	17_JanE_contigs_gt2500_contig_22705_segment0_pilon	A06	Yes	Yes						2	96.429	28	1	0	25	52	40627	40600	9.8e-06	48.1
mabin_SRR5195109rbin.31::mabin_SRR5195109rbin.31k141_1610869:CRT:5	Thermoproteota	09_SepE_contigs_gt2500_contig_6941_segment0_pilon	A06	Yes							1	96.429	28	1	0	25	52	86170	86197	9.8e-06	48.1
mabin_SRR5195114rbin.15::mabin_SRR5195114rbin.15k141_397974:CRT:5	Thermoproteota	TARA_ARC_NCLDV_00054_000000000001	M02								0	100	27	0	0	1	27	3964	3938	9.82e-08	54
mabin_SRR5195114rbin.15::mabin_SRR5195114rbin.15k141_397974:CRT:9	Thermoproteota	TARA_ARC_NCLDV_00054_000000000001	M02								0	100	26	0	0	2	27	3963	3938	1.98e-07	52
oil_reserver_SRR11866724_bin.9::oil_reserver_SRR11866724_bin.9_k141_39771:CRT:18	Thermoplasmatota	Mirus_AS_1_8	T01	Yes							1	100	24	0	0	10	33	40806	40829	2.84e-06	48.1
qingzanggaoyuan_2020_CC-20W-1-20m-1_bin.37.purify::qingzanggaoyuan_2020_CC-20W-1-20m-1_bin.37.purify_k141_67107:CRT:4	Thermoproteota	TARA_AON_NCLDV_00025_000000000011	M03	Yes							1	100	24	0	0	23	46	20811	20834	8.9e-06	48.1

## Sheet: Suppl Table 6
id	evalue	maker	taxonomy
mabin_SRR3990172rbin.57k141_614995_1	8.1e-18	Portal	Archaea;Asgardarchaeota;Heimdallarchaeia;Hodarchaeales;LC-3;g__LC-3;s__
GCA_002712495.1_ASM271249v1_genomic_PATU01000053.1_13	6.3e-11	Portal	Archaea; Methanobacteriati; Methanobacteriota.
GCA_002712495.1_ASM271249v1_genomic_PATU01000057.1_5	8.9e-30	Portal	Archaea; Methanobacteriati; Methanobacteriota
GCA_963934275.1_ERR3589592_concoct_62_genomic_CAWVYI010000004.1_13	4.6e-14	Portal	Archaea; Methanobacteriati; Methanobacteriota.
GCA_963934275.1_ERR3589592_concoct_62_genomic_CAWVYI010000014.1_15	3.3e-20	Portal	Archaea; Methanobacteriati; Methanobacteriota.

## Sheet: Suppl Table 7
sampleid	bioproject	ecosystem	Lat	Lon
SAMN35729406	PRJNA983538	Forest	50.86	4.72
SAMN35729407	PRJNA983538	Forest	50.86	4.72
SAMN35729408	PRJNA983538	Grassland	50.87	4.71
SAMN35729560	PRJNA983538	Agricultural Land	34.7678	111.769
SAMN35729561	PRJNA983538	Wetland	34.6433	113.571
SAMN35729562	PRJNA983538	Forest	22.4342	113.517
SAMN35729563	PRJNA983538	Agricultural Land	22.3675	113.581
SAMN35729564	PRJNA983538	Agricultural Land	25.2166	110.252
SAMN35729565	PRJNA983538	Agricultural Land	34.5547	113.483
SAMN35729566	PRJNA983538	Agricultural Land	25.07	110.306
SAMN35729567	PRJNA983538	Wetland	25.0733	110.293
SAMN35729568	PRJNA983538	Agricultural Land	25.0689	110.283
SAMN35729569	PRJNA983538	Forest	24.2019	109.369
SAMN35729570	PRJNA983538	Agricultural Land	34.4619	113.439
SAMN35729571	PRJNA983538	Grassland	24.1042	109.09
SAMN35729572	PRJNA983538	Agricultural Land	24.2836	109.408
SAMN35729573	PRJNA983538	Agricultural Land	22.9778	108.578
SAMN35729574	PRJNA983538	Agricultural Land	22.8653	108.338
SAMN35729575	PRJNA983538	Agricultural Land	22.9244	108.541
SAMN35729576	PRJNA983538	Agricultural Land	22.8889	108.373
SAMN35729577	PRJNA983538	Wetland	22.9261	108.373
SAMN35729578	PRJNA983538	Agricultural Land	26.3219	106.139
SAMN35729579	PRJNA983538	Grassland	34.1544	112.106
SAMN35729580	PRJNA983538	Forest	26.3208	106.139
SAMN35729581	PRJNA983538	Agricultural Land	26.3064	106.139
SAMN35729582	PRJNA983538	Agricultural Land	27.0428	107.023
SAMN35729583	PRJNA983538	Agricultural Land	27.0436	106.961
SAMN35729584	PRJNA983538	Agricultural Land	27.0428	107.023
SAMN35729585	PRJNA983538	Agricultural Land	27.0425	107.023
SAMN35729586	PRJNA983538	Agricultural Land	25.8128	107.177
SAMN35729587	PRJNA983538	Agricultural Land	34.1328	112.089
SAMN35729588	PRJNA983538	Agricultural Land	25.805	107.175
SAMN35729589	PRJNA983538	Agricultural Land	25.8619	107.13
SAMN35729590	PRJNA983538	Grassland	25.8044	107.185
SAMN35729591	PRJNA983538	Agricultural Land	25.8494	107.167
SAMN35729592	PRJNA983538	Agricultural Land	20.0344	110.338
SAMN35729593	PRJNA983538	Forest	18.3372	109.461
SAMN35729594	PRJNA983538	Forest	34.2422	112.203
SAMN35729595	PRJNA983538	Agricultural Land	37.9525	114.79
SAMN35729596	PRJNA983538	Forest	37.9103	114.346
SAMN35729597	PRJNA983538	Agricultural Land	37.8744	114.892
SAMN35729598	PRJNA983538	Agricultural Land	32.1633	114.113
SAMN35729599	PRJNA983538	Agricultural Land	34.2747	112.24
SAMN35729600	PRJNA983538	Forest	32.0744	114.118
SAMN35729601	PRJNA983538	Forest	35.3167	114.907
SAMN35729602	PRJNA983538	Wetland	35.2811	114.874
SAMN35729603	PRJNA983538	Grassland	35.2278	114.831
SAMN35729604	PRJNA983538	Agricultural Land	35.2047	114.749
SAMN35729605	PRJNA983538	Agricultural Land	35.3353	114.903
SAMN35729606	PRJNA983538	Agricultural Land	35.37	114.922
SAMN35729607	PRJNA983538	Agricultural Land	44.575	129.7
SAMN35729608	PRJNA983538	Agricultural Land	34.3283	112.3
SAMN35729609	PRJNA983538	Agricultural Land	44.5494	129.741
SAMN35729610	PRJNA983538	Agricultural Land	45.7467	126.593
SAMN35729611	PRJNA983538	Forest	47.3286	124.079
SAMN35729612	PRJNA983538	Wetland	47.2006	124.211
SAMN35729613	PRJNA983538	Agricultural Land	47.3239	124.088
SAMN35729614	PRJNA983538	Agricultural Land	46.6106	126.882
SAMN35729615	PRJNA983538	Forest	47.2944	129.426
SAMN35729616	PRJNA983538	Agricultural Land	30.1089	114.92
SAMN35729617	PRJNA983538	Forest	30.3967	109.572
SAMN35729618	PRJNA983538	Forest	30.1969	114.962
SAMN35729619	PRJNA983538	Agricultural Land	34.7822	111.765
SAMN35729620	PRJNA983538	Forest	32.3231	113.624
SAMN35729621	PRJNA983538	Wetland	29.5017	112.801
SAMN35729622	PRJNA983538	Agricultural Land	32.3242	113.625
SAMN35729623	PRJNA983538	Agricultural Land	45.0125	124.983
SAMN35729624	PRJNA983538	Grassland	45.1186	124.416
SAMN35729625	PRJNA983538	Agricultural Land	42.9444	128.446
SAMN35729626	PRJNA983538	Forest	42.4314	128.117
SAMN35729627	PRJNA983538	Agricultural Land	32.3242	113.625
SAMN35729628	PRJNA983538	Wetland	31.3228	120.351
SAMN35729629	PRJNA983538	Grassland	31.3239	120.353
SAMN35729630	PRJNA983538	Agricultural Land	32.9678	120.011
SAMN35729631	PRJNA983538	Agricultural Land	31.4597	120.248
SAMN35729632	PRJNA983538	Agricultural Land	31.5303	120.332
SAMN35729633	PRJNA983538	Grassland	32.3239	113.624
SAMN35729634	PRJNA983538	Agricultural Land	27.1653	115.098
SAMN35729635	PRJNA983538	Wetland	27.1342	114.992
SAMN35729636	PRJNA983538	Agricultural Land	27.0808	115.01
SAMN35729637	PRJNA983538	Agricultural Land	27.1172	115.051
SAMN35729638	PRJNA983538	Agricultural Land	29.7117	115.853
SAMN35729639	PRJNA983538	Forest	32.3183	110.02
SAMN35729640	PRJNA983538	Grassland	29.5806	115.93
SAMN35729641	PRJNA983538	Agricultural Land	28.7681	116.054
SAMN35729642	PRJNA983538	Agricultural Land	28.775	116.056
SAMN35729643	PRJNA983538	Grassland	28.7878	115.756
SAMN35729644	PRJNA983538	Agricultural Land	28.7569	115.928
SAMN35729645	PRJNA983538	Forest	27.0586	115.037
SAMN35729646	PRJNA983538	Agricultural Land	32.3458	110.024
SAMN35729647	PRJNA983538	Forest	28.7514	115.74
SAMN35729648	PRJNA983538	Wetland	28.6122	115.834
SAMN35729649	PRJNA983538	Forest	41.1292	124.142
SAMN35729650	PRJNA983538	Forest	41.8472	124.933
SAMN35729651	PRJNA983538	Agricultural Land	41.0158	122.405
SAMN35729652	PRJNA983538	Wetland	41.0158	122.405
SAMN35729653	PRJNA983538	Agricultural Land	41.0158	122.405
SAMN35729654	PRJNA983538	Agricultural Land	41.7711	123.438
SAMN35729655	PRJNA983538	Forest	41.9183	123.601
SAMN35729656	PRJNA983538	Wetland	41.9183	123.601
SAMN35729657	PRJNA983538	Agricultural Land	41.7708	123.439
SAMN35729658	PRJNA983538	Agricultural Land	41.6417	123.615
SAMN35729659	PRJNA983538	Agricultural Land	41.7711	123.438
SAMN35729660	PRJNA983538	Agricultural Land	37.4636	121.378
SAMN35729661	PRJNA983538	Forest	37.5247	121.384
SAMN35729662	PRJNA983538	Grassland	37.5253	121.386
SAMN35729663	PRJNA983538	Agricultural Land	36.08	120.364
SAMN35729664	PRJNA983538	Wetland	36.0644	120.104
SAMN35729665	PRJNA983538	Wetland	37.6531	112.746
SAMN35729666	PRJNA983538	Forest	37.5431	112.314
SAMN35729667	PRJNA983538	Forest	38.4042	112.746
SAMN35729668	PRJNA983538	Forest	32.6594	110.795
SAMN35729669	PRJNA983538	Agricultural Land	37.5117	112.332
SAMN35729670	PRJNA983538	Agricultural Land	37.4217	112.299
SAMN35729671	PRJNA983538	Agricultural Land	37.4217	112.299
SAMN35729672	PRJNA983538	Wetland	39.2203	113.389
SAMN35729673	PRJNA983538	Agricultural Land	39.2242	113.398
SAMN35729674	PRJNA983538	Grassland	38.7183	111.838
SAMN35729675	PRJNA983538	Agricultural Land	34.2525	108.983
SAMN35729676	PRJNA983538	Forest	29.2642	113.118
SAMN35729677	PRJNA983538	Wetland	34.4108	108.998
SAMN35729678	PRJNA983538	Agricultural Land	34.0497	108.909
SAMN35729679	PRJNA983538	Agricultural Land	34.4131	109.139
SAMN35729680	PRJNA983538	Forest	33.1817	113.86
SAMN35729681	PRJNA983538	Agricultural Land	28.8317	104.616
SAMN35729682	PRJNA983538	Agricultural Land	29.625	103.568
SAMN35729683	PRJNA983538	Wetland	27.8519	102.267
SAMN35729684	PRJNA983538	Grassland	27.8739	102.516
SAMN35729685	PRJNA983538	Agricultural Land	38.9847	117.15
SAMN35729686	PRJNA983538	Wetland	38.9964	117.14
SAMN35729687	PRJNA983538	Agricultural Land	38.9211	117.534
SAMN35729688	PRJNA983538	Forest	39.0736	117.15
SAMN35729689	PRJNA983538	Agricultural Land	39.2192	117.123
SAMN35729690	PRJNA983538	Agricultural Land	29.4358	113.017
SAMN35729691	PRJNA983538	Agricultural Land	39.0442	117.656
SAMN35729692	PRJNA983538	Wetland	39.2767	117.474
SAMN35729693	PRJNA983538	Agricultural Land	39.5469	117.032
SAMN35729694	PRJNA983538	Agricultural Land	39.6111	117.025
SAMN35729695	PRJNA983538	Agricultural Land	25.5867	100.32
SAMN35729696	PRJNA983538	Forest	25.5797	100.335
SAMN35729697	PRJNA983538	Agricultural Land	25.6867	100.388
SAMN35729698	PRJNA983538	Agricultural Land	25.6033	100.248
SAMN35729699	PRJNA983538	Agricultural Land	26.7586	100.668
SAMN35729700	PRJNA983538	Agricultural Land	26.7731	100.672
SAMN35729701	PRJNA983538	Wetland	26.8661	100.148
SAMN35729702	PRJNA983538	Forest	26.9603	100.201
SAMN35729703	PRJNA983538	Agricultural Land	29.6978	107.381
SAMN35729704	PRJNA983538	Forest	29.565	107.608
SAMN35729705	PRJNA983538	Agricultural Land	29.5125	106.472
SAMN35729706	PRJNA983538	Grassland	29.5847	107.601
SAMN35729707	PRJNA983538	Agricultural Land	25.8986	113.006
SAMN35729708	PRJNA983538	Agricultural Land	29.4706	107.144
SAMN35729709	PRJNA983538	Agricultural Land	29.4617	107.11
SAMN35729710	PRJNA983538	Grassland	28.9667	118.854
SAMN35729711	PRJNA983538	Agricultural Land	30.6686	120.518
SAMN35729712	PRJNA983538	Agricultural Land	30.6631	120.457
SAMN35729713	PRJNA983538	Grassland	33.6747	88
SAMN35729714	PRJNA983538	Grassland	25.8933	113.004
SAMN35729715	PRJNA983538	Grassland	47.3478	81.2845
SAMN35729716	PRJNA983538	Agricultural Land	25.8	113.022
SAMN35729717	PRJNA983538	Grassland	43.8631	84.0302
SAMN35729718	PRJNA983538	Grassland	43.2658	88.1502
SAMN35729719	PRJNA983538	Grassland	47.3522	87.8435
SAMN35729720	PRJNA983538	Agricultural Land	28.4984	119.904
SAMN35729721	PRJNA983538	Agricultural Land	28.4984	119.904
SAMN35729722	PRJNA983538	Agricultural Land	28.4984	119.904
SAMN35729723	PRJNA983538	Agricultural Land	28.4984	119.904
SAMN35729724	PRJNA983538	Wetland	28.4984	119.904
SAMN35729725	PRJNA983538	Agricultural Land	35.2072	114.676
SAMN35729726	PRJNA983538	Agricultural Land	29.5731	103.75
SAMN35729727	PRJNA983538	Agricultural Land	29.6604	115.952
SAMN35729728	PRJNA983538	Forest	19.1608	110.452
SAMN35729729	PRJNA983538	Agricultural Land	32.96	113.077
SAMN35729730	PRJNA983538	Agricultural Land	39.1128	117.206
SAMN35729731	PRJNA983538	Forest	39.9383	116.414
SAMN35729732	PRJNA983538	Agricultural Land	38.8753	115.494
SAMN35729733	PRJNA983538	Agricultural Land	47.3688	123.926
SAMN35729734	PRJNA983538	Wetland	39.9383	116.414
SAMN35729735	PRJNA983538	Agricultural Land	39.9297	116.402
SAMN35729736	PRJNA983538	Agricultural Land	27.7562	118.023
SAMN35729737	PRJNA983538	Grassland	37.7577	115.669
SAMN35729738	PRJNA983538	Grassland	36.2572	100.485
SAMN35729739	PRJNA983538	Agricultural Land	27.1461	110.033
SAMN35729740	PRJNA983538	Agricultural Land	36.3989	118.019
SAMN35729741	PRJNA983538	Agricultural Land	36.4461	117.969
SAMN35729742	PRJNA983538	Forest	36.4078	118.019
SAMN35729743	PRJNA983538	Agricultural Land	36.5147	117.855
SAMN35729744	PRJNA983538	Agricultural Land	32.9625	113.77
SAMN35729745	PRJNA983538	Agricultural Land	37.5817	118.044
SAMN35729746	PRJNA983538	Wetland	37.3825	117.95
SAMN35729747	PRJNA983538	Agricultural Land	37.4022	117.929
SAMN35729748	PRJNA983538	Agricultural Land	30.6542	117.413
SAMN35729749	PRJNA983538	Agricultural Land	30.6542	117.416
SAMN35729750	PRJNA983538	Agricultural Land	30.6439	117.493
SAMN35729751	PRJNA983538	Wetland	30.6439	117.493
SAMN35729752	PRJNA983538	Wetland	33.0028	112.591
SAMN35729753	PRJNA983538	Forest	30.6411	117.501
SAMN35729754	PRJNA983538	Grassland	30.6333	117.487
SAMN35729755	PRJNA983538	Agricultural Land	30.6453	117.422
SAMN35729756	PRJNA983538	Wetland	31.9008	117.243
SAMN35729757	PRJNA983538	Agricultural Land	31.6764	117.221
SAMN35729758	PRJNA983538	Forest	30.8342	117.171
SAMN35729759	PRJNA983538	Grassland	33.0028	112.591
SAMN35729760	PRJNA983538	Agricultural Land	31.25	118.32
SAMN35729761	PRJNA983538	Agricultural Land	31.2369	118.22
SAMN35729762	PRJNA983538	Agricultural Land	31.2369	118.31
SAMN35729763	PRJNA983538	Forest	31.2769	118.298
SAMN35729764	PRJNA983538	Agricultural Land	39.6314	116.585
SAMN35729765	PRJNA983538	Forest	34.4125	113.57
SAMN35729766	PRJNA983538	Agricultural Land	34.6886	113.553
SAMN35729767	PRJNA983538	Agricultural Land	27.7397	118.067
SAMN35729768	PRJNA983538	Agricultural Land	27.7608	118.031
SAMN35729409	PRJNA983538	Agricultural Land	30.18	121.35
SAMN35729410	PRJNA983538	Agricultural Land	30.18	121.35
SAMN35729411	PRJNA983538	Agricultural Land	30.18	121.35
SAMN35729412	PRJNA983538	Agricultural Land	30.18	121.35
SAMN35729413	PRJNA983538	Agricultural Land	30.18	121.35
SAMN35729414	PRJNA983538	Agricultural Land	30.18	121.35
SAMN35729415	PRJNA983538	Agricultural Land	30.18	121.35
SAMN35729416	PRJNA983538	Agricultural Land	30.18	121.35
SAMN35729417	PRJNA983538	Agricultural Land	30.18	121.35
SAMN35729418	PRJNA983538	Agricultural Land	30.18	121.35
SAMN35729419	PRJNA983538	Agricultural Land	30.18	121.35
SAMN35729420	PRJNA983538	Agricultural Land	30.18	121.35
SAMN35729421	PRJNA983538	Agricultural Land	30.18	121.35
SAMN35729422	PRJNA983538	Agricultural Land	30.18	121.35
SAMN35729423	PRJNA983538	Agricultural Land	30.18	121.35
SAMN35729424	PRJNA983538	Agricultural Land	30.18	121.35
SAMN35729425	PRJNA983538	Agricultural Land	30.18	121.35
SAMN35729426	PRJNA983538	Agricultural Land	30.18	121.35
SAMN35729427	PRJNA983538	Agricultural Land	30.18	121.35
SAMN35729428	PRJNA983538	Agricultural Land	30.18	121.35
SAMN35729429	PRJNA983538	Agricultural Land	30.18	121.35
SAMN35729464	PRJNA983538	Wetland	30.39	121.27
SAMN35729465	PRJNA983538	Wetland	30.39	121.27
SAMN35729466	PRJNA983538	Wetland	30.39	121.27
SAMN35729467	PRJNA983538	Wetland	30.39	121.27
SAMN35729468	PRJNA983538	Wetland	30.39	121.27
SAMN35729469	PRJNA983538	Bare Land	30.39	121.27
SAMN35729470	PRJNA983538	Bare Land	30.39	121.27
SAMN35729471	PRJNA983538	Bare Land	30.39	121.27
SAMN35729472	PRJNA983538	Bare Land	30.39	121.27
SAMN35729473	PRJNA983538	Bare Land	30.39	121.27
SAMN35729474	PRJNA983538	Bare Land	30.39	121.27
SAMN35729475	PRJNA983538	Bare Land	30.39	121.27
SAMN35729476	PRJNA983538	Bare Land	30.39	121.27
SAMN35729477	PRJNA983538	Bare Land	30.39	121.27
SAMN35729478	PRJNA983538	Wetland	30.39	121.27
SAMN35729479	PRJNA983538	Wetland	30.39	121.27
SAMN35729480	PRJNA983538	Wetland	30.39	121.27
SAMN35729481	PRJNA983538	Wetland	30.39	121.27
SAMN35729482	PRJNA983538	Wetland	30.39	121.27
SAMN35729430	PRJNA983538	Agricultural Land	53.47	-2.23
SAMN35729431	PRJNA983538	Agricultural Land	53.47	-2.24
SAMN35729432	PRJNA983538	Agricultural Land	53.47	-2.23
SAMN35729433	PRJNA983538	Agricultural Land	53.47	-2.23
SAMN35729434	PRJNA983538	Agricultural Land	53.47	-2.23
SAMN35729435	PRJNA983538	Agricultural Land	53.47	-2.24
SAMD00093652	PRJDB6359	Agricultural Land	32.4798	119.136
SAMD00093653	PRJDB6359	Agricultural Land	32.4798	119.136
SAMD00093654	PRJDB6359	Agricultural Land	32.4798	119.136
SAMD00093655	PRJDB6359	Agricultural Land	32.4798	119.136
SAMD00093656	PRJDB6359	Agricultural Land	32.4798	119.136
SAMD00093657	PRJDB6359	Agricultural Land	32.4798	119.136
SAMD00093659	PRJDB6359	Agricultural Land	32.4798	119.136
SAMD00093660	PRJDB6359	Agricultural Land	32.4798	119.136
SAMD00093661	PRJDB6359	Agricultural Land	32.4798	119.136
SAMD00093662	PRJDB6359	Agricultural Land	32.4798	119.136
SAMD00152194	PRJDB7705	Agricultural Land	32.889	130.766
SAMD00152195	PRJDB7705	Agricultural Land	32.889	130.766
SAMD00152196	PRJDB7705	Agricultural Land	32.889	130.766
SAMD00152197	PRJDB7705	Agricultural Land	32.889	130.766
SAMD00152198	PRJDB7705	Agricultural Land	32.889	130.766
SAMD00152199	PRJDB7705	Agricultural Land	32.889	130.766
SAMD00152200	PRJDB7705	Agricultural Land	35.735	139.539
SAMD00152201	PRJDB7705	Agricultural Land	35.735	139.539
SAMD00152202	PRJDB7705	Agricultural Land	35.735	139.539
SAMD00152203	PRJDB7705	Agricultural Land	35.735	139.539
SAMD00152204	PRJDB7705	Agricultural Land	35.735	139.539
SAMD00152205	PRJDB7705	Agricultural Land	35.735	139.539
SAMD00152206	PRJDB7705	Agricultural Land	38.249	140.244
SAMD00152207	PRJDB7705	Agricultural Land	38.249	140.244
SAMD00152208	PRJDB7705	Agricultural Land	38.249	140.244
SAMD00152209	PRJDB7705	Agricultural Land	38.249	140.244
SAMD00152210	PRJDB7705	Agricultural Land	38.249	140.244
SAMD00152211	PRJDB7705	Agricultural Land	38.249	140.244
SAMN35729436	PRJNA983538	Agricultural Land	55.94	-3.22
SAMN35729437	PRJNA983538	Agricultural Land	55.94	-3.22
SAMN35729438	PRJNA983538	Agricultural Land	55.94	-3.22
SAMEA3539316	PRJEB10725	Grassland	34.9817	-97.5206
SAMEA7379553	PRJEB37811	Bare Land	-3.076	37.353
SAMEA7379554	PRJEB37811	Bare Land	-3.076	37.353
SAMEA7379555	PRJEB37811	Bare Land	-3.076	37.353
SAMEA7379556	PRJEB37811	Bare Land	-3.076	37.353
SAMEA7379557	PRJEB37811	Bare Land	-3.076	37.353
SAMEA7379558	PRJEB37811	Bare Land	-3.076	37.353
SAMEA7379559	PRJEB37811	Bare Land	-3.076	37.353
SAMEA7379560	PRJEB37811	Bare Land	-3.076	37.353
SAMEA7379561	PRJEB37811	Bare Land	-3.076	37.353
SAMEA7379562	PRJEB37811	Bare Land	-3.076	37.353
SAMEA7379563	PRJEB37811	Bare Land	-3.076	37.353
SAMEA7379564	PRJEB37811	Bare Land	-3.076	37.353
SAMEA7379565	PRJEB37811	Bare Land	-3.076	37.353
SAMEA7379566	PRJEB37811	Bare Land	-3.076	37.353
SAMEA7379567	PRJEB37811	Bare Land	-3.076	37.353
SAMEA7379568	PRJEB37811	Bare Land	-3.076	37.353
SAMEA7379569	PRJEB37811	Bare Land	-3.076	37.353
SAMEA7379570	PRJEB37811	Bare Land	-3.076	37.353
SAMEA7379571	PRJEB37811	Bare Land	-3.076	37.353
SAMEA7379572	PRJEB37811	Bare Land	-3.076	37.353
SAMN35729439	PRJNA983538	Forest	52.46	13.27
SAMN35729440	PRJNA983538	Wetland	52.47	13.26
SAMN35729441	PRJNA983538	Forest	52.46	13.3
SAMN35729442	PRJNA983538	Forest	51.73	122.02
SAMN35729443	PRJNA983538	Forest	49.54	123.2
SAMN35729444	PRJNA983538	Forest	49.54	123.2
SAMN35729445	PRJNA983538	Forest	51.73	122.02
SAMN35729446	PRJNA983538	Forest	51.73	122.02
SAMN35729447	PRJNA983538	Forest	51.73	122.02
SAMN35729448	PRJNA983538	Forest	51.73	122.02
SAMN35729449	PRJNA983538	Forest	51.73	122.02
SAMN35729450	PRJNA983538	Forest	49.54	123.2
SAMN35729451	PRJNA983538	Forest	49.54	123.2
SAMN35729452	PRJNA983538	Forest	49.54	123.2
SAMN35729453	PRJNA983538	Forest	51.725	122.02
SAMN35729454	PRJNA983538	Forest	51.725	122.02
SAMN35729455	PRJNA983538	Forest	51.725	122.02
SAMN35729456	PRJNA983538	Forest	51.725	122.02
SAMN35729457	PRJNA983538	Forest	51.725	122.02
SAMN35729458	PRJNA983538	Forest	49.5379	123.205
SAMN35729459	PRJNA983538	Forest	49.5379	123.205
SAMN35729460	PRJNA983538	Forest	49.5379	123.205
SAMN35729461	PRJNA983538	Forest	49.5379	123.205
SAMN35729462	PRJNA983538	Forest	49.5379	123.205
SAMN35729463	PRJNA983538	Forest	49.5379	123.205
SAMN35729510	PRJNA983538	Agricultural Land	29.16	119.39
SAMN35729511	PRJNA983538	Agricultural Land	29.16	119.39
SAMN35729512	PRJNA983538	Agricultural Land	29.16	119.39
SAMN35729513	PRJNA983538	Agricultural Land	29.16	119.39
SAMN35729514	PRJNA983538	Agricultural Land	29.16	119.39
SAMN35729515	PRJNA983538	Agricultural Land	29.16	119.39
SAMN35729516	PRJNA983538	Agricultural Land	29.16	119.39
SAMN35729517	PRJNA983538	Agricultural Land	29.16	119.39
SAMN35729518	PRJNA983538	Agricultural Land	29.16	119.39
SAMN35729519	PRJNA983538	Agricultural Land	29.16	119.39
SAMN35729520	PRJNA983538	Agricultural Land	29.16	119.39
SAMN35729521	PRJNA983538	Agricultural Land	29.16	119.39
SAMN35729522	PRJNA983538	Agricultural Land	29.16	119.39
SAMN35729523	PRJNA983538	Agricultural Land	29.16	119.39
SAMN35729524	PRJNA983538	Agricultural Land	29.16	119.39
SAMN35729525	PRJNA983538	Agricultural Land	29.16	119.39
SAMN35729526	PRJNA983538	Agricultural Land	29.16	119.39
SAMN35729527	PRJNA983538	Agricultural Land	29.16	119.39
SAMN35729528	PRJNA983538	Agricultural Land	29.16	119.39
SAMN35729529	PRJNA983538	Agricultural Land	29.16	119.39
SAMN35729530	PRJNA983538	Agricultural Land	29.16	119.39
SAMN35729531	PRJNA983538	Agricultural Land	29.16	119.39
SAMN35729532	PRJNA983538	Agricultural Land	29.16	119.39
SAMN35729533	PRJNA983538	Agricultural Land	29.16	119.39
SAMN35729534	PRJNA983538	Agricultural Land	29.16	119.39
SAMN35729535	PRJNA983538	Agricultural Land	29.16	119.39
SAMN35729536	PRJNA983538	Agricultural Land	29.16	119.39
SAMN35729537	PRJNA983538	Agricultural Land	29.16	119.39
SAMN35729538	PRJNA983538	Agricultural Land	29.16	119.39
SAMN35729539	PRJNA983538	Agricultural Land	29.16	119.39
SAMN35729540	PRJNA983538	Agricultural Land	29.16	119.39
SAMN35729541	PRJNA983538	Agricultural Land	29.16	119.39
SAMN35729542	PRJNA983538	Agricultural Land	29.16	119.39
SAMN35729543	PRJNA983538	Agricultural Land	29.16	119.39
SAMN35729544	PRJNA983538	Agricultural Land	29.16	119.39
SAMN35729545	PRJNA983538	Agricultural Land	29.16	119.39
SAMN35729546	PRJNA983538	Agricultural Land	29.16	119.39
SAMN35729547	PRJNA983538	Agricultural Land	29.16	119.39
SAMN35729548	PRJNA983538	Agricultural Land	29.16	119.39
SAMN35729549	PRJNA983538	Agricultural Land	29.16	119.39
SAMN35729550	PRJNA983538	Agricultural Land	29.16	119.39
SAMN35729551	PRJNA983538	Agricultural Land	29.16	119.39
SAMN35729552	PRJNA983538	Agricultural Land	29.16	119.39
SAMN35729553	PRJNA983538	Agricultural Land	29.16	119.39
SAMN35729554	PRJNA983538	Agricultural Land	29.16	119.39
SAMN35729555	PRJNA983538	Agricultural Land	29.16	119.39
SAMN35729556	PRJNA983538	Agricultural Land	29.16	119.39
SAMN35729557	PRJNA983538	Agricultural Land	29.16	119.39
SAMN35729558	PRJNA983538	Agricultural Land	29.16	119.39
SAMN35729559	PRJNA983538	Agricultural Land	29.16	119.39
SAMN35729483	PRJNA983538	Bare Land	30.47	122.3
SAMN35729484	PRJNA983538	Bare Land	30.47	122.3
SAMN35729485	PRJNA983538	Wetland	30.47	122.3
SAMN35729486	PRJNA983538	Wetland	30.47	122.3
SAMN35729487	PRJNA983538	Bare Land	30.47	122.3
SAMN35729488	PRJNA983538	Wetland	30.47	122.3
SAMN35729489	PRJNA983538	Wetland	30.47	122.3
SAMN35729490	PRJNA983538	Wetland	30.47	122.3
SAMN35729491	PRJNA983538	Wetland	30.47	122.3
SAMN35729492	PRJNA983538	Wetland	30.47	122.3
SAMN12608666	PRJNA554847	Forest	64.85	-147.84
SAMN12608684	PRJNA554847	Forest	39.99	-105.37
SAMN12608681	PRJNA554847	Grassland	39.09	-96.57
SAMN12608680	PRJNA554847	Grassland	39.09	-96.57
SAMN12608679	PRJNA554847	Wetland	42.4	-85.4
SAMN12608677	PRJNA554847	Forest	42.53	-72.19
SAMN12608676	PRJNA554847	Forest	42.53	-72.19
SAMN12608674	PRJNA554847	Forest	43.94	-71.75
SAMN12640564	PRJNA562410	Forest	-2.07142	102.792
SAMN12640563	PRJNA562410	Forest	-2.07562	102.792
SAMN12640562	PRJNA562410	Forest	-2.14044	102.851
SAMN12640561	PRJNA562410	Forest	-2.01579	102.753
SAMN12640560	PRJNA562410	Forest	-2.06354	102.801
SAMN12640559	PRJNA562410	Forest	-2.03027	102.771
SAMN12640586	PRJNA562410	Forest	-1.80506	103.264
SAMN12640585	PRJNA562410	Forest	-1.85967	103.301
SAMN12640558	PRJNA562410	Forest	-1.94188	102.581
SAMN12640584	PRJNA562410	Forest	-1.87903	103.275
SAMN12640583	PRJNA562410	Forest	-1.91097	103.267
SAMN12640582	PRJNA562410	Forest	-1.78686	103.271
SAMN12640581	PRJNA562410	Forest	-1.85789	103.308
SAMN12640580	PRJNA562410	Forest	-1.88353	103.268
SAMN12640579	PRJNA562410	Forest	-1.90989	103.266
SAMN12640578	PRJNA562410	Forest	-1.78536	103.277
SAMN12640577	PRJNA562410	Forest	-1.84914	103.3
SAMN12640576	PRJNA562410	Forest	-1.82553	103.294
SAMN12640575	PRJNA562410	Forest	-1.92778	103.259
SAMN12640557	PRJNA562410	Forest	-1.94329	102.581
SAMN12640574	PRJNA562410	Forest	-2.18756	103.343
SAMN12640573	PRJNA562410	Forest	-2.17503	103.333
SAMN12640572	PRJNA562410	Forest	-2.15817	103.334
SAMN12640571	PRJNA562410	Forest	-2.15275	103.35
SAMN12640570	PRJNA562410	Forest	-2.07726	102.773
SAMN12640569	PRJNA562410	Forest	-2.09601	102.783
SAMN12640568	PRJNA562410	Forest	-2.08534	102.79
SAMN12640567	PRJNA562410	Forest	-2.09241	102.803
SAMN12640565	PRJNA562410	Forest	-2.05046	102.753
SAMN12640556	PRJNA562410	Forest	-1.98197	102.751
SAMN12640555	PRJNA562410	Forest	-1.99514	102.752
SAMN12740641	PRJNA465697	Agricultural Land	20.686	-101.875
SAMN12740640	PRJNA465696	Agricultural Land	21.053	-103.902
SAMN12740642	PRJNA404245	Agricultural Land	21.195	-100.439
SAMN12740643	PRJNA404246	Agricultural Land	21.766	-100.163
SAMN12633281	PRJNA562057	Agricultural Land	28.21	116.93
SAMN12633280	PRJNA562057	Agricultural Land	28.21	116.93
SAMN12633279	PRJNA562057	Agricultural Land	28.21	116.93
SAMN12633278	PRJNA562057	Agricultural Land	28.21	116.93
SAMN12633277	PRJNA562057	Agricultural Land	28.21	116.93
SAMN12633276	PRJNA562057	Agricultural Land	28.21	116.93
SAMN12633275	PRJNA562057	Agricultural Land	28.21	116.93
SAMN12633274	PRJNA562057	Agricultural Land	28.21	116.93
SAMN12633273	PRJNA562057	Agricultural Land	28.21	116.93
SAMN13016621	PRJNA576996	Wetland	30.0756	114.863
SAMN13016620	PRJNA576996	Agricultural Land	30.9792	113.864
SAMN13016619	PRJNA576996	Wetland	45.3644	132.319
SAMN13016618	PRJNA576996	Grassland	48.3	134.7
SAMN13016625	PRJNA576996	Forest	23.9439	101.5
SAMN13016624	PRJNA576996	Forest	22.9936	102.464
SAMN13016623	PRJNA576996	Wetland	31.7272	121.233
SAMN13016622	PRJNA576996	Wetland	30.8967	120.743
SAMN02401118	PRJNA227301	Wetland	30.7792	120.708
SAMN13153333	PRJNA577476	Grassland	39.7393	-123.631
SAMN13153332	PRJNA577476	Grassland	39.7393	-123.631
SAMN13153331	PRJNA577476	Grassland	39.7393	-123.631
SAMN13153383	PRJNA577476	Forest	39.5673	-123.476
SAMN13153382	PRJNA577476	Forest	39.5673	-123.476
SAMN13153381	PRJNA577476	Forest	39.5673	-123.476
SAMN13153380	PRJNA577476	Forest	39.5673	-123.476
SAMN13153379	PRJNA577476	Forest	39.5673	-123.476
SAMN13153378	PRJNA577476	Forest	39.5673	-123.476
SAMN13153377	PRJNA577476	Forest	39.5673	-123.476
SAMN13153330	PRJNA577476	Grassland	39.7393	-123.631
SAMN13153374	PRJNA577476	Forest	39.5673	-123.476
SAMN13153373	PRJNA577476	Forest	39.5673	-123.476
SAMN13153372	PRJNA577476	Forest	39.5673	-123.476
SAMN13153371	PRJNA577476	Grassland	39.5673	-123.476
SAMN13153370	PRJNA577476	Grassland	39.5673	-123.476
SAMN13153369	PRJNA577476	Grassland	39.5673	-123.476
SAMN13153368	PRJNA577476	Grassland	39.5673	-123.476
SAMN13153367	PRJNA577476	Grassland	39.5673	-123.476
SAMN13153366	PRJNA577476	Grassland	39.5673	-123.476
SAMN13153365	PRJNA577476	Grassland	39.5673	-123.476
SAMN13153329	PRJNA577476	Grassland	39.7393	-123.631
SAMN13153364	PRJNA577476	Grassland	39.5673	-123.476
SAMN13153363	PRJNA577476	Grassland	39.5673	-123.476
SAMN13153362	PRJNA577476	Grassland	39.5673	-123.476
SAMN13153361	PRJNA577476	Grassland	39.5673	-123.476
SAMN13153360	PRJNA577476	Grassland	39.5673	-123.476
SAMN13153358	PRJNA577476	Forest	39.7279	-123.644
SAMN13153357	PRJNA577476	Forest	39.7279	-123.644
SAMN13153356	PRJNA577476	Forest	39.7279	-123.644
SAMN13153355	PRJNA577476	Forest	39.7279	-123.644
SAMN13153328	PRJNA577476	Grassland	39.7393	-123.631
SAMN13153354	PRJNA577476	Forest	39.7279	-123.644
SAMN13153353	PRJNA577476	Forest	39.7292	-123.642
SAMN13153352	PRJNA577476	Forest	39.7292	-123.642
SAMN13153351	PRJNA577476	Forest	39.7292	-123.642
SAMN13153350	PRJNA577476	Forest	39.7292	-123.642
SAMN13153349	PRJNA577476	Forest	39.7292	-123.642
SAMN13153348	PRJNA577476	Forest	39.7292	-123.642
SAMN13153347	PRJNA577476	Forest	39.7292	-123.642
SAMN13153346	PRJNA577476	Forest	39.7292	-123.642
SAMN13153345	PRJNA577476	Forest	39.7292	-123.642
SAMN13153327	PRJNA577476	Grassland	39.7393	-123.631
SAMN13153344	PRJNA577476	Forest	39.7292	-123.642
SAMN13153343	PRJNA577476	Forest	39.7292	-123.642
SAMN13153342	PRJNA577476	Forest	39.7292	-123.642
SAMN13153339	PRJNA577476	Forest	39.7292	-123.642
SAMN13153338	PRJNA577476	Forest	39.7292	-123.642
SAMN12812037	PRJNA572113	Agricultural Land	42.99	-123.63
SAMN12811695	PRJNA572115	Agricultural Land	42.99	-123.63
SAMN13007835	PRJNA588030	Grassland	48.4514	9.49105
SAMN13262227	PRJNA588894	Agricultural Land	25.263	104.16
SAMN06264949	PRJNA365685	Grassland	39.7392	-123.631
SAMN13241871	PRJNA588342	Tundra	68.6125	161.35
SAMN13241871	PRJNA588342	Tundra	68.6125	161.35
SAMN13241871	PRJNA588342	Tundra	68.6125	161.35
SAMN13241871	PRJNA588342	Tundra	68.6125	161.35
SAMN13241871	PRJNA588342	Tundra	68.6125	161.35
SAMN13241871	PRJNA588342	Tundra	68.6125	161.35
SAMN13241871	PRJNA588342	Tundra	68.6125	161.35
SAMN13241871	PRJNA588342	Tundra	68.6125	161.35
SAMN13241871	PRJNA588342	Tundra	68.6125	161.35
SAMN13241871	PRJNA588342	Tundra	68.6125	161.35
SAMN13241871	PRJNA588342	Tundra	68.6125	161.35
SAMN13241871	PRJNA588342	Tundra	68.6125	161.35
SAMN13241871	PRJNA588342	Tundra	68.6125	161.35
SAMN13241871	PRJNA588342	Tundra	68.6125	161.35
SAMN13241871	PRJNA588342	Tundra	68.6125	161.35
SAMN13241871	PRJNA588342	Tundra	68.6125	161.35
SAMN13241871	PRJNA588342	Tundra	68.6125	161.35
SAMN13241871	PRJNA588342	Tundra	68.6125	161.35
SAMN13241871	PRJNA588342	Tundra	68.6125	161.35
SAMN13241871	PRJNA588342	Tundra	68.6125	161.35
SAMN13241871	PRJNA588342	Tundra	68.6125	161.35
SAMN13241871	PRJNA588342	Tundra	68.6125	161.35
SAMN13241871	PRJNA588342	Tundra	68.6125	161.35
SAMN13241871	PRJNA588342	Tundra	68.6125	161.35
SAMN13241871	PRJNA588342	Tundra	68.6125	161.35
SAMN13241871	PRJNA588342	Tundra	68.6125	161.35
SAMN13241871	PRJNA588342	Tundra	68.6125	161.35
SAMN13241871	PRJNA588342	Tundra	68.6125	161.35
SAMN13281620	PRJNA589661	Wetland	36.78	100
SAMN13326189	PRJNA578507	Artificial Surfaces	23.16	113.23
SAMN06265749	PRJNA364550	Forest	39.7291	-123.642
SAMN13481444	PRJNA593573	Agricultural Land	1.42	103.7
SAMN13481443	PRJNA593573	Agricultural Land	1.42	103.7
SAMN13481442	PRJNA593573	Agricultural Land	1.42	103.7
SAMN13481441	PRJNA593573	Agricultural Land	1.42	103.7
SAMN13481428	PRJNA593573	Agricultural Land	1.42	103.7
SAMN13481427	PRJNA593573	Agricultural Land	1.42	103.7
SAMN13481426	PRJNA593573	Agricultural Land	1.42	103.7
SAMN13481425	PRJNA593573	Agricultural Land	1.42	103.7
SAMN13481412	PRJNA593573	Agricultural Land	1.42	103.7
SAMN13481411	PRJNA593573	Agricultural Land	1.42	103.7
SAMN13481410	PRJNA593573	Agricultural Land	1.42	103.7
SAMN13481409	PRJNA593573	Agricultural Land	1.42	103.7
SAMN13481402	PRJNA593573	Agricultural Land	1.42	103.7
SAMN13481401	PRJNA593573	Agricultural Land	1.42	103.7
SAMN13481400	PRJNA593573	Agricultural Land	1.42	103.7
SAMN13481387	PRJNA593573	Agricultural Land	1.42	103.7
SAMN13481385	PRJNA593573	Agricultural Land	1.42	103.7
SAMN13481384	PRJNA593573	Agricultural Land	1.42	103.7
SAMN13481371	PRJNA593573	Agricultural Land	1.42	103.7
SAMN13481370	PRJNA593573	Agricultural Land	1.42	103.7
SAMN13481369	PRJNA593573	Agricultural Land	1.42	103.7
SAMN13482106	PRJNA593573	Agricultural Land	1.42	103.7
SAMN13482105	PRJNA593573	Agricultural Land	1.42	103.7
SAMN13482104	PRJNA593573	Agricultural Land	1.42	103.7
SAMN13482103	PRJNA593573	Agricultural Land	1.42	103.7
SAMN13482102	PRJNA593573	Agricultural Land	1.42	103.7
SAMN13482101	PRJNA593573	Agricultural Land	1.42	103.7
SAMN13482100	PRJNA593573	Agricultural Land	1.42	103.7
SAMN13482114	PRJNA593573	Agricultural Land	1.42	103.7
SAMN13482113	PRJNA593573	Agricultural Land	1.42	103.7
SAMN13482112	PRJNA593573	Agricultural Land	1.42	103.7
SAMN13482108	PRJNA593573	Agricultural Land	1.42	103.7
SAMN13482107	PRJNA593573	Agricultural Land	1.42	103.7
SAMN13567777	PRJNA595820	Agricultural Land	23.5823	104.33
SAMN13567776	PRJNA595820	Agricultural Land	23.2415	104.084
SAMN13567775	PRJNA595820	Agricultural Land	23.2415	104.084
SAMN13567774	PRJNA595820	Agricultural Land	23.2415	104.084
SAMN13567773	PRJNA595820	Agricultural Land	23.2097	104.134
SAMN13567772	PRJNA595820	Agricultural Land	23.2097	104.134
SAMN13567771	PRJNA595820	Agricultural Land	23.2097	104.134
SAMN13567770	PRJNA595820	Agricultural Land	23.3167	104.203
SAMN13567782	PRJNA595820	Agricultural Land	23.8297	104.104
SAMN13567781	PRJNA595820	Agricultural Land	23.8297	104.104
SAMN13567779	PRJNA595820	Agricultural Land	23.5823	104.33
SAMN13567778	PRJNA595820	Agricultural Land	23.5823	104.33
SAMN13567769	PRJNA595820	Agricultural Land	23.3167	104.203
SAMN13567768	PRJNA595820	Agricultural Land	23.3167	104.203
SAMN13423131	PRJNA592367	Bare Land	-23.14	16.08
SAMN13423130	PRJNA592367	Bare Land	-23.2	15.55
SAMN13812698	PRJNA600336	Artificial Surfaces	30.83	120.72
SAMN12794644	PRJNA567663	Bare Land	34.7856	-115.66
SAMN12796084	PRJNA567664	Bare Land	34.7856	-115.66
SAMN12795546	PRJNA567666	Bare Land	34.7856	-115.66
SAMN12795550	PRJNA567665	Bare Land	34.7856	-115.66
SAMN12795838	PRJNA567668	Bare Land	34.3778	-117.61
SAMN12796233	PRJNA567667	Bare Land	34.7856	-115.66
SAMN12796024	PRJNA567750	Bare Land	34.7856	-115.66
SAMN12796116	PRJNA567752	Bare Land	34.7856	-115.66
SAMN12796104	PRJNA567749	Bare Land	34.7856	-115.66
SAMN12794622	PRJNA567751	Bare Land	34.3778	-117.61
SAMN12795548	PRJNA567822	Bare Land	34.7856	-115.66
SAMN12795905	PRJNA567821	Bare Land	34.7856	-115.66
SAMN12794941	PRJNA567824	Bare Land	34.3778	-117.61
SAMN12796111	PRJNA567825	Bare Land	34.3778	-117.61
SAMN12795929	PRJNA567826	Bare Land	34.3778	-117.61
SAMN12795560	PRJNA567828	Bare Land	34.3778	-117.61
SAMN12794860	PRJNA567827	Bare Land	34.3778	-117.61
SAMN12794643	PRJNA567832	Bare Land	34.7856	-115.66
SAMN12795547	PRJNA567838	Bare Land	34.7856	-115.66
SAMN12796235	PRJNA567836	Bare Land	34.7856	-115.66
SAMN12795545	PRJNA567839	Bare Land	34.7856	-115.66
SAMN12795168	PRJNA567829	Bare Land	34.3778	-117.61
SAMN12796230	PRJNA567840	Bare Land	34.3778	-117.61
SAMN12794623	PRJNA567841	Bare Land	34.3778	-117.61
SAMN12794830	PRJNA567835	Bare Land	34.3778	-117.61
SAMN12794831	PRJNA567837	Bare Land	34.7856	-115.66
SAMN12794829	PRJNA567833	Bare Land	34.3778	-117.61
SAMN12795169	PRJNA567830	Bare Land	34.7856	-115.66
SAMN12794948	PRJNA567831	Bare Land	34.7856	-115.66
SAMN12795170	PRJNA567658	Bare Land	34.7856	-115.66
SAMN12794642	PRJNA567844	Bare Land	34.3778	-117.61
SAMN12794918	PRJNA567656	Bare Land	34.3778	-117.61
SAMN12796109	PRJNA567657	Bare Land	34.7856	-115.66
SAMN12795199	PRJNA567843	Bare Land	34.3778	-117.61
SAMN12796212	PRJNA567845	Bare Land	34.3778	-117.61
SAMN12794859	PRJNA567842	Bare Land	34.3778	-117.61
SAMN12796115	PRJNA567659	Bare Land	34.7856	-115.66
SAMN12796121	PRJNA567660	Bare Land	34.3778	-117.61
SAMN12795924	PRJNA567661	Bare Land	34.3778	-117.61
SAMN13925158	PRJNA603240	Forest	48.667	14.7048
SAMN13925157	PRJNA603240	Forest	48.6653	14.7088
SAMN13925156	PRJNA603240	Forest	48.666	14.7066
SAMN13925154	PRJNA603240	Forest	48.6664	14.7099
SAMN13925153	PRJNA603240	Forest	48.6642	14.7058
SAMN13925152	PRJNA603240	Forest	48.6645	14.7093
SAMN13925173	PRJNA603240	Forest	48.6671	14.7053
SAMN13925171	PRJNA603240	Forest	48.6673	14.7044
SAMN13925168	PRJNA603240	Forest	48.6636	14.7074
SAMN13925167	PRJNA603240	Forest	48.6649	14.709
SAMN13925163	PRJNA603240	Forest	48.6647	14.7087
SAMN13925162	PRJNA603240	Forest	48.6643	14.7045
SAMN13925161	PRJNA603240	Forest	48.666	14.7092
SAMN13925160	PRJNA603240	Forest	48.6655	14.7069
SAMN13925159	PRJNA603240	Forest	48.6669	14.7035
SAMN13925150	PRJNA603240	Forest	48.6661	14.7076
SAMN13925149	PRJNA603240	Forest	48.6667	14.7043
SAMN12793969	PRJNA566978	Forest	38.7864	-120.429
SAMN12794413	PRJNA566979	Forest	38.7966	-120.383
SAMN12794183	PRJNA566980	Forest	38.7856	-120.428
SAMN12793980	PRJNA566981	Forest	38.7833	-120.299
SAMN12794412	PRJNA566982	Forest	38.7833	-120.298
SAMN12794334	PRJNA566983	Forest	38.9738	-120.493
SAMN14071567	PRJNA605576	Artificial Surfaces	28.68	121.43
SAMN14071566	PRJNA605576	Artificial Surfaces	28.68	121.43
SAMN14071565	PRJNA605576	Artificial Surfaces	28.68	121.43
SAMN14071564	PRJNA605576	Artificial Surfaces	28.68	121.43
SAMN14071563	PRJNA605576	Artificial Surfaces	28.68	121.43
SAMN14071562	PRJNA605576	Artificial Surfaces	28.68	121.43
SAMN14071592	PRJNA605576	Artificial Surfaces	28.68	121.43
SAMN14071591	PRJNA605576	Artificial Surfaces	28.68	121.43
SAMN14071590	PRJNA605576	Artificial Surfaces	28.68	121.43
SAMN14071589	PRJNA605576	Artificial Surfaces	28.68	121.43
SAMN14071588	PRJNA605576	Artificial Surfaces	28.68	121.43
SAMN14071561	PRJNA605576	Artificial Surfaces	28.68	121.43
SAMN14071587	PRJNA605576	Artificial Surfaces	28.68	121.43
SAMN14071586	PRJNA605576	Artificial Surfaces	28.68	121.43
SAMN14071585	PRJNA605576	Artificial Surfaces	28.68	121.43
SAMN14071584	PRJNA605576	Artificial Surfaces	28.68	121.43
SAMN14071583	PRJNA605576	Artificial Surfaces	28.68	121.43
SAMN14071582	PRJNA605576	Artificial Surfaces	28.68	121.43
SAMN14071581	PRJNA605576	Artificial Surfaces	28.68	121.43
SAMN14071580	PRJNA605576	Artificial Surfaces	28.68	121.43
SAMN14071579	PRJNA605576	Artificial Surfaces	28.68	121.43
SAMN14071578	PRJNA605576	Artificial Surfaces	28.68	121.43
SAMN14071560	PRJNA605576	Artificial Surfaces	28.68	121.43
SAMN14071577	PRJNA605576	Artificial Surfaces	28.68	121.43
SAMN14071576	PRJNA605576	Artificial Surfaces	28.68	121.43
SAMN14071575	PRJNA605576	Artificial Surfaces	28.68	121.43
SAMN14071574	PRJNA605576	Artificial Surfaces	28.68	121.43
SAMN14071573	PRJNA605576	Artificial Surfaces	28.68	121.43
SAMN14071572	PRJNA605576	Artificial Surfaces	28.68	121.43
SAMN14071571	PRJNA605576	Artificial Surfaces	28.68	121.43
SAMN14071570	PRJNA605576	Artificial Surfaces	28.68	121.43
SAMN14071569	PRJNA605576	Artificial Surfaces	28.68	121.43
SAMN14071568	PRJNA605576	Artificial Surfaces	28.68	121.43
SAMN14071559	PRJNA605576	Artificial Surfaces	28.68	121.43
SAMN14071558	PRJNA605576	Artificial Surfaces	28.68	121.43
SAMN14082485	PRJNA605948	Forest	48.4168	9.35832
SAMN13942205	PRJNA603603	Artificial Surfaces	21.179	-104.54
SAMN13942202	PRJNA603603	Artificial Surfaces	24.0062	-104.385
SAMN13942199	PRJNA603603	Artificial Surfaces	21.8275	-102.121
SAMN13942210	PRJNA603603	Artificial Surfaces	23.2927	-106.479
SAMN13942207	PRJNA603603	Artificial Surfaces	21.8363	-105.083
SAMN13908148	PRJNA602600	Bare Land	-38.83	-71.65
SAMN13908146	PRJNA602600	Bare Land	-38.83	-71.65
SAMN13908144	PRJNA602600	Bare Land	-38.57	-71.78
SAMN13908142	PRJNA602600	Bare Land	-38.57	-71.78
SAMN13908156	PRJNA602600	Bare Land	-38.82	-71.68
SAMN13908154	PRJNA602600	Bare Land	-38.82	-71.68
SAMN13908152	PRJNA602600	Bare Land	-38.82	-71.68
SAMN13908150	PRJNA602600	Bare Land	-38.83	-71.65
SAMN13908140	PRJNA602600	Bare Land	-38.57	-71.78
SAMN14331837	PRJNA611469	Artificial Surfaces	29.3852	111.024
SAMN14483312	PRJNA616167	Agricultural Land	34.57	116.42
SAMN14483311	PRJNA616167	Agricultural Land	34.55	116.31
SAMN14483310	PRJNA616167	Agricultural Land	34.45	116.29
SAMN14483309	PRJNA616167	Agricultural Land	34.35	116.19
SAMN14483308	PRJNA616167	Agricultural Land	35.44	115.88
SAMN14483307	PRJNA616167	Agricultural Land	35.34	115.78
SAMN14483306	PRJNA616167	Agricultural Land	35.24	115.68
SAMN14483305	PRJNA616167	Agricultural Land	35.14	115.54
SAMN14483314	PRJNA616167	Agricultural Land	34.75	116.64
SAMN14483313	PRJNA616167	Agricultural Land	34.65	116.53
SAMN14483304	PRJNA616167	Agricultural Land	33.02	113.93
SAMN14483303	PRJNA616167	Agricultural Land	35.07	115.52
SAMN02614524	PRJNA236429	Agricultural Land	40.296	-89.944
SAMN02614525	PRJNA236429	Agricultural Land	40.075	-88.242
SAMN02364459	PRJNA221719	Grassland	47.51	-93.45
SAMN02364459	PRJNA221719	Grassland	47.51	-93.45
SAMN02364459	PRJNA221719	Grassland	47.51	-93.45
SAMN02364454	PRJNA221719	Forest	47.5062	-93.4543
SAMN02364455	PRJNA221719	Grassland	47.51	-93.45
SAMN02364456	PRJNA221719	Forest	47.505	-93.489
SAMN02364457	PRJNA221719	Forest	47.505	-93.489
SAMN14510906	PRJNA620814	Agricultural Land	26.6539	-80.6288
SAMN14510857	PRJNA620815	Agricultural Land	26.6539	-80.6288
SAMN14510725	PRJNA620817	Agricultural Land	26.6539	-80.6288
SAMN14510770	PRJNA620818	Agricultural Land	26.6591	-80.6279
SAMN14510759	PRJNA620819	Agricultural Land	26.6591	-80.6279
SAMN14510966	PRJNA620820	Agricultural Land	26.6591	-80.6279
SAMN14510723	PRJNA620825	Agricultural Land	26.6539	-80.6288
SAMN14510928	PRJNA620827	Agricultural Land	26.6591	-80.6279
SAMN14510983	PRJNA620681	Agricultural Land	26.6591	-80.6279
SAMN14510892	PRJNA620684	Agricultural Land	26.6541	-80.6298
SAMN14510858	PRJNA620682	Agricultural Land	26.6541	-80.6298
SAMN14510893	PRJNA620683	Agricultural Land	26.6541	-80.6298
SAMN14515371	PRJNA621624	Bare Land	34.7856	-115.66
SAMN14515673	PRJNA621626	Bare Land	34.3778	-117.61
SAMN14515585	PRJNA621625	Bare Land	34.7856	-115.66
SAMN02630628	PRJNA237577	Shrubland	38.7	117.5
SAMN14514950	PRJNA621418	Agricultural Land	57.1866	-2.2146
SAMN14514931	PRJNA621421	Agricultural Land	57.1866	-2.2146
SAMN14514969	PRJNA621422	Agricultural Land	57.1866	-2.2146
SAMN14514815	PRJNA621423	Agricultural Land	57.1866	-2.2146
SAMN14514827	PRJNA621424	Agricultural Land	57.1863	-2.2145
SAMN14515461	PRJNA621419	Agricultural Land	57.1866	-2.2146
SAMN14515358	PRJNA621425	Agricultural Land	57.1863	-2.2145
SAMN14515665	PRJNA621432	Agricultural Land	57.1866	-2.2146
SAMN14515357	PRJNA621426	Agricultural Land	57.1863	-2.2145
SAMN14514966	PRJNA621430	Agricultural Land	57.1866	-2.2146
SAMN14515906	PRJNA621427	Agricultural Land	57.1863	-2.2145
SAMN14514853	PRJNA621431	Agricultural Land	57.1866	-2.2146
SAMN14515551	PRJNA621428	Agricultural Land	57.1863	-2.2145
SAMN14515548	PRJNA621429	Agricultural Land	57.1863	-2.2145
SAMN14515905	PRJNA621433	Agricultural Land	57.1863	-2.2145
SAMN14514949	PRJNA621435	Agricultural Land	57.1863	-2.2145
SAMN14515565	PRJNA621434	Agricultural Land	57.1863	-2.2145
SAMN14515579	PRJNA621442	Agricultural Land	57.1866	-2.2146
SAMN14515852	PRJNA621443	Agricultural Land	57.1866	-2.2146
SAMN14515664	PRJNA621445	Agricultural Land	57.1863	-2.2145
SAMN14514965	PRJNA621444	Agricultural Land	57.1866	-2.2146
SAMN14515663	PRJNA621447	Agricultural Land	57.1863	-2.2145
SAMN14515071	PRJNA621656	Bare Land	33.893	-115.798
SAMN14515568	PRJNA621660	Bare Land	-21.0129	-69.3515
SAMN14515345	PRJNA621665	Bare Land	35.1642	-116.873
SAMN14515641	PRJNA621666	Bare Land	35.635	-115.512
SAMN14514953	PRJNA621668	Bare Land	-27.2216	-70.3454
SAMN14515656	PRJNA621667	Bare Land	-29.3164	-71.2486
SAMN14514832	PRJNA621671	Agricultural Land	-27.73	-71.03
SAMN14515453	PRJNA621674	Bare Land	34.0413	-116.145
SAMN14515336	PRJNA621675	Agricultural Land	47.37	8.56
SAMN14515918	PRJNA621676	Bare Land	-26.1119	-70.6479
SAMN14515332	PRJNA621559	Forest	38.7866	-120.429
SAMN14515851	PRJNA621562	Forest	38.8759	-120.444
SAMN14515328	PRJNA621561	Forest	38.7577	-120.437
SAMN14515067	PRJNA621563	Forest	38.8758	-120.444
SAMN14515638	PRJNA621565	Forest	38.783	-120.278
SAMN14515919	PRJNA621564	Forest	38.7825	-120.279
SAMN14515658	PRJNA621567	Forest	39.0352	-120.442
SAMN14514955	PRJNA621570	Forest	42.5315	-72.1899
SAMN14514968	PRJNA621569	Forest	42.5315	-72.1899
SAMN02630628	PRJNA237577	Artificial Surfaces	38.7	117.5
SAMN02630628	PRJNA237577	Agricultural Land	38.7	117.5
SAMN14845652	PRJNA630822	Tundra	-76.4373	161.007
SAMN14845651	PRJNA630822	Tundra	-76.4373	161.007
SAMN14845642	PRJNA630822	Tundra	-77.0157	161.405
SAMN14845641	PRJNA630822	Tundra	-77.0138	161.428
SAMN14845650	PRJNA630822	Tundra	-76.3928	161.056
SAMN14845649	PRJNA630822	Tundra	-76.5713	161.243
SAMN14845648	PRJNA630822	Tundra	-76.5803	161.097
SAMN14845647	PRJNA630822	Tundra	-76.0965	162.01
SAMN14845645	PRJNA630822	Tundra	-76.4701	161.27
SAMN14845644	PRJNA630822	Tundra	-77.0148	161.456
SAMN14845643	PRJNA630822	Tundra	-77.011	161.426
SAMN14845656	PRJNA630822	Tundra	-77.0276	161.216
SAMN14845655	PRJNA630822	Tundra	-77.0038	162.238
SAMN14845654	PRJNA630822	Tundra	-77.65	163.116
SAMN14845653	PRJNA630822	Tundra	-76.52	161.45
SAMN14510242	PRJNA621354	Agricultural Land	39.66	-79.91
SAMN14510197	PRJNA621355	Agricultural Land	39.66	-79.91
SAMN14510417	PRJNA621356	Agricultural Land	39.66	-2.21
SAMN14510195	PRJNA621359	Agricultural Land	46.11	-2.21
SAMN14510498	PRJNA621357	Agricultural Land	46.11	-2.21
SAMN14510471	PRJNA621358	Grassland	46.11	-2.21
SAMN14510918	PRJNA620778	Agricultural Land	41.1677	-96.4108
SAMN14510873	PRJNA620779	Agricultural Land	41.1677	-96.4108
SAMN14510730	PRJNA620780	Agricultural Land	41.1677	-96.4108
SAMN14510912	PRJNA620782	Agricultural Land	41.1681	-96.4109
SAMN14510969	PRJNA620781	Agricultural Land	41.1677	-96.4108
SAMN14510884	PRJNA620784	Agricultural Land	41.1681	-96.4109
SAMN14510895	PRJNA620783	Agricultural Land	41.1681	-96.4109
SAMN14511060	PRJNA620785	Agricultural Land	41.1681	-96.4109
SAMN14987866	PRJNA634262	Agricultural Land	44.18	86.02
SAMN14987865	PRJNA634262	Agricultural Land	44.18	86.02
SAMN14987864	PRJNA634262	Agricultural Land	44.18	86.02
SAMN14987863	PRJNA634262	Agricultural Land	44.18	86.02
SAMN14995783	PRJNA634398	Artificial Surfaces	36.13	120.53
SAMN14995782	PRJNA634398	Artificial Surfaces	36.13	120.52
SAMN14995781	PRJNA634398	Artificial Surfaces	36.13	120.51
SAMN14995780	PRJNA634398	Artificial Surfaces	36.13	120.5
SAMN14995779	PRJNA634398	Artificial Surfaces	36.13	120.49
SAMN14995778	PRJNA634398	Artificial Surfaces	36.13	120.48
SAMN14995809	PRJNA634398	Artificial Surfaces	36.13	120.79
SAMN14995808	PRJNA634398	Artificial Surfaces	36.13	120.78
SAMN14995807	PRJNA634398	Artificial Surfaces	36.13	120.77
SAMN14995806	PRJNA634398	Artificial Surfaces	36.13	120.76
SAMN14995805	PRJNA634398	Artificial Surfaces	36.13	120.75
SAMN14995804	PRJNA634398	Artificial Surfaces	36.13	120.74
SAMN14995777	PRJNA634398	Artificial Surfaces	36.13	120.47
SAMN14995803	PRJNA634398	Artificial Surfaces	36.13	120.73
SAMN14995802	PRJNA634398	Artificial Surfaces	36.13	120.72
SAMN14995801	PRJNA634398	Artificial Surfaces	36.13	120.71
SAMN14995800	PRJNA634398	Artificial Surfaces	36.13	120.7
SAMN14995799	PRJNA634398	Artificial Surfaces	36.13	120.69
SAMN14995798	PRJNA634398	Artificial Surfaces	36.13	120.68
SAMN14995797	PRJNA634398	Artificial Surfaces	36.13	120.67
SAMN14995796	PRJNA634398	Artificial Surfaces	36.13	120.66
SAMN14995795	PRJNA634398	Artificial Surfaces	36.13	120.65
SAMN14995794	PRJNA634398	Artificial Surfaces	36.13	120.64
SAMN14995776	PRJNA634398	Artificial Surfaces	36.13	120.46
SAMN14995793	PRJNA634398	Artificial Surfaces	36.13	120.63
SAMN14995792	PRJNA634398	Artificial Surfaces	36.13	120.62
SAMN14995791	PRJNA634398	Artificial Surfaces	36.13	120.61
SAMN14995790	PRJNA634398	Artificial Surfaces	36.13	120.6
SAMN14995789	PRJNA634398	Artificial Surfaces	36.13	120.59
SAMN14995788	PRJNA634398	Artificial Surfaces	36.13	120.58
SAMN14995786	PRJNA634398	Artificial Surfaces	36.13	120.56
SAMN14995784	PRJNA634398	Artificial Surfaces	36.13	120.54
SAMN14995775	PRJNA634398	Artificial Surfaces	36.13	120.45
SAMN14995774	PRJNA634398	Artificial Surfaces	36.13	120.44
SAMN14510897	PRJNA620620	Grassland	-33.6	150
SAMN14511055	PRJNA620621	Agricultural Land	35.5	-121
SAMN14510729	PRJNA620622	Agricultural Land	35.5	-121
SAMN14510862	PRJNA620625	Agricultural Land	-34.5	150
SAMN14510878	PRJNA620624	Agricultural Land	-34.5	150
SAMN14510936	PRJNA620623	Agricultural Land	37	-122.2
SAMN14510921	PRJNA620626	Agricultural Land	-34.5	150
SAMN14510954	PRJNA620627	Agricultural Land	-33.6	150
SAMN14510940	PRJNA620628	Forest	-33.6	150
SAMN14510930	PRJNA620629	Grassland	35.5	-121
SAMN14511041	PRJNA620630	Grassland	35.5	-121
SAMN14510939	PRJNA620632	Forest	-33.6	150
SAMN14510776	PRJNA620633	Forest	-33.6	150
SAMN14510870	PRJNA620634	Agricultural Land	-34.5	150
SAMN14510775	PRJNA620635	Agricultural Land	-34.5	150
SAMN14510937	PRJNA620636	Grassland	-33.6	150
SAMN14510737	PRJNA620637	Grassland	35.5	-121
SAMN14510740	PRJNA620642	Agricultural Land	-33.6	150
SAMN14510951	PRJNA620645	Grassland	37	-122.2
SAMN14510763	PRJNA620646	Forest	-33.6	150
SAMN14511050	PRJNA620647	Grassland	-33.6	150
SAMN14510950	PRJNA620649	Grassland	-34.5	150
SAMN14510887	PRJNA620650	Grassland	35.5	-121
SAMN14510885	PRJNA620651	Grassland	36.5	-121.8
SAMN14510732	PRJNA620652	Grassland	37	-122.2
SAMN14510991	PRJNA620653	Grassland	-33.6	150
SAMN14510990	PRJNA620654	Grassland	-33.6	150
SAMN14510764	PRJNA620655	Grassland	-34.5	150
SAMN14510736	PRJNA620657	Grassland	-34.5	150
SAMN14510949	PRJNA620656	Grassland	-34.5	150
SAMN14510896	PRJNA620658	Shrubland	35.5	-121
SAMN14510727	PRJNA620659	Forest	36.5	-121.8
SAMN14510739	PRJNA620660	Forest	37	-122.2
SAMN14510945	PRJNA620661	Agricultural Land	-34.5	150
SAMN14510989	PRJNA620662	Forest	-33.6	150
SAMN14510960	PRJNA620663	Forest	-34.5	150
SAMN14510931	PRJNA620664	Agricultural Land	36.5	-121.8
SAMN14510919	PRJNA620665	Agricultural Land	-33.6	150
SAMN14510974	PRJNA620667	Agricultural Land	-34.5	150
SAMN14510948	PRJNA620510	Grassland	-34.5	150
SAMN14510772	PRJNA620511	Grassland	-34.5	150
SAMN14511042	PRJNA620648	Grassland	-34.5	150
SAMN14510946	PRJNA620643	Wetland	35.5	-121
SAMN14510975	PRJNA620644	Wetland	36.5	-121.8
SAMN02671747	PRJNA239941	Agricultural Land	27.6218	111.464
SAMN15332071	PRJNA640795	Artificial Surfaces	36.13	120.54
SAMN15332070	PRJNA640795	Artificial Surfaces	36.13	120.53
SAMN15332069	PRJNA640795	Artificial Surfaces	36.13	120.52
SAMN15332068	PRJNA640795	Artificial Surfaces	36.13	120.51
SAMN15332067	PRJNA640795	Artificial Surfaces	36.13	120.5
SAMN15332066	PRJNA640795	Artificial Surfaces	36.13	120.49
SAMN15332065	PRJNA640795	Artificial Surfaces	36.13	120.48
SAMN15332064	PRJNA640795	Artificial Surfaces	36.13	120.47
SAMN15332081	PRJNA640795	Artificial Surfaces	36.13	120.64
SAMN15332080	PRJNA640795	Artificial Surfaces	36.13	120.63
SAMN15332079	PRJNA640795	Artificial Surfaces	36.13	120.62
SAMN15332078	PRJNA640795	Artificial Surfaces	36.13	120.61
SAMN15332077	PRJNA640795	Artificial Surfaces	36.13	120.6
SAMN15332076	PRJNA640795	Artificial Surfaces	36.13	120.59
SAMN15332075	PRJNA640795	Artificial Surfaces	36.13	120.58
SAMN15332074	PRJNA640795	Artificial Surfaces	36.13	120.57
SAMN15332073	PRJNA640795	Artificial Surfaces	36.13	120.56
SAMN15332072	PRJNA640795	Artificial Surfaces	36.13	120.55
SAMN15332063	PRJNA640795	Artificial Surfaces	36.13	120.46
SAMN15332062	PRJNA640795	Artificial Surfaces	36.13	120.45
SAMN09947802	PRJNA488994	Artificial Surfaces	46.06	14.28
SAMN09947802	PRJNA488994	Artificial Surfaces	46.06	14.28
SAMN09947802	PRJNA488994	Artificial Surfaces	46.06	14.28
SAMN09947802	PRJNA488994	Artificial Surfaces	46.06	14.28
SAMN09947801	PRJNA488994	Artificial Surfaces	46.06	14.28
SAMN09947801	PRJNA488994	Artificial Surfaces	46.06	14.28
SAMN09947801	PRJNA488994	Artificial Surfaces	46.06	14.28
SAMN09947801	PRJNA488994	Artificial Surfaces	46.06	14.28
SAMN15367012	PRJNA641804	Agricultural Land	-12.37	130.867
SAMN15367011	PRJNA641804	Agricultural Land	-12.37	130.867
SAMN15367010	PRJNA641804	Agricultural Land	-12.37	130.867
SAMN15394152	PRJNA642232	Bare Land	29.9415	34.9748
SAMN15394151	PRJNA642232	Bare Land	30.7853	34.7673
SAMN15394150	PRJNA642232	Bare Land	30.6092	34.7458
SAMN15394149	PRJNA642232	Bare Land	30.6092	34.7458
SAMN15394148	PRJNA642232	Bare Land	31.3492	34.9131
SAMN15394147	PRJNA642232	Bare Land	31.3458	34.9133
SAMN15394146	PRJNA642232	Bare Land	31.2533	34.7528
SAMN15394145	PRJNA642232	Shrubland	31.6303	34.9147
SAMN15394154	PRJNA642232	Bare Land	30.405	34.9492
SAMN15394144	PRJNA642232	Shrubland	31.6422	34.933
SAMN15394143	PRJNA642232	Shrubland	31.6424	34.935
SAMN15376387	PRJNA641877	Artificial Surfaces	48.99	14.16
SAMN14510724	PRJNA620821	Agricultural Land	26.6541	-80.6298
SAMN15470939	PRJNA644680	Agricultural Land	29.64	-82.34
SAMN15470938	PRJNA644680	Agricultural Land	29.64	-82.34
SAMN15470937	PRJNA644680	Agricultural Land	29.64	-82.34
SAMN15470936	PRJNA644680	Agricultural Land	29.64	-82.34
SAMN15470935	PRJNA644680	Agricultural Land	29.64	-82.34
SAMN15470934	PRJNA644680	Agricultural Land	29.64	-82.34
SAMN15470933	PRJNA644680	Agricultural Land	29.64	-82.34
SAMN15470932	PRJNA644680	Agricultural Land	29.64	-82.34
SAMN15470941	PRJNA644680	Agricultural Land	29.64	-82.34
SAMN15470940	PRJNA644680	Agricultural Land	29.64	-82.34
SAMN15470931	PRJNA644680	Agricultural Land	29.64	-82.34
SAMN15470930	PRJNA644680	Agricultural Land	29.64	-82.34
SAMN15502456	PRJNA645371	Agricultural Land	-25.59	26.31
SAMN15502455	PRJNA645371	Agricultural Land	-25.59	26.31
SAMN15502453	PRJNA645371	Agricultural Land	-25.59	26.31
SAMN15575894	PRJNA647119	Tundra	46.49	9.93
SAMN15575893	PRJNA647119	Tundra	46.49	9.93
SAMN15575892	PRJNA647119	Tundra	46.49	9.93
SAMN15575891	PRJNA647119	Tundra	46.49	9.93
SAMN15575890	PRJNA647119	Tundra	46.49	9.93
SAMN15575889	PRJNA647119	Tundra	46.49	9.93
SAMN15575888	PRJNA647119	Tundra	46.49	9.93
SAMN15575887	PRJNA647119	Tundra	46.49	9.93
SAMN15575896	PRJNA647119	Tundra	46.49	9.93
SAMN15575895	PRJNA647119	Tundra	46.49	9.93
SAMN15575886	PRJNA647119	Tundra	46.49	9.93
SAMN15575885	PRJNA647119	Tundra	46.49	9.93
SAMN15596732	PRJNA647683	Bare Land	-30.4704	137.136
SAMN15596731	PRJNA647683	Bare Land	-30.4704	137.136
SAMN15596730	PRJNA647683	Bare Land	-30.4704	137.136
SAMN15596729	PRJNA647683	Bare Land	-30.4704	137.136
SAMN15596728	PRJNA647683	Bare Land	-30.4704	137.136
SAMN15596727	PRJNA647683	Bare Land	-30.4704	137.136
SAMN15596735	PRJNA647683	Bare Land	35.8171	-114.916
SAMN15596734	PRJNA647683	Bare Land	39.9022	96.2267
SAMN15596733	PRJNA647683	Bare Land	-23.3107	15.5346
SAMN15596730	PRJNA647683	Bare Land	-30.4704	137.136
SAMN15596729	PRJNA647683	Bare Land	-30.4704	137.136
SAMN15596726	PRJNA647683	Bare Land	-30.4704	137.136
SAMN15596726	PRJNA647683	Bare Land	-30.4704	137.136
SAMN14504062	PRJNA617094	Bare Land	35.5039	-115.692
SAMN15657755	PRJNA634794	Artificial Surfaces	27.4448	111.352
SAMN15657754	PRJNA634794	Artificial Surfaces	27.4448	111.351
SAMN15657753	PRJNA634794	Artificial Surfaces	27.4448	111.35
SAMN15657752	PRJNA634794	Artificial Surfaces	27.4448	111.349
SAMN15657751	PRJNA634794	Artificial Surfaces	27.4448	111.348
SAMN15657750	PRJNA634794	Artificial Surfaces	27.4448	111.347
SAMN15657749	PRJNA634794	Artificial Surfaces	27.4448	111.346
SAMN15657748	PRJNA634794	Artificial Surfaces	27.4448	111.345
SAMN15657759	PRJNA634794	Artificial Surfaces	27.4448	111.356
SAMN15657758	PRJNA634794	Artificial Surfaces	27.4448	111.355
SAMN15657757	PRJNA634794	Artificial Surfaces	27.4448	111.354
SAMN15657756	PRJNA634794	Artificial Surfaces	27.4448	111.353
SAMN15657747	PRJNA634794	Artificial Surfaces	27.4448	111.344
SAMN15657746	PRJNA634794	Artificial Surfaces	27.4448	111.343
SAMN14506025	PRJNA617098	Bare Land	40.23	-112.465
SAMN14505069	PRJNA617099	Bare Land	34.0997	-115.455
SAMN14502839	PRJNA617101	Bare Land	35.635	-115.512
SAMN14502588	PRJNA617103	Bare Land	34.0655	-116.17
SAMN14502557	PRJNA617106	Bare Land	33.9461	-115.904
SAMN14502647	PRJNA617108	Grassland	40.822	-104.713
SAMN15709476	PRJNA650496	Artificial Surfaces	46.7088	10.3885
SAMN15709475	PRJNA650496	Artificial Surfaces	46.7088	10.3885
SAMN15709474	PRJNA650496	Artificial Surfaces	46.7088	10.3885
SAMN15709473	PRJNA650496	Artificial Surfaces	46.7088	10.3885
SAMN15709472	PRJNA650496	Artificial Surfaces	46.7088	10.3885
SAMN15709471	PRJNA650496	Artificial Surfaces	46.7088	10.3885
SAMN15709470	PRJNA650496	Artificial Surfaces	46.7088	10.3885
SAMN15709469	PRJNA650496	Artificial Surfaces	46.7088	10.3885
SAMN15709481	PRJNA650496	Artificial Surfaces	46.7088	10.3886
SAMN15709480	PRJNA650496	Artificial Surfaces	46.7088	10.3886
SAMN15709479	PRJNA650496	Artificial Surfaces	46.7088	10.3886
SAMN15709478	PRJNA650496	Artificial Surfaces	46.7088	10.3886
SAMN15709477	PRJNA650496	Artificial Surfaces	46.7088	10.3886
SAMN15709468	PRJNA650496	Artificial Surfaces	46.7088	10.3885
SAMN15709467	PRJNA650496	Artificial Surfaces	46.7088	10.3885
SAMN14505472	PRJNA617223	Grassland	41.8784	-89.3541
SAMN14505825	PRJNA617222	Grassland	41.9035	-89.3341
SAMN15747071	PRJNA655627	Agricultural Land	-25.99	26.52
SAMN15747070	PRJNA655627	Agricultural Land	-25.99	26.52
SAMN15747067	PRJNA655627	Agricultural Land	-25.99	26.52
SAMN15772035	PRJNA656125	Grassland	-37.9265	145.313
SAMN15772034	PRJNA656125	Grassland	-37.9265	145.313
SAMN15772033	PRJNA656125	Forest	-37.4464	144.47
SAMN15772032	PRJNA656125	Forest	-37.4464	144.47
SAMN15772031	PRJNA656125	Forest	-37.4464	144.47
SAMN15772030	PRJNA656125	Forest	-37.4464	144.47
SAMN15772029	PRJNA656125	Bare Land	-23.9778	133.713
SAMN15772028	PRJNA656125	Bare Land	-23.9778	133.713
SAMN15772041	PRJNA656125	Wetland	-37.9086	145.14
SAMN15772040	PRJNA656125	Wetland	-37.9086	145.14
SAMN15772039	PRJNA656125	Wetland	-37.9086	145.14
SAMN15772038	PRJNA656125	Wetland	-37.9086	145.14
SAMN15772037	PRJNA656125	Grassland	-37.9265	145.313
SAMN15772036	PRJNA656125	Grassland	-37.9265	145.313
SAMN15772027	PRJNA656125	Bare Land	-23.9778	133.713
SAMN15772026	PRJNA656125	Bare Land	-23.9778	133.713
SAMN15851667	PRJNA657906	Bare Land	29.9415	34.9748
SAMN15851666	PRJNA657906	Bare Land	30.7853	34.7673
SAMN15851665	PRJNA657906	Bare Land	30.6092	34.7458
SAMN15851664	PRJNA657906	Bare Land	30.6092	34.7458
SAMN15851663	PRJNA657906	Bare Land	31.3492	34.9131
SAMN15851662	PRJNA657906	Bare Land	31.3458	34.9133
SAMN15851661	PRJNA657906	Bare Land	31.2533	34.7528
SAMN15851660	PRJNA657906	Bare Land	31.6303	34.9147
SAMN15851669	PRJNA657906	Bare Land	30.405	34.9492
SAMN15851668	PRJNA657906	Bare Land	30.4056	34.9506
SAMN15851659	PRJNA657906	Bare Land	31.6422	34.933
SAMN15851658	PRJNA657906	Bare Land	31.6424	34.935
SAMN16076883	PRJNA662109	Grassland	43.35	116.4
SAMN16076882	PRJNA662109	Grassland	44.14	116.31
SAMN16076881	PRJNA662109	Grassland	43.34	116.4
SAMN16076880	PRJNA662109	Grassland	43.33	116.4
SAMN16076879	PRJNA662109	Grassland	43.32	116.4
SAMN16076887	PRJNA662109	Grassland	44.16	116.31
SAMN16076886	PRJNA662109	Grassland	44.15	116.31
SAMN16076885	PRJNA662109	Grassland	43.37	116.4
SAMN16076884	PRJNA662109	Grassland	43.36	116.4
SAMN16176657	PRJNA663662	Wetland	-12.37	130.867
SAMN15738938	PRJNA655053	Bare Land	34.7856	-115.66
SAMN15738962	PRJNA654927	Forest	42.5315	-72.1899
SAMN15739099	PRJNA654925	Forest	42.5315	-72.1899
SAMN15738825	PRJNA654928	Forest	42.5315	-72.1899
SAMN15738865	PRJNA654926	Forest	42.5315	-72.1899
SAMN15738936	PRJNA654929	Forest	42.5315	-72.1899
SAMN15739100	PRJNA654933	Forest	42.5315	-72.1899
SAMN15738998	PRJNA654931	Forest	42.5315	-72.1899
SAMN15738999	PRJNA654930	Forest	42.5315	-72.1899
SAMN15738961	PRJNA654934	Forest	42.5315	-72.1899
SAMN15738811	PRJNA654762	Agricultural Land	42.0127	-93.7445
SAMN15738856	PRJNA654766	Agricultural Land	42.0127	-93.7445
SAMN15738875	PRJNA654771	Agricultural Land	42.0127	-93.7445
SAMN15738855	PRJNA654767	Agricultural Land	42.0127	-93.7445
SAMN15739109	PRJNA654770	Agricultural Land	42.0127	-93.7445
SAMN15738889	PRJNA654768	Agricultural Land	42.0127	-93.7445
SAMN15738888	PRJNA654769	Agricultural Land	42.0127	-93.7445
SAMN15738987	PRJNA654765	Agricultural Land	42.0127	-93.7445
SAMN15739572	PRJNA653492	Bare Land	35.5039	-115.692
SAMN15741245	PRJNA653779	Wetland	36	-78
SAMN15741801	PRJNA653780	Wetland	36	-78
SAMN15739565	PRJNA653782	Wetland	36	-78
SAMN15741229	PRJNA653781	Wetland	36	-78
SAMN16238504	PRJNA665014	Forest	-21.7085	-47.5825
SAMN16238503	PRJNA665014	Forest	-21.7085	-47.5825
SAMN16238502	PRJNA665014	Forest	-21.7085	-47.5825
SAMN16238501	PRJNA665014	Forest	-21.7085	-47.5825
SAMN16238500	PRJNA665014	Agricultural Land	-21.7085	-47.5825
SAMN16238498	PRJNA665014	Agricultural Land	-21.7085	-47.5825
SAMN16238497	PRJNA665014	Agricultural Land	-21.7085	-47.5825
SAMN16238506	PRJNA665014	Forest	-21.7085	-47.5825
SAMN16238505	PRJNA665014	Forest	-21.7085	-47.5825
SAMN16238496	PRJNA665014	Agricultural Land	-21.7085	-47.5825
SAMN16238495	PRJNA665014	Agricultural Land	-21.7085	-47.5825
SAMN16276741	PRJNA666015	Bare Land	26.14	105.42
SAMN16276740	PRJNA666015	Agricultural Land	26.14	105.42
SAMN16276739	PRJNA666015	Agricultural Land	26.14	105.42
SAMN16276738	PRJNA666015	Agricultural Land	26.14	105.42
SAMN16276737	PRJNA666015	Shrubland	26.14	105.42
SAMN16276736	PRJNA666015	Shrubland	26.14	105.42
SAMN16276735	PRJNA666015	Shrubland	26.14	105.42
SAMN16276734	PRJNA666015	Grassland	26.14	105.42
SAMN16276743	PRJNA666015	Bare Land	26.14	105.42
SAMN16276742	PRJNA666015	Bare Land	26.14	105.42
SAMN16276733	PRJNA666015	Grassland	26.14	105.42
SAMN16276732	PRJNA666015	Grassland	26.14	105.42
SAMN16293040	PRJNA666429	Tundra	68.38	-149.43
SAMN16293039	PRJNA666429	Tundra	68.38	-149.43
SAMN16293038	PRJNA666429	Tundra	68.38	-149.43
SAMN16293037	PRJNA666429	Tundra	68.38	-149.43
SAMN16293036	PRJNA666429	Tundra	68.38	-149.43
SAMN16293035	PRJNA666429	Tundra	68.38	-149.43
SAMN16293034	PRJNA666429	Tundra	68.38	-149.43
SAMN16293033	PRJNA666429	Tundra	68.38	-149.43
SAMN16293045	PRJNA666429	Tundra	68.38	-149.43
SAMN16293044	PRJNA666429	Tundra	68.38	-149.43
SAMN16293043	PRJNA666429	Tundra	68.38	-149.43
SAMN16293041	PRJNA666429	Tundra	68.38	-149.43
SAMN16293032	PRJNA666429	Tundra	68.38	-149.43
SAMN16293031	PRJNA666429	Tundra	68.38	-149.43
SAMN16351209	PRJNA667025	Artificial Surfaces	23.13	113.28
SAMN16362768	PRJNA667256	Agricultural Land	49.7002	-112.763
SAMN16362766	PRJNA667256	Agricultural Land	49.7002	-112.763
SAMN16362764	PRJNA667256	Agricultural Land	49.7002	-112.763
SAMN16362782	PRJNA667256	Agricultural Land	49.7002	-112.763
SAMN16362780	PRJNA667256	Agricultural Land	49.7002	-112.763
SAMN16362762	PRJNA667256	Agricultural Land	49.7002	-112.763
SAMN16362778	PRJNA667256	Agricultural Land	49.7002	-112.763
SAMN16362776	PRJNA667256	Agricultural Land	49.7002	-112.763
SAMN16362774	PRJNA667256	Agricultural Land	49.7002	-112.763
SAMN16362772	PRJNA667256	Agricultural Land	49.7002	-112.763
SAMN16362770	PRJNA667256	Agricultural Land	49.7002	-112.763
SAMN16362760	PRJNA667256	Agricultural Land	49.7002	-112.763
SAMN16294744	PRJNA666233	Artificial Surfaces	29.58	111.64
SAMN16294743	PRJNA666233	Artificial Surfaces	29.58	111.63
SAMN16294742	PRJNA666233	Artificial Surfaces	29.58	111.62
SAMN16294741	PRJNA666233	Artificial Surfaces	29.58	111.61
SAMN16434008	PRJNA669067	Agricultural Land	46.2528	-119.737
SAMN16434007	PRJNA669067	Agricultural Land	46.2528	-119.737
SAMN16434006	PRJNA669067	Agricultural Land	46.2528	-119.737
SAMN16434005	PRJNA669067	Agricultural Land	46.2528	-119.737
SAMN16434004	PRJNA669067	Agricultural Land	46.2528	-119.737
SAMN16434003	PRJNA669067	Agricultural Land	46.2528	-119.737
SAMN16434002	PRJNA669067	Agricultural Land	46.2528	-119.737
SAMN16434022	PRJNA669067	Agricultural Land	46.2528	-119.737
SAMN16434021	PRJNA669067	Agricultural Land	46.2528	-119.737
SAMN16434020	PRJNA669067	Agricultural Land	46.2528	-119.737
SAMN16434019	PRJNA669067	Agricultural Land	46.2528	-119.737
SAMN16434001	PRJNA669067	Agricultural Land	46.2528	-119.737
SAMN16434018	PRJNA669067	Agricultural Land	46.2528	-119.737
SAMN16434017	PRJNA669067	Agricultural Land	46.2528	-119.737
SAMN16434015	PRJNA669067	Agricultural Land	46.2528	-119.737
SAMN16434014	PRJNA669067	Agricultural Land	46.2528	-119.737
SAMN16434013	PRJNA669067	Agricultural Land	46.2528	-119.737
SAMN16434012	PRJNA669067	Agricultural Land	46.2528	-119.737
SAMN16434011	PRJNA669067	Agricultural Land	46.2528	-119.737
SAMN16434009	PRJNA669067	Agricultural Land	46.2528	-119.737
SAMN16434000	PRJNA669067	Agricultural Land	46.2528	-119.737
SAMN16433999	PRJNA669067	Agricultural Land	46.2528	-119.737
SAMN16448809	PRJNA669350	Artificial Surfaces	31.64	120.74
SAMN16448808	PRJNA669350	Artificial Surfaces	31.64	120.74
SAMN16448807	PRJNA669350	Artificial Surfaces	31.64	120.74
SAMN16448806	PRJNA669350	Artificial Surfaces	31.64	120.74
SAMN16448805	PRJNA669350	Artificial Surfaces	31.64	120.74
SAMN16448804	PRJNA669350	Artificial Surfaces	31.64	120.74
SAMN16448803	PRJNA669350	Artificial Surfaces	31.64	120.74
SAMN16448829	PRJNA669350	Artificial Surfaces	28.23	117.02
SAMN16448828	PRJNA669350	Artificial Surfaces	28.23	117.02
SAMN16448826	PRJNA669350	Artificial Surfaces	28.23	117.02
SAMN16448825	PRJNA669350	Artificial Surfaces	28.23	117.02
SAMN16448824	PRJNA669350	Artificial Surfaces	28.23	117.02
SAMN16448823	PRJNA669350	Artificial Surfaces	28.23	117.02
SAMN16448822	PRJNA669350	Artificial Surfaces	28.23	117.02
SAMN16448821	PRJNA669350	Artificial Surfaces	28.23	117.02
SAMN16448820	PRJNA669350	Artificial Surfaces	28.23	117.02
SAMN16448819	PRJNA669350	Artificial Surfaces	28.23	117.02
SAMN16448818	PRJNA669350	Artificial Surfaces	28.23	117.02
SAMN16448814	PRJNA669350	Artificial Surfaces	31.64	120.74
SAMN16448813	PRJNA669350	Artificial Surfaces	31.64	120.74
SAMN16448812	PRJNA669350	Artificial Surfaces	31.64	120.74
SAMN16448811	PRJNA669350	Artificial Surfaces	31.64	120.74
SAMN16448810	PRJNA669350	Artificial Surfaces	31.64	120.74
SAMN15739872	PRJNA653690	Grassland	41.9002	-89.3556
SAMN15740533	PRJNA653691	Grassland	41.9002	-89.3556
SAMN15739656	PRJNA653687	Grassland	41.9002	-89.352
SAMN15740535	PRJNA653686	Grassland	41.9002	-89.352
SAMN15739655	PRJNA653689	Grassland	41.9002	-89.3556
SAMN15741225	PRJNA653688	Grassland	41.9002	-89.352
SAMN15740181	PRJNA653693	Grassland	41.9035	-89.3341
SAMN15741598	PRJNA653695	Grassland	41.896	-89.3636
SAMN15739576	PRJNA653697	Grassland	41.8725	-89.3578
SAMN15741939	PRJNA653696	Grassland	41.896	-89.3636
SAMN15740521	PRJNA653698	Grassland	41.8725	-89.3578
SAMN15740168	PRJNA653701	Grassland	41.8784	-89.3541
SAMN15741597	PRJNA653700	Grassland	41.8784	-89.3541
SAMN15741247	PRJNA653699	Grassland	41.8725	-89.3578
SAMN15740725	PRJNA653702	Grassland	41.8854	-89.3208
SAMN15741583	PRJNA653703	Grassland	41.8854	-89.3208
SAMN15741805	PRJNA653705	Grassland	41.893	-89.305
SAMN15721755	PRJNA651860	Agricultural Land	40.0633	-88.2058
SAMN15721494	PRJNA651862	Agricultural Land	40.0633	-88.2058
SAMN15721184	PRJNA651861	Agricultural Land	40.0633	-88.2058
SAMN15720690	PRJNA650881	Bare Land	35.5039	-115.692
SAMN15720683	PRJNA650826	Bare Land	34.1098	-115.48
SAMN16802408	PRJNA678469	Agricultural Land	-25.99	26.52
SAMN16802406	PRJNA678469	Agricultural Land	-25.99	26.52
SAMN16802405	PRJNA678469	Agricultural Land	-25.99	26.52
SAMN16802727	PRJNA678475	Agricultural Land	-26.11	27.33
SAMN06859935	PRJNA382640	Artificial Surfaces	51.6	9.9
SAMN06859928	PRJNA382640	Artificial Surfaces	51.6	9.9
SAMN15740461	PRJNA653704	Grassland	41.8854	-89.3208
SAMN16773911	PRJNA677055	Forest	33.88	-115.91
SAMN16773260	PRJNA677056	Bare Land	33.8188	-115.764
SAMN02850905	PRJNA252520	Wetland	20.02	-110.35
SAMN03075697	PRJNA261849	Tundra	79.4161	-90.763
SAMN03075699	PRJNA261849	Tundra	79.4161	-90.763
SAMN03075701	PRJNA261849	Tundra	79.4161	-90.763
SAMN03075703	PRJNA261849	Tundra	79.4161	-90.763
SAMN03075706	PRJNA261849	Tundra	79.4161	-90.763
SAMN03075707	PRJNA261849	Tundra	79.4161	-90.763
SAMN03075713	PRJNA261849	Tundra	79.4161	-90.763
SAMN03075716	PRJNA261849	Tundra	79.4161	-90.763
SAMN03075717	PRJNA261849	Tundra	79.4161	-90.763
SAMN03075718	PRJNA261849	Tundra	79.4161	-90.763
SAMN03075723	PRJNA261849	Tundra	79.4161	-90.763
SAMN03075725	PRJNA261849	Tundra	79.4161	-90.763
SAMN03075726	PRJNA261849	Tundra	79.4161	-90.763
SAMN03075729	PRJNA261849	Tundra	79.4161	-90.763
SAMN03075732	PRJNA261849	Tundra	79.4161	-90.763
SAMN03075735	PRJNA261849	Tundra	79.4161	-90.763
SAMN03075737	PRJNA261849	Tundra	79.4161	-90.763
SAMN03075741	PRJNA261849	Tundra	79.4161	-90.763
SAMN03075744	PRJNA261849	Tundra	79.4161	-90.763
SAMN03075747	PRJNA261849	Tundra	79.4161	-90.763
SAMN03075756	PRJNA261849	Tundra	79.4161	-90.763
SAMN03075758	PRJNA261849	Tundra	79.4161	-90.763
SAMN03407312	PRJNA278090	Agricultural Land	-19.733	147.178
SAMN03407316	PRJNA278090	Agricultural Land	-19.733	147.178
SAMN03407320	PRJNA278090	Agricultural Land	-19.733	147.178
SAMN03407324	PRJNA278090	Agricultural Land	-19.733	147.178
SAMN03407336	PRJNA278090	Agricultural Land	-19.733	147.178
SAMN03407328	PRJNA278090	Agricultural Land	-19.733	147.178
SAMN03407334	PRJNA278090	Agricultural Land	-19.733	147.178
SAMN03460428	PRJNA280386	Artificial Surfaces	10	76.3
SAMN03700006	PRJNA284199	Wetland	50.1467	12.4508
SAMN03700006	PRJNA284199	Wetland	50.1467	12.4508
SAMN03700006	PRJNA284199	Wetland	50.1467	12.4508
SAMN03777194	PRJNA287178	Agricultural Land	21.0887	105.734
SAMN03777195	PRJNA287178	Agricultural Land	21.0884	105.727
SAMN03777196	PRJNA287178	Agricultural Land	21.0884	105.727
SAMN03784300	PRJNA287582	Agricultural Land	21.0884	105.727
SAMN03784301	PRJNA287582	Agricultural Land	21.0884	105.727
SAMN03846801	PRJNA289185	Agricultural Land	24.5283	110.917
SAMN04116728	PRJNA297196	Grassland	34.09	-118.43
SAMN04116729	PRJNA297196	Grassland	34.09	-118.43
SAMN04116732	PRJNA297196	Grassland	34.09	-118.43
SAMN04116735	PRJNA297196	Grassland	34.09	-118.43
SAMN04191406	PRJNA298972	Wetland	8.5	76.7
SAMN02440304	PRJNA202911	Artificial Surfaces	48.4244	-123.388
SAMN02440304	PRJNA202911	Artificial Surfaces	48.4244	-123.388
SAMN02440304	PRJNA202911	Artificial Surfaces	48.4244	-123.388
SAMN04286060	PRJNA303119	Bare Land	37.293	103.724
SAMN04286061	PRJNA303119	Bare Land	37.293	103.724
SAMN04013418	PRJNA294203	Artificial Surfaces	23.39	120.48
SAMN04622706	PRJNA317648	Artificial Surfaces	45.41	-73.25
SAMN04622708	PRJNA317648	Artificial Surfaces	45.41	-73.25
SAMN04622709	PRJNA317648	Artificial Surfaces	45.41	-73.25
SAMN04622711	PRJNA317648	Artificial Surfaces	45.41	-73.25
SAMN04622713	PRJNA317648	Artificial Surfaces	45.41	-73.25
SAMN04622736	PRJNA317648	Artificial Surfaces	45.41	-73.25
SAMN04622738	PRJNA317648	Artificial Surfaces	45.41	-73.25
SAMN04622739	PRJNA317648	Artificial Surfaces	45.41	-73.25
SAMN04622741	PRJNA317648	Artificial Surfaces	45.41	-73.25
SAMN04622743	PRJNA317648	Artificial Surfaces	45.41	-73.25
SAMN04622770	PRJNA317648	Artificial Surfaces	45.41	-73.25
SAMN04622772	PRJNA317648	Artificial Surfaces	45.41	-73.25
SAMN04622773	PRJNA317648	Artificial Surfaces	45.41	-73.25
SAMN04622775	PRJNA317648	Artificial Surfaces	45.41	-73.25
SAMN04622777	PRJNA317648	Artificial Surfaces	45.41	-73.25
SAMN04622784	PRJNA317648	Artificial Surfaces	45.41	-73.25
SAMN04622785	PRJNA317648	Artificial Surfaces	45.41	-73.25
SAMN04622786	PRJNA317648	Artificial Surfaces	45.41	-73.25
SAMN04286062	PRJNA303119	Bare Land	37.293	103.724
SAMN04286063	PRJNA303119	Bare Land	37.293	103.724
SAMN04286064	PRJNA303119	Bare Land	37.293	103.724
SAMN04286065	PRJNA303119	Bare Land	37.293	103.724
SAMN00728605	NA	Agricultural Land	37.29	-103.72
SAMN00728605	NA	Agricultural Land	43.91	-89.46
SAMN00728626	NA	Agricultural Land	43.91	-89.46
SAMN00728644	NA	Agricultural Land	43.91	-89.46
SAMN00736155	NA	Agricultural Land	43.91	-89.46
SAMN00736155	NA	Agricultural Land	43.91	-89.46
SAMN00736155	NA	Agricultural Land	43.91	-89.46
SAMN00736182	NA	Agricultural Land	43.91	-89.46
SAMN00736182	NA	Agricultural Land	42.45	-92.4
SAMN00737747	PRJNA50473	Agricultural Land	41.6381	-93.7753
SAMN00737747	PRJNA50473	Agricultural Land	41.6381	-93.7753
SAMN00737747	PRJNA50473	Agricultural Land	41.6381	-93.7753
SAMN00737747	PRJNA50473	Agricultural Land	41.6381	-93.7753
SAMN00737747	PRJNA50473	Agricultural Land	41.6381	-93.7753
SAMN05149955	PRJNA322166	Artificial Surfaces	47.59	7.58
SAMN05149956	PRJNA322166	Artificial Surfaces	47.59	7.58
SAMN05170379	PRJNA322576	Agricultural Land	-25.0255	152.38
SAMN05170380	PRJNA322576	Agricultural Land	-25.0255	152.38
SAMN05170381	PRJNA322576	Agricultural Land	-25.0255	152.38
SAMN05170383	PRJNA322576	Agricultural Land	-25.0255	152.38
SAMN05170389	PRJNA322576	Agricultural Land	-25.0255	152.38
SAMN05170390	PRJNA322576	Agricultural Land	-25.0255	152.38
SAMN05215995	PRJNA324829	Artificial Surfaces	47.59	7.58
SAMN05257335	PRJNA281298	Bare Land	-19.0313	15.5486
SAMN05257336	PRJNA281298	Bare Land	-19.0313	15.5486
SAMN05257337	PRJNA281298	Bare Land	-19.0313	15.5486
SAMN05257338	PRJNA281298	Bare Land	-19.0313	15.5486
SAMN05257339	PRJNA281298	Bare Land	-19.0313	15.5486
SAMN05257340	PRJNA281298	Bare Land	-19.0313	15.5486
SAMN05257341	PRJNA281298	Bare Land	-19.0313	15.5486
SAMN05257342	PRJNA281298	Bare Land	-19.0371	15.5536
SAMN05257343	PRJNA281298	Bare Land	-19.0371	15.5536
SAMN05257344	PRJNA281298	Bare Land	-19.0371	15.5536
SAMN05257345	PRJNA281298	Bare Land	-19.0371	15.5536
SAMN05257346	PRJNA281298	Bare Land	-19.0371	15.5536
SAMN05257347	PRJNA281298	Bare Land	-19.0371	15.5536
SAMN05257348	PRJNA281298	Bare Land	-19.0371	15.5536
SAMN05357635	PRJNA327808	Agricultural Land	42.98	-81.24
SAMN05357639	PRJNA327808	Agricultural Land	42.98	-81.24
SAMN05357640	PRJNA327808	Agricultural Land	42.98	-81.24
SAMN05357641	PRJNA327808	Agricultural Land	42.98	-81.24
SAMN05357642	PRJNA327808	Agricultural Land	42.98	-81.24
SAMN05415049	PRJNA329571	Artificial Surfaces	23.118	113.471
SAMN05422231	PRJNA330082	Grassland	38.993	-123.067
SAMN05422231	PRJNA330082	Grassland	38.993	-123.067
SAMN05422231	PRJNA330082	Grassland	38.993	-123.067
SAMN05422231	PRJNA330082	Grassland	38.993	-123.067
SAMN05422231	PRJNA330082	Grassland	38.993	-123.067
SAMN05422231	PRJNA330082	Grassland	38.993	-123.067
SAMN05422231	PRJNA330082	Grassland	38.993	-123.067
SAMN05422231	PRJNA330082	Grassland	38.993	-123.067
SAMN05422231	PRJNA330082	Grassland	38.993	-123.067
SAMN05422231	PRJNA330082	Grassland	38.993	-123.067
SAMN05422225	PRJNA330069	Grassland	38.993	-123.067
SAMN05422225	PRJNA330069	Grassland	38.993	-123.067
SAMN05422225	PRJNA330069	Grassland	38.993	-123.067
SAMN05422225	PRJNA330069	Grassland	38.993	-123.067
SAMN05422225	PRJNA330069	Grassland	38.993	-123.067
SAMN05422225	PRJNA330069	Grassland	38.993	-123.067
SAMN05422225	PRJNA330069	Grassland	38.993	-123.067
SAMN05422225	PRJNA330069	Grassland	38.993	-123.067
SAMN05422225	PRJNA330069	Grassland	38.993	-123.067
SAMN05422225	PRJNA330069	Grassland	38.993	-123.067
SAMN05422225	PRJNA330069	Grassland	38.993	-123.067
SAMN05422225	PRJNA330069	Grassland	38.993	-123.067
SAMN05422225	PRJNA330069	Grassland	38.993	-123.067
SAMN05422154	PRJNA330111	Artificial Surfaces	39.53	-107.78
SAMN05422125	PRJNA330024	Artificial Surfaces	39.53	-107.78
SAMN05422134	PRJNA330012	Artificial Surfaces	39.53	-107.78
SAMN05422178	PRJNA330156	Artificial Surfaces	39.53	-107.78
SAMN05422135	PRJNA330011	Artificial Surfaces	39.53	-107.78
SAMN05421708	PRJNA330023	Artificial Surfaces	39.53	-107.78
SAMN05421557	PRJNA330110	Artificial Surfaces	39.53	-107.78
SAMN05422179	PRJNA330155	Artificial Surfaces	39.53	-107.78
SAMN05422155	PRJNA330109	Artificial Surfaces	39.53	-107.78
SAMN05422144	PRJNA330004	Forest	18	-65
SAMN05422161	PRJNA330108	Forest	18	-65
SAMN05421701	PRJNA330133	Forest	18	-65
SAMN05421912	PRJNA329998	Forest	18	-65
SAMN05422145	PRJNA330117	Forest	18	-65
SAMN05422227	PRJNA330114	Forest	18	-65
SAMN05422177	PRJNA330158	Forest	18	-65
SAMN05422176	PRJNA330159	Forest	18	-65
SAMN05422196	PRJNA330148	Forest	18	-65
SAMN05421897	PRJNA330147	Forest	18	-65
SAMN05422174	PRJNA330104	Forest	38.88	-120.64
SAMN05422184	PRJNA330074	Forest	38.88	-120.64
SAMN05422184	PRJNA330074	Forest	38.88	-120.64
SAMN05422119	PRJNA330132	Forest	18	-65
SAMN05422118	PRJNA330026	Forest	18	-65
SAMN05421917	PRJNA330072	Forest	38.88	-120.64
SAMN05422265	PRJNA330151	Forest	38.88	-120.64
SAMN05422265	PRJNA330151	Forest	38.88	-120.64
SAMN05422197	PRJNA330146	Forest	38.88	-120.64
SAMN05422197	PRJNA330146	Forest	38.88	-120.64
SAMN05421898	PRJNA330134	Forest	38.88	-120.64
SAMN05421695	PRJNA330092	Forest	38.88	-120.64
SAMN05421695	PRJNA330092	Forest	38.88	-120.64
SAMN05422126	PRJNA330021	Forest	38.88	-120.64
SAMN05422126	PRJNA330021	Forest	38.88	-120.64
SAMN05422198	PRJNA330144	Forest	39.2355	-121.284
SAMN05422199	PRJNA330143	Forest	39.2355	-121.284
SAMN05422199	PRJNA330143	Forest	39.2355	-121.284
SAMN05422068	PRJNA330053	Grassland	35.913	-79.056
SAMN05422124	PRJNA330025	Forest	44.2052	-122.128
SAMN05422157	PRJNA329994	Grassland	35.913	-79.056
SAMN05421702	PRJNA330142	Forest	44.2052	-122.128
SAMN05421698	PRJNA330124	Forest	44.2052	-122.128
SAMN05421560	PRJNA330121	Grassland	39.0709	-96.5828
SAMN05422132	PRJNA330123	Grassland	39.0709	-96.5828
SAMN05421900	PRJNA330101	Grassland	39.05	-99.1
SAMN05421558	PRJNA330115	Grassland	39.0709	-96.5828
SAMN05421559	PRJNA330116	Grassland	39.53	-96.5828
SAMN05421896	PRJNA330015	Grassland	39.0709	-96.5828
SAMN05422181	PRJNA330102	Grassland	39.05	-99.1
SAMN05422156	PRJNA329995	Grassland	39.05	-99.1
SAMN05422228	PRJNA330120	Grassland	39.05	-99.1
SAMN05422200	PRJNA330141	Grassland	39.05	-99.1
SAMN05421696	PRJNA330100	Grassland	39.05	-99.1
SAMN05422086	PRJNA330051	Grassland	40.8167	-104.767
SAMN05421709	PRJNA330048	Grassland	40.8167	-104.767
SAMN05422201	PRJNA330029	Grassland	40.8167	-104.767
SAMN05421704	PRJNA330157	Grassland	39.05	-99.1
SAMN05422103	PRJNA330047	Grassland	40.8167	-104.767
SAMN05422229	PRJNA330014	Grassland	39.05	-99.1
SAMN05422263	PRJNA330036	Grassland	40.8167	-104.767
SAMN05421710	PRJNA330052	Grassland	40.8167	-104.767
SAMN05421565	PRJNA330035	Grassland	40.8167	-104.767
SAMN05422096	PRJNA330050	Forest	46.42	-83.37
SAMN05422007	PRJNA330046	Forest	46.42	-83.37
SAMN05422040	PRJNA330037	Forest	46.42	-83.37
SAMN05421610	PRJNA330286	Tundra	71.2999	-156.61
SAMN05421609	PRJNA330283	Tundra	71.2999	-156.61
SAMN05422072	PRJNA330282	Tundra	71.2999	-156.61
SAMN05422058	PRJNA330290	Tundra	71.2999	-156.61
SAMN05422254	PRJNA330287	Tundra	71.2999	-156.61
SAMN05422057	PRJNA330291	Tundra	71.2999	-156.61
SAMN05421916	PRJNA330294	Tundra	71.2999	-156.61
SAMN05421613	PRJNA330295	Tundra	71.2999	-156.61
SAMN05421614	PRJNA330303	Tundra	71.2999	-156.61
SAMN05422048	PRJNA330304	Tundra	71.2999	-156.61
SAMN05422045	PRJNA330308	Tundra	71.2999	-156.61
SAMN05422046	PRJNA330307	Tundra	71.2999	-156.61
SAMN05422044	PRJNA330310	Tundra	71.2999	-156.61
SAMN05422043	PRJNA330311	Tundra	71.2999	-156.61
SAMN05422041	PRJNA330313	Tundra	71.2999	-156.61
SAMN05422042	PRJNA330312	Tundra	71.2999	-156.61
SAMN05422239	PRJNA330277	Tundra	71.2999	-156.61
SAMN05422088	PRJNA330278	Tundra	71.2999	-156.61
SAMN05422071	PRJNA330284	Tundra	71.2999	-156.61
SAMN05421586	PRJNA330281	Tundra	71.2999	-156.61
SAMN05422087	PRJNA330279	Tundra	71.2999	-156.61
SAMN05422080	PRJNA330280	Tundra	71.2999	-156.61
SAMN05422069	PRJNA330288	Tundra	71.2999	-156.61
SAMN05422059	PRJNA330289	Tundra	71.2999	-156.61
SAMN05422070	PRJNA330285	Tundra	71.2999	-156.61
SAMN05421611	PRJNA330292	Tundra	71.2999	-156.61
SAMN05422056	PRJNA330293	Tundra	71.2999	-156.61
SAMN05422240	PRJNA330297	Tundra	71.2999	-156.61
SAMN05422049	PRJNA330302	Tundra	71.2999	-156.61
SAMN05422054	PRJNA330298	Tundra	71.2999	-156.61
SAMN05421909	PRJNA330301	Tundra	71.2999	-156.61
SAMN05422055	PRJNA330296	Tundra	71.2999	-156.61
SAMN05422250	PRJNA330305	Tundra	71.2999	-156.61
SAMN05422047	PRJNA330306	Tundra	71.2999	-156.61
SAMN05421995	PRJNA330362	Wetland	71.3	-156.61
SAMN05421623	PRJNA330361	Agricultural Land	42.39	-85.37
SAMN05421623	PRJNA330361	Agricultural Land	42.39	-85.37
SAMN05421623	PRJNA330361	Agricultural Land	42.39	-85.37
SAMN05421623	PRJNA330361	Agricultural Land	42.39	-85.37
SAMN05422024	PRJNA330274	Grassland	43.3	-89.38
SAMN05421608	PRJNA330275	Artificial Surfaces	43.3	-89.38
SAMN05422025	PRJNA330273	Artificial Surfaces	43.3	-89.38
SAMN05422023	PRJNA330276	Artificial Surfaces	43.3	-89.38
SAMN05421591	PRJNA330182	Artificial Surfaces	43.3	-89.38
SAMN05421592	PRJNA330184	Artificial Surfaces	43.3	-89.38
SAMN05421570	PRJNA330197	Artificial Surfaces	43.3	-89.38
SAMN05422014	PRJNA330188	Artificial Surfaces	43.3	-89.38
SAMN05422015	PRJNA330185	Artificial Surfaces	43.3	-89.38
SAMN05422243	PRJNA330187	Artificial Surfaces	43.3	-89.38
SAMN05421891	PRJNA330195	Artificial Surfaces	43.3	-89.38
SAMN05421576	PRJNA330186	Artificial Surfaces	43.3	-89.38
SAMN05422006	PRJNA330199	Artificial Surfaces	43.3	-89.38
SAMN05421571	PRJNA330200	Artificial Surfaces	43.3	-89.38
SAMN05422005	PRJNA330201	Grassland	43.3	-89.38
SAMN05421573	PRJNA330205	Artificial Surfaces	43.3	-89.38
SAMN05421572	PRJNA330202	Grassland	43.3	-89.38
SAMN05422003	PRJNA330204	Artificial Surfaces	43.3	-89.38
SAMN05422004	PRJNA330203	Grassland	43.3	-89.38
SAMN05422037	PRJNA330055	Tundra	71.2905	-156.789
SAMN05422033	PRJNA330063	Tundra	71.2838	-156.599
SAMN05422267	PRJNA330163	Tundra	71.2709	-156.81
SAMN05422028	PRJNA330166	Tundra	71.2709	-156.81
SAMN05422026	PRJNA330169	Tundra	71.2909	-156.788
SAMN05421616	PRJNA330321	Artificial Surfaces	39.53	-107.78
SAMN05421993	PRJNA330323	Artificial Surfaces	39.53	-107.78
SAMN05421994	PRJNA330322	Artificial Surfaces	39.53	-107.78
SAMN05421705	PRJNA330010	Artificial Surfaces	39.53	-107.78
SAMN05421892	PRJNA330022	Artificial Surfaces	39.53	-107.78
SAMN05422182	PRJNA330099	Artificial Surfaces	39.53	-107.78
SAMN05421617	PRJNA330324	Artificial Surfaces	39.53	-107.78
SAMN05421978	PRJNA330349	Artificial Surfaces	39.5348	-107.783
SAMN05422002	PRJNA330206	Artificial Surfaces	39.5348	-107.783
SAMN05421989	PRJNA330330	Artificial Surfaces	39.53	-107.78
SAMN05421985	PRJNA330337	Artificial Surfaces	39.5348	-107.783
SAMN05422001	PRJNA330207	Artificial Surfaces	39.5348	-107.783
SAMN05421588	PRJNA330338	Artificial Surfaces	39.5348	-107.783
SAMN05422269	PRJNA330329	Artificial Surfaces	39.53	-107.78
SAMN05421649	PRJNA329926	Grassland	39.7182	-123.653
SAMN05421922	PRJNA329927	Grassland	39.7182	-123.653
SAMN05421922	PRJNA329927	Grassland	39.7182	-123.653
SAMN05421921	PRJNA329928	Grassland	39.7182	-123.653
SAMN05421524	PRJNA329929	Grassland	39.7182	-123.653
SAMN05421956	PRJNA329935	Artificial Surfaces	43.3	-89.38
SAMN05421526	PRJNA329934	Artificial Surfaces	43.3	-89.38
SAMN05421954	PRJNA329937	Artificial Surfaces	43.3	-89.38
SAMN05421948	PRJNA329948	Artificial Surfaces	43.3	-89.38
SAMN05421530	PRJNA329949	Artificial Surfaces	43.3	-89.38
SAMN05421949	PRJNA329946	Artificial Surfaces	43.3	-89.38
SAMN05421529	PRJNA329947	Artificial Surfaces	43.3	-89.38
SAMN05421920	PRJNA329930	Grassland	39.7182	-123.653
SAMN05421531	PRJNA329952	Agricultural Land	39.72	-123.65
SAMN05421944	PRJNA329958	Artificial Surfaces	43.3	-89.38
SAMN05421931	PRJNA329984	Artificial Surfaces	43.3	-89.38
SAMN05421535	PRJNA329963	Agricultural Land	43.3	-89.38
SAMN05422258	PRJNA329961	Artificial Surfaces	43.3	-89.38
SAMN05421534	PRJNA329960	Artificial Surfaces	43.3	-89.38
SAMN05421932	PRJNA329982	Agricultural Land	43.3	-89.38
SAMN05421942	PRJNA329962	Agricultural Land	43.3	-89.38
SAMN05421653	PRJNA329977	Artificial Surfaces	43.3	-89.38
SAMN05421661	PRJNA329981	Artificial Surfaces	43.3	-89.38
SAMN05421930	PRJNA330369	Agricultural Land	43.3	-89.38
SAMN05421937	PRJNA329972	Artificial Surfaces	43.3	-89.38
SAMN05421939	PRJNA329970	Grassland	43.3	-89.38
SAMN05421633	PRJNA330370	Grassland	43.3	-89.38
SAMN05421634	PRJNA330372	Agricultural Land	43.3	-89.38
SAMN05421929	PRJNA330371	Artificial Surfaces	43.3	-89.38
SAMN05421928	PRJNA330373	Grassland	43.3	-89.38
SAMN05421927	PRJNA330374	Grassland	43.3	-89.38
SAMN05421645	PRJNA330375	Grassland	43.3	-89.38
SAMN05422260	PRJNA330380	Artificial Surfaces	43.3	-89.38
SAMN05421646	PRJNA330378	Grassland	43.3	-89.38
SAMN05421926	PRJNA330377	Grassland	43.3	-89.38
SAMN05421925	PRJNA330379	Grassland	43.3	-89.38
SAMN05421658	PRJNA330389	Grassland	43.3	-89.38
SAMN05422272	PRJNA330395	Grassland	43.3	-89.38
SAMN05422223	PRJNA330396	Grassland	43.3	-89.38
SAMN05422224	PRJNA330388	Artificial Surfaces	43.3	-89.38
SAMN05421656	PRJNA330386	Agricultural Land	43.3	-89.38
SAMN05422214	PRJNA330414	Artificial Surfaces	42.4	-85.37
SAMN05421657	PRJNA330387	Grassland	43.3	-89.38
SAMN05421624	PRJNA330397	Artificial Surfaces	43.3	-89.38
SAMN05422222	PRJNA330398	Agricultural Land	43.3	-89.38
SAMN05422249	PRJNA330384	Artificial Surfaces	43.3	-89.38
SAMN05422218	PRJNA330406	Artificial Surfaces	42.4	-85.37
SAMN05422219	PRJNA330403	Grassland	42.4	-85.37
SAMN05421498	PRJNA330402	Artificial Surfaces	42.4	-85.37
SAMN05422257	PRJNA330404	Grassland	42.4	-85.37
SAMN05421500	PRJNA330415	Artificial Surfaces	42.4	-85.37
SAMN05422259	PRJNA330405	Artificial Surfaces	42.4	-85.37
SAMN05421628	PRJNA330418	Grassland	42.4	-85.37
SAMN05422213	PRJNA330417	Artificial Surfaces	42.4	-85.37
SAMN05422217	PRJNA330407	Artificial Surfaces	42.4	-85.37
SAMN05421905	PRJNA330411	Grassland	42.4	-85.37
SAMN05428636	PRJNA330422	Grassland	43.56	-89.32
SAMN05422210	PRJNA330427	Grassland	43.42	89.4
SAMN05422256	PRJNA330430	Grassland	43.42	89.4
SAMN05428646	PRJNA330428	Grassland	43.42	-89.4
SAMN05422244	PRJNA330432	Grassland	43.42	89.33
SAMN05422203	PRJNA330436	Agricultural Land	43.3	-89.38
SAMN05428645	PRJNA330433	Grassland	43.42	-89.33
SAMN05422202	PRJNA330438	Agricultural Land	43.42	89.32
SAMN05421986	PRJNA330336	Artificial Surfaces	39.5348	-107.783
SAMN05421618	PRJNA330328	Artificial Surfaces	39.53	-107.78
SAMN05421887	PRJNA330333	Artificial Surfaces	39.5348	-107.783
SAMN05421619	PRJNA330331	Artificial Surfaces	39.53	-107.78
SAMN05421992	PRJNA330325	Artificial Surfaces	39.53	-107.78
SAMN05421990	PRJNA330327	Artificial Surfaces	39.5348	-107.783
SAMN05421988	PRJNA330332	Artificial Surfaces	39.5348	-107.783
SAMN05421991	PRJNA330326	Artificial Surfaces	39.5348	-107.783
SAMN00736155	NA	Grassland	39.53	-107.78
SAMN05518308	PRJNA336383	Forest	42.5504	-72.1802
SAMN05518402	PRJNA336409	Forest	42.4711	-72.1726
SAMN05518693	PRJNA336410	Forest	42.4711	-72.1726
SAMN05518324	PRJNA336389	Forest	42.533	-72.2095
SAMN05518696	PRJNA336388	Forest	42.533	-72.2095
SAMN05518482	PRJNA336415	Forest	42.5504	-72.1802
SAMN05518318	PRJNA336403	Forest	42.4711	-72.1726
SAMN05518320	PRJNA336397	Forest	42.533	-72.2095
SAMN05518325	PRJNA336387	Forest	42.533	-72.2095
SAMN05518321	PRJNA336396	Forest	42.533	-72.2095
SAMN05518699	PRJNA336327	Forest	42.533	-72.2095
SAMN05518689	PRJNA336398	Forest	42.533	-72.2095
SAMN05518413	PRJNA336386	Forest	42.533	-72.1802
SAMN05518686	PRJNA336390	Forest	42.533	-72.2095
SAMN05518323	PRJNA336391	Forest	42.533	-72.2095
SAMN05518479	PRJNA336404	Forest	42.4711	-72.1726
SAMN05518692	PRJNA336408	Forest	42.4711	-72.1726
SAMN05518478	PRJNA336429	Forest	42.533	-72.2095
SAMN05518688	PRJNA336395	Forest	42.533	-72.2095
SAMN05518687	PRJNA336392	Forest	42.533	-72.2095
SAMN05518056	PRJNA336399	Forest	42.4711	-72.1726
SAMN05518691	PRJNA336402	Forest	42.4711	-72.1726
SAMN05518397	PRJNA336428	Forest	42.533	-72.2095
SAMN05518480	PRJNA336406	Forest	42.4711	-72.1726
SAMN05518055	PRJNA336393	Forest	42.533	-72.2095
SAMN05518690	PRJNA336400	Forest	42.4711	-72.1726
SAMN05518316	PRJNA336407	Forest	42.533	-72.1726
SAMN05518319	PRJNA336401	Forest	42.4711	-72.1726
SAMN05518481	PRJNA336413	Forest	42.4711	-72.1726
SAMN05518697	PRJNA336411	Forest	42.4711	-72.1726
SAMN05518313	PRJNA336416	Forest	42.5504	-72.1802
SAMN05518483	PRJNA336417	Forest	42.5504	-72.1802
SAMN05518314	PRJNA336414	Forest	42.533	-72.2095
SAMN05518310	PRJNA336424	Forest	42.5504	-72.1802
SAMN05518698	PRJNA336384	Forest	42.5504	-72.1802
SAMN05518493	PRJNA336423	Forest	42.5504	-72.1802
SAMN05518694	PRJNA336421	Forest	42.5504	-72.1802
SAMN05518412	PRJNA336426	Forest	42.5504	-72.1802
SAMN05518504	PRJNA336425	Forest	42.5504	-72.1802
SAMN05518312	PRJNA336420	Forest	42.5504	-72.1802
SAMN05518695	PRJNA336427	Forest	42.5504	-72.1802
SAMN05518311	PRJNA336422	Forest	42.5504	-72.1802
SAMN05518082	PRJNA337737	Agricultural Land	43.3033	-89.3325
SAMN05518082	PRJNA337737	Agricultural Land	43.3033	-89.3325
SAMN05518082	PRJNA337737	Agricultural Land	43.3033	-89.3325
SAMN05518082	PRJNA337737	Agricultural Land	43.3033	-89.3325
SAMN05518082	PRJNA337737	Agricultural Land	43.3033	-89.3325
SAMN05518036	PRJNA337680	Grassland	43.3122	-89.3708
SAMN05518036	PRJNA337680	Grassland	43.3122	-89.3708
SAMN05518036	PRJNA337680	Grassland	43.3122	-89.3708
SAMN05518036	PRJNA337680	Grassland	43.3122	-89.3708
SAMN05518036	PRJNA337680	Grassland	43.3122	-89.3708
SAMN05518036	PRJNA337680	Grassland	43.3122	-89.3708
SAMN05518036	PRJNA337680	Grassland	43.3122	-89.3708
SAMN05518036	PRJNA337680	Grassland	43.3122	-89.3708
SAMN05518036	PRJNA337680	Grassland	43.3122	-89.3708
SAMN05518036	PRJNA337680	Grassland	43.3122	-89.3708
SAMN05518036	PRJNA337680	Grassland	43.3122	-89.3708
SAMN05518036	PRJNA337680	Grassland	43.3122	-89.3708
SAMN05518036	PRJNA337680	Grassland	43.3122	-89.3708
SAMN05518036	PRJNA337680	Grassland	43.3122	-89.3708
SAMN05518036	PRJNA337680	Grassland	43.3122	-89.3708
SAMN05518036	PRJNA337680	Grassland	43.3122	-89.3708
SAMN05518036	PRJNA337680	Grassland	43.3122	-89.3708
SAMN05518036	PRJNA337680	Grassland	43.3122	-89.3708
SAMN05518500	PRJNA336855	Agricultural Land	39.0043	-77.1012
SAMN05518500	PRJNA336855	Agricultural Land	39.0043	-77.1012
SAMN05518500	PRJNA336855	Agricultural Land	39.0043	-77.1012
SAMN05518500	PRJNA336855	Agricultural Land	39.0043	-77.1012
SAMN05518500	PRJNA336855	Agricultural Land	39.0043	-77.1012
SAMN05518500	PRJNA336855	Agricultural Land	39.0043	-77.1012
SAMN05518500	PRJNA336855	Agricultural Land	39.0043	-77.1012
SAMN05518500	PRJNA336855	Agricultural Land	39.0043	-77.1012
SAMN05518500	PRJNA336855	Agricultural Land	39.0043	-77.1012
SAMN05518500	PRJNA336855	Agricultural Land	39.0043	-77.1012
SAMN05518500	PRJNA336855	Agricultural Land	39.0043	-77.1012
SAMN05518500	PRJNA336855	Agricultural Land	39.0043	-77.1012
SAMN05518500	PRJNA336855	Agricultural Land	39.0043	-77.1012
SAMN05518500	PRJNA336855	Agricultural Land	39.0043	-77.1012
SAMN05518500	PRJNA336855	Grassland	39.0043	-77.1012
SAMN05518500	PRJNA336855	Grassland	39.0043	-77.1012
SAMN05518500	PRJNA336855	Grassland	39.0043	-77.1012
SAMN05518500	PRJNA336855	Grassland	39.0043	-77.1012
SAMN05518500	PRJNA336855	Grassland	39.0043	-77.1012
SAMN05518500	PRJNA336855	Grassland	39.0043	-77.1012
SAMN05518500	PRJNA336855	Grassland	39.0043	-77.1012
SAMN05518500	PRJNA336855	Grassland	39.0043	-77.1012
SAMN05518500	PRJNA336855	Grassland	39.0043	-77.1012
SAMN05421554	PRJNA330071	Artificial Surfaces	39.55	-107.97
SAMN05421554	PRJNA330071	Artificial Surfaces	39.55	-107.97
SAMN05421554	PRJNA330071	Artificial Surfaces	39.55	-107.97
SAMN05422193	PRJNA330098	Artificial Surfaces	39.55	-107.97
SAMN05422105	PRJNA330070	Artificial Surfaces	39.55	-107.97
SAMN05422197	PRJNA330146	Forest	38.88	-120.64
SAMN05422231	PRJNA330082	Grassland	38.993	-123.067
SAMN05422231	PRJNA330082	Grassland	38.993	-123.067
SAMN05422225	PRJNA330069	Grassland	38.993	-123.067
SAMN05751211	PRJNA342239	Grassland	43.44	-92.38
SAMN05767920	PRJNA343121	Forest	45.68	-72
SAMN05767921	PRJNA343121	Forest	45.68	-72
SAMN05767922	PRJNA343121	Forest	45.68	-72
SAMN05767923	PRJNA343121	Forest	45.68	-72
SAMN05767924	PRJNA343121	Forest	45.68	-72
SAMN05786375	PRJNA343355	Forest	36.04	108.32
SAMN05786376	PRJNA343355	Forest	36.04	108.32
SAMN05786378	PRJNA343355	Forest	36.02	108.31
SAMN05786379	PRJNA343355	Forest	36.02	108.31
SAMN05786380	PRJNA343355	Forest	36.02	108.31
SAMN05786381	PRJNA343355	Forest	36.02	108.32
SAMN05786382	PRJNA343355	Forest	36.02	108.32
SAMN05786383	PRJNA343355	Forest	36.02	108.32
SAMN05991020	PRJNA352707	Forest	50.8	8.812
SAMN06114544	PRJNA356667	Agricultural Land	45.41	126.45
SAMN06114544	PRJNA356667	Agricultural Land	45.41	126.45
SAMN06114544	PRJNA356667	Agricultural Land	45.41	126.45
SAMN06092822	PRJNA356321	Agricultural Land	23.6193	116.872
SAMN06092823	PRJNA356321	Agricultural Land	23.621	116.872
SAMN06114544	PRJNA360469	Agricultural Land	45.41	126.45
SAMN06114544	PRJNA360469	Agricultural Land	45.41	126.45
SAMN06114544	PRJNA360469	Agricultural Land	45.41	126.45
SAMN06114544	PRJNA360469	Agricultural Land	45.41	126.45
SAMN06092825	PRJNA356321	Agricultural Land	23.6229	116.815
SAMN06092824	PRJNA356321	Agricultural Land	23.6246	116.812
SAMN06239031	PRJNA362455	Agricultural Land	26.17	-97.96
SAMN06239030	PRJNA362455	Agricultural Land	26.17	-97.96
SAMN06239029	PRJNA362455	Agricultural Land	28.11	-81.71
SAMN06239028	PRJNA362455	Agricultural Land	28.11	-81.71
SAMN06239027	PRJNA362455	Agricultural Land	33.89	-117.42
SAMN06239026	PRJNA362455	Agricultural Land	33.89	-117.42
SAMN06239025	PRJNA362455	Agricultural Land	39.58	-0.36
SAMN06239023	PRJNA362455	Agricultural Land	37.51	-5.81
SAMN06239022	PRJNA362455	Agricultural Land	37.51	-5.81
SAMN06239021	PRJNA362455	Agricultural Land	-25.44	30.99
SAMN06239020	PRJNA362455	Agricultural Land	-25.77	27.61
SAMN06239019	PRJNA362455	Agricultural Land	-24.36	30.72
SAMN06239018	PRJNA362455	Agricultural Land	37.49	14.81
SAMN06239016	PRJNA362455	Agricultural Land	37.28	14.88
SAMN06239014	PRJNA362455	Agricultural Land	38.28	16.24
SAMN06239013	PRJNA362455	Agricultural Land	38.28	16.24
SAMN06239011	PRJNA362455	Agricultural Land	-21.35	55.57
SAMN06239010	PRJNA362455	Agricultural Land	-21.34	55.56
SAMN06239008	PRJNA362455	Agricultural Land	-21.2	55.53
SAMN06239006	PRJNA362455	Agricultural Land	25.46	114.52
SAMN06239005	PRJNA362455	Agricultural Land	25.46	114.52
SAMN06239004	PRJNA362455	Agricultural Land	23.07	108.18
SAMN06239002	PRJNA362455	Agricultural Land	23.64	112.82
SAMN06239001	PRJNA362455	Agricultural Land	23.64	112.82
SAMN06239000	PRJNA362455	Agricultural Land	-26.2407	-54.1546
SAMN06238999	PRJNA362455	Agricultural Land	-26.2407	-54.1546
SAMN06238998	PRJNA362455	Agricultural Land	-26.2407	-54.1546
SAMN06238997	PRJNA362455	Agricultural Land	-26.2407	-54.1546
SAMN06238996	PRJNA362455	Agricultural Land	-26.2407	-54.1546
SAMN06238995	PRJNA362455	Agricultural Land	-26.2407	-54.1546
SAMN06238994	PRJNA362455	Agricultural Land	-25.59	151.3
SAMN06238993	PRJNA362455	Agricultural Land	-25.59	151.3
SAMN06238992	PRJNA362455	Agricultural Land	-37.17	146.22
SAMN06238991	PRJNA362455	Agricultural Land	-37.17	146.22
SAMN06238990	PRJNA362455	Agricultural Land	-34.18	142.15
SAMN06238989	PRJNA362455	Agricultural Land	-34.18	142.15
SAMN06266446	PRJNA365672	Grassland	39.7392	-123.631
SAMN06266446	PRJNA365672	Grassland	39.7392	-123.631
SAMN06266388	PRJNA365692	Grassland	39.7392	-123.631
SAMN06266477	PRJNA365693	Grassland	39.7392	-123.631
SAMN06266478	PRJNA365695	Grassland	39.7392	-123.631
SAMN06264649	PRJNA365694	Grassland	39.7392	-123.631
SAMN06266479	PRJNA365696	Grassland	39.7392	-123.631
SAMN06266454	PRJNA365697	Grassland	39.7392	-123.631
SAMN06266481	PRJNA365700	Grassland	39.7392	-123.631
SAMN06266455	PRJNA365698	Grassland	39.7392	-123.631
SAMN06264648	PRJNA365699	Grassland	39.7392	-123.631
SAMN06264883	PRJNA365701	Grassland	39.7392	-123.631
SAMN06264634	PRJNA365704	Grassland	39.7392	-123.631
SAMN06266336	PRJNA365705	Grassland	39.7392	-123.631
SAMN06266482	PRJNA365706	Grassland	39.7392	-123.631
SAMN06264633	PRJNA365709	Grassland	39.7392	-123.631
SAMN06266492	PRJNA365887	Artificial Surfaces	45.54	-73.72
SAMN06266483	PRJNA365711	Grassland	39.7392	-123.631
SAMN06266425	PRJNA365888	Artificial Surfaces	45.54	-73.72
SAMN06266329	PRJNA365889	Agricultural Land	45.54	-73.72
SAMN06267591	PRJNA367030	Artificial Surfaces	45.54	-73.72
SAMN06266462	PRJNA365890	Agricultural Land	45.54	-73.72
SAMN06267599	PRJNA367038	Artificial Surfaces	45.54	-73.72
SAMN06267597	PRJNA367036	Artificial Surfaces	45.54	-73.72
SAMN06267592	PRJNA367031	Artificial Surfaces	45.54	-73.72
SAMN06267600	PRJNA367039	Artificial Surfaces	45.54	-73.72
SAMN06267598	PRJNA367037	Artificial Surfaces	45.54	-73.72
SAMN06267596	PRJNA367035	Artificial Surfaces	45.54	-73.72
SAMN06267593	PRJNA367032	Artificial Surfaces	45.54	-73.72
SAMN06267601	PRJNA367040	Artificial Surfaces	45.54	-73.72
SAMN06267602	PRJNA367041	Artificial Surfaces	45.54	-73.72
SAMN06267603	PRJNA367042	Agricultural Land	45.54	-73.72
SAMN06264539	PRJNA365560	Wetland	51.62	-128.09
SAMN06266323	PRJNA365562	Wetland	51.62	-128.09
SAMN05357642	PRJNA327808	Agricultural Land	42.98	-81.24
SAMN05357641	PRJNA327808	Agricultural Land	42.98	-81.24
SAMN05357640	PRJNA327808	Agricultural Land	42.98	-81.24
SAMN05357639	PRJNA327808	Agricultural Land	42.98	-81.24
SAMN05357638	PRJNA327808	Agricultural Land	42.98	-81.24
SAMN05357636	PRJNA327808	Agricultural Land	42.98	-81.24
SAMN05357635	PRJNA327808	Agricultural Land	42.98	-81.24
SAMN05357634	PRJNA327808	Agricultural Land	42.98	-81.24
SAMN05357633	PRJNA327808	Agricultural Land	42.98	-81.24
SAMN05357632	PRJNA327808	Agricultural Land	42.98	-81.24
SAMN06264492	PRJNA365333	Wetland	37.4968	-122.133
SAMN06265041	PRJNA365331	Wetland	37.4969	-122.133
SAMN06266236	PRJNA365332	Wetland	37.4969	-122.133
SAMN06266229	PRJNA365339	Wetland	37.4961	-122.133
SAMN06264691	PRJNA365334	Wetland	37.4968	-122.133
SAMN06266230	PRJNA365340	Wetland	37.4965	-122.133
SAMN06266272	PRJNA365342	Wetland	37.4958	-122.133
SAMN06265055	PRJNA365354	Wetland	37.496	-122.133
SAMN06264490	PRJNA365343	Wetland	37.4958	-122.133
SAMN06265038	PRJNA365351	Wetland	37.4962	-122.133
SAMN06266277	PRJNA365355	Wetland	37.4965	-122.133
SAMN06266280	PRJNA365361	Wetland	37.4971	-122.129
SAMN06264687	PRJNA365362	Wetland	37.4972	-122.129
SAMN06266278	PRJNA365356	Wetland	37.4965	-122.133
SAMN06267083	PRJNA367560	Grassland	39.7181	-123.653
SAMN06267082	PRJNA367559	Grassland	39.7181	-123.653
SAMN06267079	PRJNA367556	Grassland	39.7181	-123.653
SAMN06267081	PRJNA367558	Grassland	39.7181	-123.653
SAMN06267080	PRJNA367557	Grassland	39.7181	-123.653
SAMN06267084	PRJNA367561	Grassland	39.7181	-123.653
SAMN06267086	PRJNA367563	Grassland	39.7181	-123.653
SAMN06267094	PRJNA367571	Grassland	39.7181	-123.653
SAMN06267087	PRJNA367564	Grassland	39.7181	-123.653
SAMN06267101	PRJNA367578	Grassland	39.7181	-123.653
SAMN06267098	PRJNA367575	Grassland	39.7181	-123.653
SAMN06267100	PRJNA367577	Grassland	39.7181	-123.653
SAMN06267096	PRJNA367573	Grassland	39.7181	-123.653
SAMN05384376	PRJNA421255	Artificial Surfaces	50.1319	11.881
SAMN05384411	PRJNA421255	Artificial Surfaces	50.1319	11.881
SAMN06265139	PRJNA364854	Grassland	38.8693	-122.428
SAMN06265914	PRJNA364853	Grassland	38.8693	-122.428
SAMN06265006	PRJNA364855	Grassland	38.8692	-122.428
SAMN06266023	PRJNA364857	Grassland	38.8708	-122.427
SAMN06266024	PRJNA364858	Grassland	38.8707	-122.427
SAMN06264646	PRJNA364860	Grassland	38.8712	-122.428
SAMN06266025	PRJNA364864	Grassland	38.8724	-122.427
SAMN06265005	PRJNA364863	Grassland	38.8723	-122.427
SAMN06265917	PRJNA364862	Grassland	38.8722	-122.427
SAMN06266035	PRJNA364906	Forest	9.1086	-79.8436
SAMN06265035	PRJNA364910	Forest	9.1086	-79.8436
SAMN06265931	PRJNA364909	Forest	9.1086	-79.8436
SAMN06266036	PRJNA364908	Forest	9.1086	-79.8436
SAMN06265935	PRJNA364914	Forest	9.1086	-79.8436
SAMN06264822	PRJNA364913	Forest	9.1086	-79.8436
SAMN06265934	PRJNA364912	Forest	9.1086	-79.8436
SAMN06266042	PRJNA364911	Forest	9.1086	-79.8436
SAMN06265936	PRJNA364915	Forest	9.1086	-79.8436
SAMN06266037	PRJNA364917	Forest	9.1086	-79.8436
SAMN06264378	PRJNA364916	Forest	9.1086	-79.8436
SAMN06266038	PRJNA365070	Forest	9.1086	-79.8436
SAMN06264377	PRJNA364918	Forest	9.1086	-79.8436
SAMN06267103	PRJNA367580	Grassland	39.7181	-123.653
SAMN06267104	PRJNA367581	Grassland	39.7181	-123.653
SAMN06265748	PRJNA364547	Forest	39.7291	-123.642
SAMN06265747	PRJNA364549	Forest	39.7291	-123.642
SAMN06265762	PRJNA364548	Forest	39.7291	-123.642
SAMN06309433	PRJNA371523	Forest	-25.56	29.56
SAMN06309432	PRJNA371523	Forest	-26.8	29.46
SAMN06309431	PRJNA371523	Forest	-25.54	28.3
SAMN06309430	PRJNA371523	Forest	-25.56	29.56
SAMN06309429	PRJNA371523	Forest	-29.22	30.1
SAMN06309427	PRJNA371523	Forest	-25.56	29.56
SAMN06309426	PRJNA371523	Forest	-25.55	28.29
SAMN06268690	PRJNA366302	Forest	31.11	-95.15
SAMN06268690	PRJNA366302	Forest	31.11	-95.15
SAMN06268166	PRJNA365977	Grassland	39.7383	-123.63
SAMN06268167	PRJNA365978	Grassland	39.7383	-123.63
SAMN06268168	PRJNA365979	Grassland	39.7383	-123.63
SAMN06268169	PRJNA365980	Grassland	39.7383	-123.63
SAMN06268170	PRJNA365981	Grassland	39.7383	-123.63
SAMN06268058	PRJNA366010	Grassland	39.7392	-123.631
SAMN06268059	PRJNA366011	Grassland	39.7392	-123.631
SAMN06268061	PRJNA366013	Grassland	39.7392	-123.631
SAMN06268062	PRJNA366014	Grassland	39.7392	-123.631
SAMN06297432	PRJNA370742	Agricultural Land	38.1087	-121.653
SAMN06268060	PRJNA366012	Grassland	39.7392	-123.631
SAMN06268063	PRJNA366015	Grassland	39.7392	-123.631
SAMN06339526	PRJNA374886	Forest	9.1086	-79.8436
SAMN06339526	PRJNA374886	Forest	9.1086	-79.8436
SAMN06339526	PRJNA374886	Forest	9.1086	-79.8436
SAMN06339525	PRJNA374886	Forest	9.1086	-79.8436
SAMN06339525	PRJNA374886	Forest	9.1086	-79.8436
SAMN06339525	PRJNA374886	Forest	9.1086	-79.8436
SAMN06339524	PRJNA374886	Forest	9.1086	-79.8436
SAMN06339523	PRJNA374886	Forest	9.1086	-79.8436
SAMN06339523	PRJNA374886	Forest	9.1086	-79.8436
SAMN06267841	PRJNA365844	Wetland	51.62	-128.09
SAMN06267843	PRJNA365846	Wetland	51.62	-128.09
SAMN06267842	PRJNA365845	Wetland	51.62	-128.09
SAMN06267844	PRJNA365847	Wetland	51.62	-128.09
SAMN06267847	PRJNA365850	Wetland	51.62	-128.09
SAMN06267845	PRJNA365848	Wetland	51.62	-128.09
SAMN06267846	PRJNA365849	Wetland	51.62	-128.09
SAMN06267848	PRJNA365851	Wetland	51.62	-128.09
SAMN06267849	PRJNA365852	Wetland	51.62	-128.09
SAMN06267851	PRJNA365729	Wetland	51.62	-128.09
SAMN06267850	PRJNA365853	Wetland	51.62	-128.09
SAMN06267787	PRJNA367009	Artificial Surfaces	43.3	-89.38
SAMN06267789	PRJNA367011	Artificial Surfaces	43.3	-89.38
SAMN06267788	PRJNA367010	Grassland	43.3	-89.38
SAMN06267791	PRJNA367013	Grassland	43.3	-89.38
SAMN06267794	PRJNA367016	Artificial Surfaces	43.3	-89.38
SAMN06267795	PRJNA367017	Artificial Surfaces	43.3	-89.38
SAMN06267798	PRJNA367020	Artificial Surfaces	43.3	-89.38
SAMN06267800	PRJNA367022	Artificial Surfaces	43.3	-89.38
SAMN06267799	PRJNA367021	Grassland	43.3	-89.38
SAMN06267801	PRJNA367023	Artificial Surfaces	43.3	-89.38
SAMN06267802	PRJNA367024	Artificial Surfaces	43.3	-89.38
SAMN06267803	PRJNA367025	Artificial Surfaces	43.3	-89.38
SAMN06267804	PRJNA367026	Artificial Surfaces	43.3	-89.38
SAMN06267805	PRJNA367027	Grassland	43.3	-89.38
SAMN06267806	PRJNA367028	Grassland	43.3	-89.38
SAMN06267808	PRJNA365811	Artificial Surfaces	43.3	-89.38
SAMN06267809	PRJNA365812	Artificial Surfaces	43.3	-89.38
SAMN06267810	PRJNA365813	Artificial Surfaces	43.3	-89.38
SAMN06267812	PRJNA365815	Grassland	43.3	-89.38
SAMN06267813	PRJNA365816	Artificial Surfaces	43.3	-89.38
SAMN06267814	PRJNA365817	Artificial Surfaces	43.3	-89.38
SAMN06267817	PRJNA365820	Grassland	43.3	-89.38
SAMN06267818	PRJNA365821	Agricultural Land	51.62	-128.09
SAMN06267819	PRJNA365822	Artificial Surfaces	43.3	-89.38
SAMN06267821	PRJNA365824	Artificial Surfaces	43.3	-89.38
SAMN06267822	PRJNA365825	Artificial Surfaces	43.3	-89.38
SAMN06267824	PRJNA365827	Grassland	43.3	-89.38
SAMN06267827	PRJNA365830	Agricultural Land	43.3	-89.38
SAMN06267826	PRJNA365829	Artificial Surfaces	43.3	-89.38
SAMN06267829	PRJNA365832	Artificial Surfaces	43.3	-89.38
SAMN06267828	PRJNA365831	Artificial Surfaces	43.3	-89.38
SAMN06267830	PRJNA365833	Artificial Surfaces	43.3	-89.38
SAMN06267832	PRJNA365835	Artificial Surfaces	43.3	-89.38
SAMN06267834	PRJNA365837	Grassland	43.3	-89.38
SAMN06267835	PRJNA365838	Grassland	43.3	-89.38
SAMN06267837	PRJNA365840	Artificial Surfaces	43.3	-89.38
SAMN06267838	PRJNA365841	Artificial Surfaces	43.3	-89.38
SAMN06267852	PRJNA365730	Wetland	51.62	-128.09
SAMN06264650	PRJNA365674	Grassland	39.7392	-123.631
SAMN06266423	PRJNA365673	Grassland	39.7392	-123.631
SAMN06266447	PRJNA365675	Grassland	39.7392	-123.631
SAMN06266474	PRJNA365677	Grassland	39.7392	-123.631
SAMN06266448	PRJNA365679	Grassland	39.7392	-123.631
SAMN06266449	PRJNA365680	Grassland	39.7392	-123.631
SAMN06266450	PRJNA365681	Grassland	39.7392	-123.631
SAMN06264885	PRJNA365682	Grassland	39.7392	-123.631
SAMN06264948	PRJNA365686	Grassland	39.7392	-123.631
SAMN06266456	PRJNA365702	Grassland	39.7392	-123.631
SAMN06266453	PRJNA365691	Grassland	39.7392	-123.631
SAMN06266453	PRJNA365691	Grassland	39.7392	-123.631
SAMN06264635	PRJNA365703	Grassland	39.7392	-123.631
SAMN06266457	PRJNA365707	Grassland	39.7392	-123.631
SAMN06264882	PRJNA365708	Grassland	39.7392	-123.631
SAMN06264632	PRJNA365710	Grassland	39.7392	-123.631
SAMN06266458	PRJNA365712	Grassland	39.7392	-123.631
SAMN06266424	PRJNA365713	Grassland	39.7392	-123.631
SAMN06264630	PRJNA365716	Grassland	39.7392	-123.631
SAMN06266484	PRJNA365714	Grassland	39.7392	-123.631
SAMN06264631	PRJNA365715	Grassland	39.7392	-123.631
SAMN06266459	PRJNA365717	Grassland	39.7392	-123.631
SAMN06266486	PRJNA365719	Grassland	39.7392	-123.631
SAMN06266485	PRJNA365718	Grassland	39.7392	-123.631
SAMN06266460	PRJNA365720	Grassland	39.7392	-123.631
SAMN06266487	PRJNA365722	Grassland	39.7392	-123.631
SAMN06264385	PRJNA365721	Grassland	39.7392	-123.631
SAMN06264881	PRJNA365723	Grassland	39.7392	-123.631
SAMN06266461	PRJNA365724	Grassland	39.7392	-123.631
SAMN06266489	PRJNA365725	Grassland	39.7392	-123.631
SAMN06266490	PRJNA365726	Grassland	39.7392	-123.631
SAMN06264947	PRJNA365727	Grassland	39.7392	-123.631
SAMN06264383	PRJNA365884	Grassland	39.7392	-123.631
SAMN06264384	PRJNA365728	Grassland	39.7392	-123.631
SAMN06264866	PRJNA365886	Grassland	39.7392	-123.631
SAMN06264613	PRJNA365647	Tundra	68.6137	-149.314
SAMN06267413	PRJNA367093	Tundra	68.6137	-149.314
SAMN06267415	PRJNA367095	Tundra	68.6137	-149.314
SAMN06267604	PRJNA367043	Agricultural Land	45.54	-73.72
SAMN06264513	PRJNA365473	Wetland	39.7291	-123.642
SAMN06266222	PRJNA365472	Wetland	39.7291	-123.642
SAMN06266261	PRJNA365336	Wetland	37.4971	-122.133
SAMN06266276	PRJNA365352	Wetland	37.4962	-122.133
SAMN06264478	PRJNA365353	Wetland	37.4965	-122.133
SAMN06266228	PRJNA365337	Wetland	37.4958	-122.133
SAMN06344123	PRJNA375517	Forest	9.1086	-79.8436
SAMN06344124	PRJNA375518	Forest	9.1086	-79.8436
SAMN06344122	PRJNA375516	Forest	9.1086	-79.8436
SAMN06344125	PRJNA375519	Forest	9.1086	-79.8436
SAMN06858794	PRJNA385547	Agricultural Land	46.7447	131.697
SAMN06858842	PRJNA385547	Agricultural Land	31.9375	120.056
SAMN06858849	PRJNA385547	Agricultural Land	30.9178	119.51
SAMN06858852	PRJNA385547	Agricultural Land	23.1295	102.741
SAMN06858862	PRJNA385547	Agricultural Land	23.2119	102.383
SAMN06858865	PRJNA385547	Agricultural Land	23.0522	101.035
SAMN06858872	PRJNA385547	Agricultural Land	24.4704	101.246
SAMN06858796	PRJNA385547	Agricultural Land	48.0444	133.466
SAMN06858809	PRJNA385547	Agricultural Land	45.2814	131.166
SAMN06858810	PRJNA385547	Agricultural Land	30.9047	114.117
SAMN06858815	PRJNA385547	Agricultural Land	30.38	113.284
SAMN06858821	PRJNA385547	Agricultural Land	28.7958	112.343
SAMN06858825	PRJNA385547	Agricultural Land	29.95	113.823
SAMN06858832	PRJNA385547	Agricultural Land	30.7069	121.247
SAMN06858835	PRJNA385547	Agricultural Land	30.6328	120.235
SAMN06343827	PRJNA375299	Shrubland	40.7999	-76.3402
SAMN06343828	PRJNA375300	Artificial Surfaces	40.7999	-76.3402
SAMN06343830	PRJNA375302	Shrubland	40.7999	-76.3402
SAMN06343829	PRJNA375301	Shrubland	40.7999	-76.3402
SAMN06343831	PRJNA375303	Shrubland	40.7999	-76.3402
SAMN06343832	PRJNA375304	Shrubland	40.7999	-76.3402
SAMN06343833	PRJNA375305	Shrubland	40.7999	-76.3402
SAMN06343834	PRJNA375306	Shrubland	40.7999	-76.3402
SAMN06343835	PRJNA375307	Shrubland	40.7999	-76.3402
SAMN06343836	PRJNA375308	Shrubland	40.7999	-76.3402
SAMN06343862	PRJNA375334	Shrubland	40.7999	-76.3402
SAMN06343837	PRJNA375309	Shrubland	40.7999	-76.3402
SAMN06343962	PRJNA375660	Agricultural Land	35.8443	-83.9607
SAMN06343960	PRJNA375658	Agricultural Land	35.8443	-83.9607
SAMN04589357	PRJNA316914	Grassland	30.5	91.05
SAMN07184292	PRJNA388750	Agricultural Land	36.52	115.01
SAMN07184291	PRJNA388750	Agricultural Land	36.52	115.01
SAMN07184283	PRJNA388750	Agricultural Land	36.52	115.01
SAMN07184286	PRJNA388750	Agricultural Land	36.52	115.01
SAMN07184288	PRJNA388750	Agricultural Land	36.52	115.01
SAMN07184287	PRJNA388750	Agricultural Land	36.52	115.01
SAMN07184289	PRJNA388750	Agricultural Land	36.52	115.01
SAMN07184284	PRJNA388750	Agricultural Land	36.52	115.01
SAMN07184290	PRJNA388750	Agricultural Land	36.52	115.01
SAMN07184281	PRJNA388750	Agricultural Land	36.52	115.01
SAMN07184282	PRJNA388750	Agricultural Land	36.52	115.01
SAMN07184277	PRJNA388750	Agricultural Land	36.52	115.01
SAMN07184278	PRJNA388750	Agricultural Land	36.52	115.01
SAMN07184293	PRJNA388750	Agricultural Land	36.52	115.01
SAMN06343930	PRJNA375628	Tundra	71.299	-156.61
SAMN06343931	PRJNA375629	Tundra	71.299	-156.61
SAMN06343931	PRJNA375629	Tundra	71.299	-156.61
[truncated: 3,598 more rows]
